# Supplementary material for: Transcriptome Analysis of Different Tissues Reveals Key Genes Associated With Galanthamine Biosynthesis in Lycoris longituba
Source: Front Plant Sci. 2020 Sep 16;11:519752. doi: 10.3389/fpls.2020.519752 (PMC7525064; doi:10.3389/fpls.2020.519752)
Supplement: Supplementary file 6 [file Table_6.xlsx]

## Sheet: Sheet1
Unigene ID	Root-1	Root-2	Root-3	Leaf-1	Leaf-2	Leaf-3	Bulb-1	Bulb-2	Bulb-3	NR
c145476_g2	22442.1	22549.4	22052.3	4334.34	4210.5	4254.33	4793.93	4604.13	4858.39	gi|16304008|gb|AAL16908.1|AF420017_1 metallothionein-like protein type 2 [Narcissus pseudonarcissus]
c126042_g1	12116.4	12096.4	11804.6	24.89	14.89	2.76	136.19	124.96	121.19	gi|1028976562|ref|XP_016731714.1| PREDICTED: probable aquaporin TIP-type [Gossypium hirsutum] gi|728830040|gb|KHG09483.1| putative aquaporin TIP-type [Gossypium arboreum]
c144089_g3	10059.5	10524.5	10747.5	1582.48	1622.57	1601.61	10437.4	9660.83	9718.88	gi|928541144|gb|ALF00131.1| heat shock protein 70 [Chimonanthus praecox]
c136511_g1	9948.11	7943.21	8140.8	273.85	278.87	272.26	244.85	248.53	260.21	gi|474144566|gb|EMS56715.1| putative aquaporin PIP2-2 [Triticum urartu]
c143801_g2	8579.6	8424.44	8574.24	4.66	4.38	3.77	55.17	53.51	53.1	gi|357136874|ref|XP_003570028.1| PREDICTED: probable aquaporin TIP2-1 [Brachypodium distachyon] gi|944065025|gb|KQK00616.1| hypothetical protein BRADI_3g50690 [Brachypodium distachyon]
c129975_g4	7010.61	7089.27	6937.56	5845.92	5921.29	4748.55	5147.92	5159.25	4971.47	gi|319996466|dbj|BAJ61942.1| ubiquitin [Nymphaea hybrid cultivar]
c128742_g1	5930.05	5256.61	5306.25	306.49	323.26	329.39	1719.77	1821.71	1836.46	-
c150414_g1	5109.92	5192.35	5264.6	287.49	268.71	265.65	415.13	405.31	421.99	gi|767766669|gb|AJT55763.1| aquaporin plasma intrinsic protein 2 [Allium sativum]
c150465_g1	4444.78	4647.2	2109.19	1030.5	869.06	879.19	2081.44	1979.6	1803.89	gi|947068961|gb|KRH17852.1| hypothetical protein GLYMA_13G021700, partial [Glycine max]
c134458_g8	4083.87	4722.87	4749.39	289.49	212.39	219.3	1465.3	1255.15	1271.04	-
c140447_g4	3982.41	2476.26	2559.86	109.78	53.02	53.83	67.26	74.17	69.89	gi|695022916|ref|XP_009398603.1| PREDICTED: probable aquaporin PIP2-2 [Musa acuminata subsp. malaccensis]
c141016_g2	3769.11	3893.41	3846.56	3458.09	3398.76	3419.3	3449.1	3405.27	3198.62	gi|743808973|ref|XP_011018400.1| PREDICTED: acyl-CoA-binding protein-like [Populus euphratica]
c139971_g2	3751.63	3789.9	3755.09	943.17	961.06	926.24	1951.93	1984.22	2025.67	gi|703103969|ref|XP_010097872.1| Ubiquitin-conjugating enzyme E2 10 [Morus notabilis] gi|587883552|gb|EXB72469.1| Ubiquitin-conjugating enzyme E2 10 [Morus notabilis]
c143971_g2	3593.54	3540.78	3671.64	25.15	26.67	25.07	2.3	2	2.2	gi|743827673|ref|XP_010933649.1| PREDICTED: probable aquaporin TIP2-1 [Elaeis guineensis]
c145090_g1	3392.86	2956.64	3094.23	423.16	432.35	438.09	2053.24	1758	1765.47	gi|672162785|ref|XP_008801219.1| PREDICTED: probable aquaporin TIP1-1 [Phoenix dactylifera]
c143900_g4	3230.09	3080.91	3125.35	1369.99	1439.66	1297.37	2078.48	2554.49	2462.66	gi|297736783|emb|CBI25984.3| unnamed protein product [Vitis vinifera]
c147583_g1	3192.12	3006.95	3094.78	943.72	924.43	926.87	1074.09	1017.64	990.86	gi|694997269|ref|XP_009398521.1| PREDICTED: catalase isozyme A [Musa acuminata subsp. malaccensis]
c123571_g1	2875.22	2635.9	2656.21	50.73	52.15	49.23	259.87	227.78	238.86	-
c148136_g1	2745.88	2299.3	2281.06	2492.51	2175.62	2140.51	7274.78	6111.07	6157.22	gi|66391052|dbj|BAD98797.1| lectin [Lycoris radiata]
c138876_g4	2632.48	2737.5	2736.98	685.2	770.17	597.54	3562.34	3734.58	3496.46	gi|672189293|ref|XP_008813803.1| PREDICTED: probable BOI-related E3 ubiquitin-protein ligase 2 [Phoenix dactylifera]
c138086_g1	2509.19	2591.15	2582.1	1609.44	1480.9	1466.4	2140.51	2044.14	2079.93	gi|502121920|ref|XP_004497490.1| PREDICTED: polyubiquitin-like [Cicer arietinum]
c147966_g1	2394.6	2360.01	2338.05	755.08	717.13	712.28	1375.39	1233.9	1227.7	gi|743887118|ref|XP_010910310.1| PREDICTED: YTH domain-containing family protein 2-like [Elaeis guineensis]
c144339_g1	2261.42	1980.12	2025.42	375.23	364.25	351.7	1332.42	1283.47	1251.3	gi|743812308|ref|XP_010929385.1| PREDICTED: eukaryotic initiation factor 4A-15 [Elaeis guineensis]
c145203_g1	2259.26	2347.79	2365.96	2361.26	2215.19	2434.11	5639.65	5499.69	5394.68	gi|445068900|gb|AGE15419.1| S-adenosyl-L-methionine synthetase [Hosta ventricosa]
c149580_g1	2249.56	2069.36	2074.13	18.02	20.06	16.28	18.08	16.71	13.41	gi|68299599|dbj|BAE02729.1| PIP aquaporin [Hordeum vulgare]
c143801_g1	2189.75	1975.61	2066.94	0.73	0.62	0.42	24.23	20.13	20.29	gi|1549339|gb|AAB08471.1| aquaporin homologue [Allium cepa]
c135557_g2	2116.81	1938.06	1997.24	679.9	520.19	498.6	1778.9	1590.93	1589.87	gi|1035909420|gb|OAY39015.1| hypothetical protein MANES_10G060800 [Manihot esculenta]
c142612_g2	2057.8	1338.77	1266.62	1091.59	997.94	893.43	971.04	917.2	920.05	gi|674857252|emb|CDY70361.1| BnaAnng33460D, partial [Brassica napus]
c131830_g5	2053.97	1969.33	2019.97	165.72	156.72	164.66	1391.92	1467.94	1405.92	gi|593800199|ref|XP_007163137.1| hypothetical protein PHAVU_001G209600g [Phaseolus vulgaris] gi|561036601|gb|ESW35131.1| hypothetical protein PHAVU_001G209600g [Phaseolus vulgaris]
c146756_g3	1971.14	1792.97	1748.56	431.47	463.63	442.33	1290.02	1120.22	1204.35	gi|357163676|ref|XP_003579810.1| PREDICTED: dehydrin COR410-like [Brachypodium distachyon] gi|944047117|gb|KQJ82758.1| hypothetical protein BRADI_5g10860 [Brachypodium distachyon]
c149474_g1	1932.4	1938.48	2003.43	422.06	401.87	398.19	1589.23	1361.68	1389.56	-
c146673_g2	1896.11	1659.26	1708.96	152.01	121.31	123.91	1605.65	1507.8	1518.57	gi|720087077|ref|XP_010244041.1| PREDICTED: alcohol dehydrogenase 1 [Nelumbo nucifera]
c146799_g1	1877.32	1533.7	1541.02	1297.63	1250.05	1307.86	409.66	388.4	396.11	gi|743777510|ref|XP_010919190.1| PREDICTED: glutathione S-transferase U17-like isoform X2 [Elaeis guineensis]
c148317_g2	1877.15	1619.19	1612.54	1738.72	1528.35	1534.36	7439.71	6024.45	6341.31	gi|6723478|emb|CAB66336.1| alpha-tubulin [Betula pendula] gi|734592636|gb|AJA29683.1| tubulin alpha chain [Betula luminifera]
c147897_g1	1850.4	1882.75	1934.61	43.4	47.76	47.61	524.23	583.97	598.25	gi|743779408|ref|XP_010920170.1| PREDICTED: trans-resveratrol di-O-methyltransferase-like [Elaeis guineensis]
c131892_g1	1826.97	1980.49	2008.61	3.68	2.57	2.93	11.88	12.01	13.2	gi|672141465|ref|XP_008794561.1| PREDICTED: probable glutathione S-transferase [Phoenix dactylifera]
c144205_g1	1826.01	1658.49	1639.85	2337.7	2268.17	2256.84	5775.43	5670.48	5574.33	gi|118482623|gb|ABK93231.1| unknown [Populus trichocarpa]
c135664_g1	1807.88	1869.73	1913.25	6.49	3.34	4.95	4.86	1.84	6.82	-
c149184_g1	1801.5	1876.36	1878.72	143.17	159.44	160.6	1304.43	1294.34	1290.82	gi|1002649811|gb|AMN16535.1| sucrose synthase [Ornithogalum longebracteatum]
c140444_g1	1772.67	1916.31	1916.58	1860.75	1864.65	1934.73	8773.89	8442.58	8407.04	gi|403329432|gb|AFR42026.1| alpha-tubulin, partial [Populus trichocarpa]
c137852_g1	1765.01	1492.11	1511.82	138.06	146.21	144.32	136.67	141.37	136.57	gi|42565393|gb|AAS20971.1| pathogenesis-related protein [Hyacinthus orientalis]
c150759_g4	1737.11	1732.11	1678.68	81.07	73.07	68.99	260.93	246.53	253.93	-
c143500_g3	1694.54	1653.08	1697.87	380.51	425.4	399.75	852.62	808.39	819.15	gi|937914879|dbj|BAS89798.1| Os04g0486600, partial [Oryza sativa Japonica Group]
c149237_g3	1687.77	1723.69	1780.46	397.32	385	377.59	979.08	979.39	999.63	gi|672135237|ref|XP_008791285.1| PREDICTED: enolase isoform X2 [Phoenix dactylifera]
c148065_g1	1677.48	501.1	527.48	144.32	156.94	152.32	505.97	470.97	473.1	gi|672184363|ref|XP_008812489.1| PREDICTED: DEAD-box ATP-dependent RNA helicase 7-like [Phoenix dactylifera]
c145204_g7	1677.21	1967.45	2055.33	534.46	755.62	756.63	1499.92	1635.07	1583.44	gi|645233137|ref|XP_008223198.1| PREDICTED: translationally-controlled tumor protein homolog [Prunus mume]
c138787_g1	1649.92	1506.84	1504.03	178.45	204.26	206.87	760.3	710.73	744.23	-
c120281_g1	1639.07	1657.59	1696.12	360.06	431.74	440.79	1441.55	1478.58	1454.09	gi|84873907|gb|ABC67965.1| heat shock protein XF20-1, partial [Triticum aestivum]
c144193_g3	1620.64	1516.96	1587.51	526.11	493.53	504.06	1257.29	1246.23	1287.49	gi|568815612|ref|NP_001275611.1| eukaryotic translation initiation factor 1A-like [Solanum tuberosum] gi|81076307|gb|ABB55392.1| putative translation initiation factor eIF-1A-like [Solanum tuberosum]
c138624_g4	1592.72	1781	1796.55	672.03	867.94	881.99	1785.43	1934.9	1944.43	gi|399525596|gb|AFP44110.1| elongation factor 1-alpha [Lycoris longituba]
c145344_g1	1583.53	1522.87	1557.03	136.1	129.1	127.96	138.26	138.06	148.95	-
c137628_g1	1552.45	1514.71	1526.53	8.97	8.27	9.54	16.32	15.38	16.2	gi|1033211140|gb|ANH58208.1| glutathione S-transferase [Dracaena cambodiana]
c146756_g2	1539.55	1797.79	1803.82	215.29	187.22	182.64	850.98	827.27	851.98	-
c135138_g1	1506.09	1451.1	1470.65	1305.93	1339.72	1328.5	1529.34	1463.99	1510.96	gi|672116539|ref|XP_008781436.1| PREDICTED: abscisic stress-ripening protein 1-like [Phoenix dactylifera]
c128549_g1	1494.64	1474.64	1519.39	50.05	40.05	31.42	762.9	723.59	747.9	gi|1021026002|gb|KZM83789.1| hypothetical protein DCAR_028789 [Daucus carota subsp. sativus]
c128597_g2	1484.05	1202.38	1314.46	790.22	756.83	708.01	3528.5	3868.63	3896	gi|568215689|ref|NP_001275472.1| alpha-tubulin-like protein [Solanum tuberosum] gi|76573359|gb|ABA46784.1| alpha-tubulin-like protein [Solanum tuberosum]
c138955_g2	1481.71	1310.86	1344.63	683.23	694.02	676.46	1332.63	1277.36	1283.03	gi|374256075|gb|AEZ00899.1| putative 24 kDa seed maturation protein [Elaeis guineensis]
c130512_g1	1472.95	1569.02	1552.55	2.84	2.56	2.7	2742.87	2754.14	2765.92	gi|33439735|gb|AAQ18904.1| mannose-binding lectin [Amaryllis minuta]
c150418_g5	1468.77	1447.15	1452.78	29.08	26.25	28.75	65.19	66.83	59.86	gi|743758774|ref|XP_010928688.1| PREDICTED: probable NAD(P)H dehydrogenase (quinone) FQR1-like 1 [Elaeis guineensis]
c137356_g1	1465.76	1428.76	1447.76	1010.94	1005.94	858.89	1955.16	1972.37	1937.16	gi|596287846|ref|XP_007225841.1| hypothetical protein PRUPE_ppa011659mg [Prunus persica] gi|462422777|gb|EMJ27040.1| hypothetical protein PRUPE_ppa011659mg [Prunus persica]
c146338_g4	1448.89	1757.98	1834.84	381.23	325.4	320.94	1029.43	1068.65	1084.91	gi|695012719|ref|XP_009393126.1| PREDICTED: cathepsin B-like [Musa acuminata subsp. malaccensis]
c135868_g2	1446.62	1580.36	1711.86	1043.18	940.16	1016.71	2005.48	2159.45	2217.86	gi|694397995|ref|XP_009374202.1| PREDICTED: glycine-rich RNA-binding protein 7-like [Pyrus x bretschneideri]
c144938_g1	1418.59	1416.31	1479.51	3561.06	3690.02	3699.24	4791.83	4633.46	4392.92	-
c148186_g1	1407.49	1360.79	1371.02	886.67	729.03	890.26	4302.63	4060.58	4037.13	gi|672110370|ref|XP_008794946.1| PREDICTED: histone H2B.11-like [Phoenix dactylifera]
c137107_g1	1375.59	1217.8	1218.2	449.32	442.15	441.53	1020.36	1029.91	977.18	gi|641846268|gb|KDO65152.1| hypothetical protein CISIN_1g015129mg [Citrus sinensis] gi|641846269|gb|KDO65153.1| hypothetical protein CISIN_1g015129mg [Citrus sinensis] gi|641846270|gb|KDO65154.1| hypothetical protein CISIN_1g015129mg [Citrus sinensis]
c145452_g2	1332.3	1250.75	1298.3	121.74	112.74	114.86	463.24	490.91	477.24	gi|743858458|ref|XP_010942358.1| PREDICTED: uncharacterized protein LOC105060382 [Elaeis guineensis]
c143791_g4	1329.18	1100.55	1129.92	246.41	275.08	266.97	1059.9	1007.09	1039.32	gi|743822486|ref|XP_010932289.1| PREDICTED: fructose-bisphosphate aldolase cytoplasmic isozyme-like [Elaeis guineensis]
c130499_g6	1310.74	1059.43	1101.36	65.32	59.25	61.62	67.96	63.92	69.38	-
c150160_g2	1279.6	919.5	982.36	327.18	209.14	209.1	64.1	59.74	57.14	gi|386688290|gb|AFJ21575.1| vacuolar invertase [Agave tequilana] gi|386688302|gb|AFJ21581.1| putative vacuolar invertase [Agave tequilana]
c149842_g1	1241.99	1241.39	1230.25	1868.79	1817.87	1850.78	1561.44	1544.06	1647.6	gi|672109729|ref|XP_008791709.1| PREDICTED: mannan endo-1,4-beta-mannosidase 2 [Phoenix dactylifera]
c141083_g1	1237.21	1473.44	1475.83	160.11	119.16	124.57	1303.08	1302.35	1390.07	gi|743856020|ref|XP_010941733.1| PREDICTED: phosphoglycerate mutase-like protein AT74 isoform X2 [Elaeis guineensis]
c149301_g1	1224.36	1204.36	1219.73	365.24	355.24	343.43	802.52	825.42	787.52	gi|672128488|ref|XP_008787734.1| PREDICTED: basic leucine zipper and W2 domain-containing protein 2-like [Phoenix dactylifera]
c123753_g1	1153.14	1113.32	1119.14	39.35	30.35	24.97	105.97	126.32	119.97	-
c138624_g6	1137.68	1269.92	1421.11	790.59	736.28	712.75	1323.66	1391.24	1315.53	gi|148807175|gb|ABR13297.1| putative elongation factor 1-alpha [Prunus dulcis]
c144071_g2	1106.92	1203.12	1203.68	511.88	622.38	602.02	1266.45	1067.49	1136.83	gi|743754811|ref|XP_010918870.1| PREDICTED: GTP-binding nuclear protein Ran-A1-like [Elaeis guineensis]
c149519_g1	1102.8	1002.49	1010.48	873.87	797.72	784.4	769.72	753.25	743.08	gi|743756147|ref|XP_010915357.1| PREDICTED: NADP-dependent malic enzyme isoform X1 [Elaeis guineensis]
c110777_g1	1099.73	912.54	889.61	636.7	671.15	584.17	1204.59	1059.15	1077.24	gi|328835774|dbj|BAK19068.1| ubiquitin [Ipomoea nil]
c123667_g1	1092.86	1044.08	1038.99	301.63	344.34	329.15	57.5	65.96	55.1	gi|386688290|gb|AFJ21575.1| vacuolar invertase [Agave tequilana] gi|386688302|gb|AFJ21581.1| putative vacuolar invertase [Agave tequilana]
c143062_g3	1071.53	865.86	916.94	416.22	377.71	370.53	858.26	727.41	729.24	gi|743785490|ref|XP_010921920.1| PREDICTED: protein EARLY RESPONSIVE TO DEHYDRATION 15 [Elaeis guineensis] gi|743785494|ref|XP_010921921.1| PREDICTED: protein EARLY RESPONSIVE TO DEHYDRATION 15 [Elaeis guineensis]
c132333_g2	1058.53	808.98	832.86	595.52	597.9	647.78	2277.32	2378.57	2405.88	gi|924648796|gb|ALC74038.1| alpha tubulin 1, partial [Larix gmelinii var. olgensis]
c146094_g2	1053.77	1033.77	1097.61	499.29	489.29	484.96	1003.01	1007.95	988.01	gi|1035949009|gb|OAY72631.1| GTP-binding nuclear protein Ran-3 [Ananas comosus]
c145955_g1	1045.52	1004.2	1011.52	30.63	21.63	23.61	8.65	9.91	9.81	gi|743754952|ref|XP_010926277.1| PREDICTED: aldehyde dehydrogenase family 2 member C4-like [Elaeis guineensis]
c147118_g1	1014.88	930.39	1010.89	622.22	615.54	590.26	657.46	584.84	610.56	gi|674251536|gb|KFK44301.1| hypothetical protein AALP_AA1G240100 [Arabis alpina]
c133252_g2	1010	1032.69	1043.62	0.69	0.81	0.47	4.75	5.27	6.85	gi|695049652|ref|XP_009412768.1| PREDICTED: bidirectional sugar transporter SWEET14-like [Musa acuminata subsp. malaccensis]
c139752_g1	1005.74	1051.74	1091.76	271.22	336.33	326.32	716.3	842.35	839.91	gi|1035941244|gb|OAY67398.1| ABC transporter F family member 1 [Ananas comosus]
c139686_g1	993	962.97	995.7	48.14	44.03	41.55	152.2	130.74	137.81	gi|695048782|ref|XP_009412306.1| PREDICTED: allene oxide synthase 2-like [Musa acuminata subsp. malaccensis]
c148820_g5	990.61	894.77	924.54	501.24	544.64	571.72	955.49	843.77	837.61	gi|743771755|ref|XP_010916166.1| PREDICTED: 14-3-3-like protein [Elaeis guineensis]
c135559_g1	982.05	959.89	964.12	106.4	85.79	74.12	450.79	374.17	409.99	gi|327241218|gb|AEA40453.1| aquaporin PIP1 [Hedychium coronarium]
c147667_g2	960.08	756.95	776.08	369.73	332.32	316.18	392.25	310.62	304.74	gi|1035963867|gb|OAY84317.1| Cysteine proteinase 1 [Ananas comosus]
c149044_g1	954.14	924.1	929.14	69.67	33.67	34.67	44.12	19.12	16.69	gi|672133745|ref|XP_008790506.1| PREDICTED: CBL-interacting protein kinase 1-like [Phoenix dactylifera]
c149027_g1	947.85	890.39	978.98	432.53	395.47	407.71	2007.58	1869.04	1921.73	gi|47026912|gb|AAT08677.1| histone H2A [Hyacinthus orientalis]
c148715_g2	945.58	925.58	977.29	603.65	593.65	564.11	1138.41	1126.47	1123.41	gi|820831949|gb|AKG93801.1| actin, partial [Avena sativa]
c143581_g1	942.1	971.96	991.89	1436.81	1121.04	1136.94	1386.79	1017.12	1050.33	gi|47027098|gb|AAT08762.1| HMG transcription factor [Hyacinthus orientalis]
c148780_g2	938.58	691.07	690.35	114.89	96.73	93.03	119.28	78.53	78.35	gi|1352461|sp|P49249.1|IN22_MAIZE RecName: Full=IN2-2 protein gi|724429862|emb|CAA41448.1| In2-2 [Zea mays]
c135816_g6	932.79	726.94	733.13	297.2	264.58	261.02	671.35	565.85	566.6	gi|695062744|ref|XP_009419853.1| PREDICTED: BI1-like protein [Musa acuminata subsp. malaccensis]
c136111_g1	927.46	883.36	909.46	266.67	261.67	243.54	776.54	752.63	758.54	gi|743838397|ref|XP_010936690.1| PREDICTED: uncharacterized protein LOC105056252 [Elaeis guineensis]
c150005_g1	911.81	903.81	879.92	169.63	154.63	159.22	113.95	125.95	106.21	gi|695001526|ref|XP_009416677.1| PREDICTED: uncharacterized protein C24B11.05-like isoform X2 [Musa acuminata subsp. malaccensis]
c135081_g1	889.82	874.49	907.7	267.91	296.56	317.75	591.93	589.44	596.43	gi|1012364185|gb|KYP75368.1| SKP1-like protein 1A [Cajanus cajan]
c134159_g3	889.72	817.12	883	227.85	209.39	244.5	1500.63	1929.6	1873.04	gi|1012354892|gb|KYP66079.1| Glycine-rich RNA-binding protein GRP2A [Cajanus cajan]
c136448_g3	871.06	528.21	544.47	268.08	233.77	246.91	1194.28	819.4	816.91	gi|47027014|gb|AAT08722.1| cold-induced protein [Hyacinthus orientalis]
c136339_g1	866.66	895.71	906.71	398.38	254.13	261.47	51.89	55.39	48.92	-
c135630_g1	856.29	771.46	759.86	245.21	384.08	392.5	412.12	551.48	536.21	gi|1009161358|ref|XP_015898853.1| PREDICTED: ubiquitin-conjugating enzyme E2 variant 1D [Ziziphus jujuba]
c134487_g3	852.96	755.19	807.11	133.15	101.16	106.73	254.36	212.19	207.73	gi|672136530|ref|XP_008791967.1| PREDICTED: protein GDAP2 homolog [Phoenix dactylifera]
c147286_g1	852.85	773.78	793.66	54.73	47.1	49.56	475.44	501.81	503.16	gi|1002649813|gb|AMN16536.1| sucrose synthase [Ornithogalum longebracteatum]
c133395_g2	850.24	978.34	990.47	200.02	290.69	292.96	845.18	1022.11	1047.18	gi|695039636|ref|XP_009407362.1| PREDICTED: 40S ribosomal protein S11 [Musa acuminata subsp. malaccensis]
c143831_g2	841.83	870.76	851.56	121.8	116.69	128.09	396.97	351.56	379.13	gi|695066255|ref|XP_009380012.1| PREDICTED: uncharacterized protein LOC103968493 [Musa acuminata subsp. malaccensis]
c146100_g7	832.05	163.52	165.96	103.24	170.1	111.24	487.16	452.16	479.06	gi|474429728|gb|EMS67926.1| Histone H4 [Triticum urartu]
c127110_g1	830.92	748.5	750.1	12.06	12.17	12.37	214.85	188.16	185.02	gi|672170656|ref|XP_008805390.1| PREDICTED: LOW QUALITY PROTEIN: ervatamin-B-like [Phoenix dactylifera]
c79786_g1	823.65	818.11	818.43	154.83	115.79	147.42	312.31	343.73	308.17	gi|15010552|gb|AAK74073.1| eukaryotic translation initiation factor 4A-1 [Elaeis oleifera]
c136483_g4	800.02	613.19	626.02	343.64	401.38	351.64	335.67	300.67	284.38	gi|695012283|ref|XP_009392894.1| PREDICTED: CBS domain-containing protein CBSX3, mitochondrial-like [Musa acuminata subsp. malaccensis]
c135559_g3	798.61	636.08	620.47	437.89	353.13	348.12	498.07	379.64	410.81	gi|694383809|ref|XP_009367837.1| PREDICTED: probable aquaporin PIP1-2 [Pyrus x bretschneideri]
c140874_g3	782.6	746.41	777.38	180.87	177.15	173.46	220.66	240.74	216.52	gi|695027577|ref|XP_009401137.1| PREDICTED: 2-alkenal reductase (NADP(+)-dependent)-like [Musa acuminata subsp. malaccensis]
c141358_g2	775.44	582.03	602.86	447.01	364.4	389.54	1011.46	865.95	925.44	gi|1012100472|ref|XP_015957225.1| PREDICTED: 40S ribosomal protein S15-4-like [Arachis duranensis] gi|1021495673|ref|XP_016190856.1| PREDICTED: 40S ribosomal protein S15-4-like [Arachis ipaensis]
c149644_g1	772.59	726.85	792.27	254.86	263.89	252.21	177.4	156.21	159.09	-
c135853_g3	735.15	727.15	751.99	344.77	329.77	319.21	438.86	450.86	455.61	gi|743841990|ref|XP_010937681.1| PREDICTED: actin-depolymerizing factor 7-like [Elaeis guineensis]
c136785_g3	733.26	734.52	725.64	312.29	293.5	297.6	630.47	557.15	563.61	gi|1035957486|gb|OAY78893.1| DNA-directed RNA polymerases II, IV and V subunit 6A [Ananas comosus]
c146313_g1	730.99	638.86	630.11	345.45	348.16	356.42	541.05	481.53	479.98	gi|224139844|ref|XP_002323304.1| hypothetical protein POPTR_0016s05220g [Populus trichocarpa] gi|566208806|ref|XP_006373771.1| hypothetical protein POPTR_0016s05220g [Populus trichocarpa] gi|743869481|ref|XP_011033292.1| PREDICTED: zinc finger A20 and AN1 domain-containing stress-associated protein 8-like [Populus euphratica] gi|743869483|ref|XP_011033293.1| PREDICTED: zinc finger A20 and AN1 dom…
c140263_g4	729.56	654.37	695.56	420.72	411.72	393.12	560.93	607.06	574.93	gi|399525608|gb|AFP44116.1| eukaryotic translation initiation factor [Lycoris longituba]
c149163_g1	727.14	715.14	730.73	465.53	475.9	457.53	845.7	836.7	810.69	gi|672153449|ref|XP_008797576.1| PREDICTED: WD repeat and HMG-box DNA-binding protein 1 [Phoenix dactylifera]
c148582_g1	726.05	754.18	760.19	672.7	508.06	510.26	524.03	423.88	438.81	gi|148927382|gb|ABR19827.1| cysteine proteinase [Elaeis guineensis]
c146553_g2	723.78	537.89	641.91	521.19	345.01	342.4	951.44	889.2	886.01	gi|672194727|ref|XP_008776367.1| PREDICTED: 40S ribosomal protein S3-3 [Phoenix dactylifera]
c126994_g1	723.56	739.69	731.73	554.01	549.19	563.57	387.13	396.58	424.31	gi|399525614|gb|AFP44118.1| cyclophilin [Lycoris longituba]
c128597_g1	722.91	704.11	744.96	1233.79	1107.14	1076.79	5714.32	4826.87	5015.58	gi|1009183045|ref|XP_015873042.1| PREDICTED: tubulin alpha chain-like, partial [Ziziphus jujuba]
c147219_g2	716.01	782.5	766.13	1003.43	864.11	926.4	1026.78	938.94	985.52	gi|971460056|emb|CUT18430.1| H1.5, partial [Lilium davidii var. unicolor]
c129258_g1	715.29	799.12	795.86	167.72	178.99	178.96	849.34	815.86	815.19	gi|25992539|gb|AAN77149.1| fiber protein Fb9 [Gossypium barbadense]
c135309_g1	714.47	551.01	565.96	18	15.32	16.47	5.54	5.39	5.84	gi|743843489|ref|XP_010938083.1| PREDICTED: protein LURP-one-related 8-like [Elaeis guineensis]
c146471_g7	713.64	660.28	695.64	130.13	125.13	123.88	276.73	270.3	258.73	gi|672142820|ref|XP_008795274.1| PREDICTED: cleft lip and palate transmembrane protein 1 homolog [Phoenix dactylifera] gi|672142822|ref|XP_008795275.1| PREDICTED: cleft lip and palate transmembrane protein 1 homolog [Phoenix dactylifera]
c142824_g3	713.39	548.32	565.82	269.55	238.77	233.61	784.75	717.09	704.98	gi|1035952869|gb|OAY75244.1| GTP-binding protein SAR1A, partial [Ananas comosus]
c144420_g2	700.72	723.41	785.64	1057.92	994.89	880.97	467.26	419.32	414.44	gi|567864052|ref|XP_006424675.1| hypothetical protein CICLE_v10030198mg, partial [Citrus clementina] gi|557526609|gb|ESR37915.1| hypothetical protein CICLE_v10030198mg, partial [Citrus clementina]
c139711_g1	696.18	558.46	559.66	338.48	285.18	289.77	427.05	313.57	320.66	gi|743795913|ref|XP_010924599.1| PREDICTED: tubby-like F-box protein 1 [Elaeis guineensis]
c148285_g2	691.59	549.24	539.98	109.67	112.62	90.95	669.12	441.7	419.76	gi|371781477|emb|CCA95097.1| putative heat shock protein 90, partial [Liriodendron tulipifera]
c145347_g3	689.22	671.77	684.06	0.52	1.24	0.21	13.01	9.05	6.75	gi|743788074|ref|XP_010922574.1| PREDICTED: asparagine synthetase [glutamine-hydrolyzing] [Elaeis guineensis]
c136835_g1	687.99	639.28	675.13	635.9	671.93	678.48	531.4	530.97	537.7	gi|1035951630|gb|OAY74293.1| L-ascorbate peroxidase, cytosolic [Ananas comosus]
c148626_g1	685.09	635.16	656.34	2919.83	2866	3014.83	8200.59	8032.17	8417.63	-
c142432_g1	683.85	442.98	447.59	333.16	202.65	200.47	422.95	395.19	408.27	gi|743786983|ref|XP_010922309.1| PREDICTED: uncharacterized protein LOC105045653 [Elaeis guineensis] gi|743786989|ref|XP_010922310.1| PREDICTED: uncharacterized protein LOC105045653 [Elaeis guineensis] gi|743786993|ref|XP_010922311.1| PREDICTED: uncharacterized protein LOC105045653 [Elaeis guineensis]
c131197_g1	681.07	111.65	123.78	56.75	74.67	64.75	161.98	126.98	129.93	gi|1035949199|gb|OAY72784.1| hypothetical protein ACMD2_07761 [Ananas comosus]
c150582_g1	679.45	667.45	661.51	222.25	217.25	217.33	160.82	144.82	143.05	gi|1033211150|gb|ANH58213.1| glutathione S-transferase [Dracaena cambodiana]
c138658_g2	674.5	635.28	640.5	423.54	414.54	406.9	511.76	529.95	525.76	gi|672152729|ref|XP_008797519.1| PREDICTED: aspartic proteinase oryzasin-1-like [Phoenix dactylifera] gi|672152731|ref|XP_008797520.1| PREDICTED: aspartic proteinase oryzasin-1-like [Phoenix dactylifera] gi|672152733|ref|XP_008797521.1| PREDICTED: aspartic proteinase oryzasin-1-like [Phoenix dactylifera] gi|672152735|ref|XP_008797522.1| PREDICTED: aspartic proteinase oryzasin-1-like [Phoenix dact…
c131283_g1	670.92	650.92	699.25	673.17	663.17	665.65	449.37	435.05	434.37	-
c141994_g2	669.95	591.09	569.98	303.69	224.33	219.8	578.54	380.42	360.64	-
c143202_g1	668.62	660.62	664.83	493.93	478.93	485.88	156.54	168.54	171.35	gi|242069983|ref|XP_002450268.1| hypothetical protein SORBIDRAFT_05g002860 [Sorghum bicolor] gi|241936111|gb|EES09256.1| hypothetical protein SORBI_005G034000 [Sorghum bicolor]
c119901_g1	662.23	642.23	610.92	203.04	193.04	226.11	680.96	739.5	665.96	-
c139772_g1	661.77	643.31	699.62	85.12	75.77	78.57	227.93	154.53	158.14	gi|848920679|ref|XP_012857187.1| PREDICTED: probable galactinol--sucrose galactosyltransferase 2 [Erythranthe guttata]
c150465_g2	660.85	736.69	417.43	182.77	137.15	150.01	647.36	424.33	381.65	gi|947068875|gb|KRH17766.1| hypothetical protein GLYMA_13G013900 [Glycine max] gi|947068878|gb|KRH17769.1| hypothetical protein GLYMA_13G014200 [Glycine max] gi|947068943|gb|KRH17834.1| hypothetical protein GLYMA_13G019900 [Glycine max]
c136511_g2	658.83	646.83	453.23	0	0	0	20.87	4.87	18.68	gi|475624714|gb|EMT32724.1| Aquaporin PIP2-1 [Aegilops tauschii]
c145835_g1	655.65	647.13	655.37	228.08	215.77	212.11	626.82	626.26	618.25	gi|672180700|ref|XP_008810549.1| PREDICTED: ADP,ATP carrier protein 1, mitochondrial-like [Phoenix dactylifera] gi|672180702|ref|XP_008810550.1| PREDICTED: ADP,ATP carrier protein 1, mitochondrial-like [Phoenix dactylifera] gi|672180704|ref|XP_008810551.1| PREDICTED: ADP,ATP carrier protein 1, mitochondrial-like [Phoenix dactylifera] gi|672180706|ref|XP_008810552.1| PREDICTED: ADP,ATP carrier pro…
c138649_g1	641.02	195.35	200.21	115.93	124.66	123.93	177.3	142.3	146.54	gi|672119127|ref|XP_008782794.1| PREDICTED: uncharacterized protein LOC103702242 [Phoenix dactylifera]
c138734_g1	640.75	621.27	674.25	459.65	434.04	410.93	1020.1	1221.98	1167.49	gi|743772332|ref|XP_010916473.1| PREDICTED: 60S ribosomal protein L26-2-like [Elaeis guineensis]
c144420_g1	640.72	484.93	508.42	447.33	353.41	332.12	659.25	558.7	553.49	gi|672176669|ref|XP_008808406.1| PREDICTED: probable L-ascorbate peroxidase 4 [Phoenix dactylifera]
c134656_g2	640.7	605.6	604.91	302.51	221.8	207.57	624.37	686.08	736.65	gi|743930792|ref|XP_011009655.1| PREDICTED: 60S ribosomal protein L18a-2 [Populus euphratica] gi|743930796|ref|XP_011009657.1| PREDICTED: 60S ribosomal protein L18a-2 [Populus euphratica]
c133414_g1	633.26	621.26	634.45	343.44	335.47	335.44	464.87	455.87	424.13	gi|341579606|gb|AEK81532.1| ethylene response factor [Ophiopogon japonicus]
c149014_g2	627.87	701.49	751.99	596.48	1049.91	1072.68	442.58	609.94	511.65	-
c126994_g2	623.87	627.48	685.64	376.1	323.7	331.99	941.11	964.05	966.78	gi|399525614|gb|AFP44118.1| cyclophilin [Lycoris longituba]
c150242_g3	623.81	650.18	671.35	320.72	304.15	312.62	440.88	399.03	431.13	gi|586755366|ref|XP_006853053.1| PREDICTED: 14-3-3-like protein [Amborella trichopoda] gi|548856692|gb|ERN14520.1| hypothetical protein AMTR_s00038p00055100 [Amborella trichopoda]
c138841_g4	623.43	492.12	477.29	216.46	167.1	169.96	491.8	376.41	365.2	gi|743799764|ref|XP_010925579.1| PREDICTED: transcription elongation factor 1 homolog [Elaeis guineensis] gi|743799766|ref|XP_010925580.1| PREDICTED: transcription elongation factor 1 homolog [Elaeis guineensis] gi|743799768|ref|XP_010925581.1| PREDICTED: transcription elongation factor 1 homolog [Elaeis guineensis] gi|743799770|ref|XP_010925582.1| PREDICTED: transcription elongation factor 1 hom…
c148398_g5	621.66	669.39	651.89	669.92	686.5	661.84	803.87	766.85	825.46	gi|297741463|emb|CBI32594.3| unnamed protein product [Vitis vinifera]
c138093_g12	619.38	523.23	537.43	329.68	286.39	267.91	366.49	309.87	319.31	gi|567894294|ref|XP_006439635.1| hypothetical protein CICLE_v10022669mg [Citrus clementina] gi|567894296|ref|XP_006439636.1| hypothetical protein CICLE_v10022669mg [Citrus clementina] gi|567894302|ref|XP_006439639.1| hypothetical protein CICLE_v10022669mg [Citrus clementina] gi|557541897|gb|ESR52875.1| hypothetical protein CICLE_v10022669mg [Citrus clementina] gi|557541898|gb|ESR52876.1| hypothet…
c142881_g3	617.94	606.81	646.21	222.01	204.42	217.11	677.45	576.32	592.91	gi|720006459|ref|XP_010257988.1| PREDICTED: cleavage stimulation factor subunit 1 isoform X1 [Nelumbo nucifera] gi|720006462|ref|XP_010257989.1| PREDICTED: cleavage stimulation factor subunit 1 isoform X1 [Nelumbo nucifera]
c142011_g2	615.21	516.06	537.66	326.36	261.98	277.16	941.34	840.07	849.3	gi|729425930|ref|XP_010559218.1| PREDICTED: ADP-ribosylation factor 2-like, partial [Tarenaya hassleriana]
c129975_g3	613.86	576.04	599.48	854.91	817.78	765.86	571.03	512.9	444.65	gi|899115|gb|AAA96951.1| polyubiquitin, partial [Solanum tuberosum]
c137079_g1	610.35	561.69	563.56	384.18	401.03	368.72	858.85	725.18	732.95	gi|661882967|emb|CDP13175.1| unnamed protein product [Coffea canephora]
c136633_g2	607.93	658.03	682.01	340.19	326.47	347.22	810.6	851.06	851.41	gi|734385360|gb|KHN24672.1| 60S ribosomal protein L23, partial [Glycine soja]
c129823_g2	606.96	691.35	646.5	279.74	257.11	260.31	715.22	684.13	719.45	gi|575840978|gb|AHH02384.1| putative actin family protein isoform, partial [Aegiceras corniculatum]
c150451_g3	605.29	514.85	529.45	176.5	176.82	175.44	432.95	480.76	471.65	gi|720064412|ref|XP_010275944.1| PREDICTED: phosphoglycerate kinase, cytosolic [Nelumbo nucifera]
c141195_g3	603.97	707.36	722.94	0.57	0.53	0.36	1.91	1.6	2.22	gi|672122858|ref|XP_008784772.1| PREDICTED: bifunctional epoxide hydrolase 2-like isoform X3 [Phoenix dactylifera]
c118239_g3	602.24	512.38	484.52	530.98	592.79	547.74	754.91	641.98	574.92	gi|743767378|ref|XP_010913950.1| PREDICTED: ADP,ATP carrier protein 1, mitochondrial-like [Elaeis guineensis] gi|743767380|ref|XP_010913951.1| PREDICTED: ADP,ATP carrier protein 1, mitochondrial-like [Elaeis guineensis]
c136628_g2	600.78	594.47	585.78	199.94	146.8	147.32	258.91	180.97	181.64	gi|720011568|ref|XP_010259606.1| PREDICTED: stress-related protein-like [Nelumbo nucifera]
c139343_g1	600.33	592.33	715.03	70.15	55.15	95.36	57.34	69.34	76.17	-
c139669_g5	599.19	526.68	515.88	202.46	174.4	207.78	310.16	300.18	259.32	gi|548839122|gb|ERM99436.1| hypothetical protein AMTR_s00131p00085180, partial [Amborella trichopoda]
c148441_g1	594.69	746.74	744.8	7.92	16.74	16.06	276.33	274.77	259.92	gi|743779414|ref|XP_010920173.1| PREDICTED: trans-resveratrol di-O-methyltransferase-like [Elaeis guineensis]
c144528_g3	593.88	195.68	189.54	292.18	88.44	89.25	376.55	209.53	211.04	gi|672166954|ref|XP_008803418.1| PREDICTED: uncharacterized protein LOC103716973 [Phoenix dactylifera] gi|672209129|ref|XP_008780621.1| PREDICTED: uncharacterized protein LOC103700457 [Phoenix dactylifera]
c139531_g1	592.12	459.04	458.85	244.72	187.76	183.21	578.83	516.85	509.02	gi|672192948|ref|XP_008775907.1| PREDICTED: uncharacterized protein OsI_027940-like [Phoenix dactylifera]
c135175_g1	591.58	505.17	526.27	316.78	215.79	194.26	490.19	460.49	475.5	gi|743772134|ref|XP_010916367.1| PREDICTED: uncharacterized protein LOC105041202 [Elaeis guineensis]
c141516_g2	588.43	434.54	453.71	82.77	55.94	52.72	182.96	176.9	171.92	gi|695072457|ref|XP_009383349.1| PREDICTED: fructokinase-1-like [Musa acuminata subsp. malaccensis] gi|695072459|ref|XP_009383350.1| PREDICTED: fructokinase-1-like [Musa acuminata subsp. malaccensis]
c146116_g3	584.58	537.99	566.58	234.93	229.93	230.06	390.89	388.57	372.89	gi|1035907996|gb|OAY37593.1| hypothetical protein MANES_11G113100 [Manihot esculenta]
c133143_g1	583.55	90.76	94.79	52.35	66.42	60.35	136.06	101.06	103.2	gi|743868482|ref|XP_010905583.1| PREDICTED: uncharacterized protein LOC105032743 [Elaeis guineensis]
c145594_g1	582.94	681	682.26	128.88	200.6	191.94	264.77	355.27	353.74	gi|743789069|ref|XP_010922826.1| PREDICTED: 2,3-bisphosphoglycerate-independent phosphoglycerate mutase [Elaeis guineensis]
c108625_g1	580.42	213.75	273.46	97.83	96.86	105.83	484.69	449.69	451.14	gi|1035960745|gb|OAY81605.1| Peroxiredoxin-2C [Ananas comosus]
c139991_g1	580.36	657.51	666.31	293	371.28	362.19	462.11	527.3	551.19	gi|399525592|gb|AFP44108.1| GAPDH, partial [Lycoris longituba]
c146619_g2	579.55	705.8	680.31	445.8	374.59	363.6	1132.62	1022.47	995.61	gi|743806980|ref|XP_010927913.1| PREDICTED: 60S ribosomal protein L5-like isoform X2 [Elaeis guineensis]
c121091_g1	578.36	534.7	646.94	442.56	400.81	466.81	1023.91	949.35	879.64	gi|728845849|gb|KHG25292.1| 60S ribosomal L37-1 -like protein [Gossypium arboreum]
c146613_g1	577.59	558.64	596.84	461.96	447.49	431.56	733.65	716.56	724.83	gi|743799501|ref|XP_010925494.1| PREDICTED: protein argonaute 2-like [Elaeis guineensis]
c142750_g5	576.94	585.44	602.73	315.91	303.76	302.74	652.99	754.84	768.26	gi|1732359|gb|AAC06383.1| elongation factor 1 alpha, partial [Malus domestica]
c141447_g3	576.37	517.31	539.66	261.57	264.53	264.15	687.69	664.48	672.39	gi|672122818|ref|XP_008784751.1| PREDICTED: uncharacterized protein LOC103703620 [Phoenix dactylifera]
c131482_g1	574.47	487.59	522.5	140.22	136.33	137.75	367.2	360.23	360.35	gi|719998640|ref|XP_010255464.1| PREDICTED: membrane steroid-binding protein 2-like [Nelumbo nucifera]
c179112_g1	573.47	450.99	538.03	301.13	202.09	227.18	483.27	331.44	299.35	gi|284927592|gb|ADC29516.1| polyubiquitin, partial [Citrus sinensis] gi|376008204|gb|AFB18313.1| ubiquitin, partial [Citrus maxima]
c133763_g1	572.83	580.88	597	105.17	102.42	100.47	206.35	203.37	243.9	gi|566202015|ref|XP_006374886.1| cysteine proteinase [Populus trichocarpa] gi|118486542|gb|ABK95110.1| unknown [Populus trichocarpa] gi|550323195|gb|ERP52683.1| cysteine proteinase [Populus trichocarpa]
c140448_g1	571.04	436.25	435.82	186.97	144.59	146.74	719.47	607.65	655.25	gi|1035947738|gb|OAY71691.1| 40S ribosomal protein S25-4 [Ananas comosus]
c146408_g3	567.36	549.23	549.36	428.82	423.82	406.44	673.41	673.06	655.41	gi|743808472|ref|XP_010928349.1| PREDICTED: polyadenylate-binding protein 2-like isoform X1 [Elaeis guineensis]
c134117_g2	563.93	433.69	453.93	252.85	206.99	216.3	778.89	760.59	753.63	gi|743862614|ref|XP_010943581.1| PREDICTED: 60S ribosomal protein L6-like [Elaeis guineensis]
c136981_g6	557.58	515.6	570.04	253.6	225.31	216.84	725.68	772.11	782.31	gi|743777180|ref|XP_010919010.1| PREDICTED: 40S ribosomal protein S17-like [Elaeis guineensis]
c146328_g2	555.51	412.62	407.2	677.58	498.03	478.26	1755.53	1223.72	1273.51	gi|255677013|dbj|BAF19470.2| Os06g0336200, partial [Oryza sativa Japonica Group]
c138316_g1	555.36	521.1	530.36	227.37	195.83	192.37	688.61	663.61	676.55	gi|947123562|gb|KRH71768.1| hypothetical protein GLYMA_02G167900 [Glycine max]
c147388_g1	554.91	395.71	395.43	138.82	146.55	146.02	447.97	315.01	315.01	gi|1035934895|gb|OAY63864.1| La-related protein 6B [Ananas comosus]
c145040_g1	552.7	228.25	234.02	206.81	179.04	181.14	511.88	464.4	480.55	gi|720078064|ref|XP_010241237.1| PREDICTED: 40S ribosomal protein S2-3-like [Nelumbo nucifera]
c146567_g1	552	532	503.21	328.01	318.01	300.51	548.69	529.13	533.69	gi|641830290|gb|KDO49381.1| hypothetical protein CISIN_1g0277592mg [Citrus sinensis]
c139434_g3	551.82	453.32	464.16	235.88	236.77	232.38	672.24	621.56	614.5	gi|20139942|sp|Q9M3V8.1|RS6_ASPOF RecName: Full=40S ribosomal protein S6 gi|7649387|emb|CAB89081.1| S6 ribosomal protein [Asparagus officinalis]
c138223_g1	550.73	431.8	425.05	1.75	10.85	9.28	11.02	14.66	12.11	-
c149239_g3	550.59	532.08	540.59	316.34	290.36	299.91	417.23	400.65	399.72	gi|596049492|ref|XP_007220500.1| hypothetical protein PRUPE_ppa014138mg [Prunus persica] gi|462416962|gb|EMJ21699.1| hypothetical protein PRUPE_ppa014138mg [Prunus persica]
c149813_g1	550.21	530.21	545.1	228.35	218.35	206.07	301.02	282.69	286.02	gi|743827609|ref|XP_010933632.1| PREDICTED: dnaJ protein homolog isoform X1 [Elaeis guineensis]
c146958_g1	548.54	445.87	449.68	401.53	347.39	337.69	596.99	456.92	475.74	gi|835974307|ref|XP_012701475.1| PREDICTED: uncharacterized protein LOC101763014 [Setaria italica]
c144274_g3	546.14	404.15	448.94	150.01	132.07	144.8	704.02	585	616.39	gi|445068900|gb|AGE15419.1| S-adenosyl-L-methionine synthetase [Hosta ventricosa]
c133863_g1	542.48	262.51	253.89	169.27	184.49	177.27	248.04	213.04	235.87	gi|672183422|ref|XP_008811988.1| PREDICTED: uncharacterized protein LOC103722996 [Phoenix dactylifera]
c143076_g3	539.26	524.26	529.15	222.49	211.06	217.49	546.89	522.82	538.89	gi|695054101|ref|XP_009415169.1| PREDICTED: reticulon-like protein B2 [Musa acuminata subsp. malaccensis]
c133881_g1	539.23	394.95	387.68	126.39	81.56	87.67	363.22	258.54	261.96	gi|672196599|ref|XP_008776845.1| PREDICTED: protein SDE2 homolog [Phoenix dactylifera]
c134593_g6	538.51	504.86	537.98	90.95	97.9	95.16	221.56	227.08	216.38	gi|387600326|gb|AFJ92671.1| ERD protein [Vitis amurensis]
c136739_g1	537.68	417.42	405.55	521.05	480.32	495.47	1528.97	1224.38	1262.16	gi|743802053|ref|XP_010926507.1| PREDICTED: non-specific lipid-transfer protein 2-like [Elaeis guineensis]
c97019_g1	536.18	516.34	530.96	116.31	120.25	108.9	579.58	542.89	575.44	gi|743793268|ref|XP_010923889.1| PREDICTED: polyadenylate-binding protein RBP45-like [Elaeis guineensis]
c150213_g4	529.61	656.2	686.96	639.08	642.28	628.17	915.9	877.95	860.12	gi|802555639|ref|XP_012065548.1| PREDICTED: ADP,ATP carrier protein 1, mitochondrial [Jatropha curcas] gi|643737353|gb|KDP43465.1| hypothetical protein JCGZ_16752 [Jatropha curcas]
c140079_g1	528.96	568.9	576.48	475.98	329.65	336.98	1095.34	839.45	811.69	gi|548859164|gb|ERN16865.1| hypothetical protein AMTR_s00057p00145850 [Amborella trichopoda]
c143185_g1	528.85	323.93	357.18	338.63	198.9	202.64	521.42	473.78	478.44	gi|672183350|ref|XP_008811949.1| PREDICTED: calmodulin-7 isoform X1 [Phoenix dactylifera]
c144607_g3	528.51	404.78	412.81	205.34	145.92	143.86	390.04	253.53	249.99	gi|720017313|ref|XP_010261428.1| PREDICTED: delta(8)-fatty-acid desaturase-like [Nelumbo nucifera]
c143240_g1	528.35	458.42	468.77	187.72	135.56	146.96	409.89	233.28	225.57	gi|743821202|ref|XP_010931977.1| PREDICTED: mitochondrial Rho GTPase 1-like isoform X1 [Elaeis guineensis]
c139772_g5	527.4	515.4	516.75	57.08	52.08	52.41	157.19	141.19	144.1	gi|1035942931|gb|OAY68448.1| putative galactinol--sucrose galactosyltransferase 2 [Ananas comosus]
c142564_g1	527.07	169.44	183.35	74.33	84.51	82.33	208.36	173.36	171.1	gi|743781027|ref|XP_010920723.1| PREDICTED: 11S globulin seed storage protein 2-like [Elaeis guineensis]
c148331_g1	526.6	506.6	512.71	413.62	403.62	397.2	1131.46	1138.92	1116.46	-
c147165_g1	526.17	416.66	392.04	162.26	121	126.81	6454.53	3946.03	3997.34	gi|702321699|ref|XP_010052841.1| PREDICTED: peroxidase 42-like [Eucalyptus grandis] gi|629112002|gb|KCW76962.1| hypothetical protein EUGRSUZ_D01322 [Eucalyptus grandis]
c146746_g3	525.77	513.77	516.75	707.04	696.4	699.04	478.13	469.13	442.36	-
c136140_g1	525.32	592.62	596.08	168.61	208.11	242.78	323.89	426.73	426.23	gi|300432694|gb|ADK13064.1| conserved hypothetical protein 7 [Hevea brasiliensis]
c143701_g2	524.76	504.76	500.88	263.31	253.31	245.67	395.62	379.48	380.62	gi|743837205|ref|XP_010936330.1| PREDICTED: probable mitochondrial-processing peptidase subunit beta [Elaeis guineensis]
c135258_g3	523.99	427.52	465.41	349.75	225.43	229.89	496.22	308.38	303.16	gi|121277814|gb|ABM53028.1| profilin [Cocos nucifera]
c137032_g2	523.31	584.42	572.93	293.93	240.88	240.85	341.94	347.41	358.55	gi|923512566|ref|XP_013750266.1| PREDICTED: ubiquitin-conjugating enzyme E2 28-like [Brassica napus]
c149869_g4	520.6	496.14	494.77	491.94	492.5	496.25	538.53	479.64	461.87	gi|672167551|ref|XP_008803742.1| PREDICTED: inositol-3-phosphate synthase isoform X1 [Phoenix dactylifera]
c145412_g5	519.45	425.65	480.35	331.38	245.51	235.78	481.39	416.41	409.08	gi|727512191|ref|XP_010432381.1| PREDICTED: V-type proton ATPase subunit c1-like [Camelina sativa]
c50806_g1	517.33	439.37	436.81	495.88	472.99	423.73	480.49	482.03	477.23	-
c139229_g1	517.14	523.6	500.86	355.28	390.81	377.77	618.27	535.61	539.86	gi|413953370|gb|AFW86019.1| hypothetical protein ZEAMMB73_433257, partial [Zea mays]
c134980_g2	512.06	477.97	466.8	226.85	253.61	255.84	602.5	637.75	658.21	gi|629083965|gb|KCW50322.1| hypothetical protein EUGRSUZ_J00099 [Eucalyptus grandis]
c150645_g1	510.01	435.06	435.65	169.56	150.17	151.02	230.05	218.33	217.82	gi|672200038|ref|XP_008777772.1| PREDICTED: pyruvate kinase, cytosolic isozyme-like [Phoenix dactylifera]
c136660_g11	505.21	391.23	419.09	377.54	207.29	213.99	465.43	363.63	348.81	gi|15227232|ref|NP_179244.1| ATPase, F0/V0 complex, subunit C protein [Arabidopsis thaliana] gi|15234868|ref|NP_195603.1| vacuolar-type H(+)-ATPase C3 [Arabidopsis thaliana] gi|15236183|ref|NP_195198.1| vacuolar H+-pumping ATPase C1 [Arabidopsis thaliana] gi|224080484|ref|XP_002306142.1| Vacuolar ATP synthase 16 kDa proteolipid subunit 1/3/5 family protein [Populus trichocarpa] gi|225459575|ref|X…
c141146_g2	505.16	487.16	477.62	69.22	62.84	66.55	233.05	272.03	261.05	gi|675295642|gb|AIL54541.1| norbelladine 4&apos;-O-methyltransferase [Narcissus aff. pseudonarcissus MK-2014]
c121401_g1	503.59	486.68	515	661.44	485.91	450.44	356.43	309.83	283.26	gi|743769563|ref|XP_010915074.1| PREDICTED: probable choline kinase 2 [Elaeis guineensis]
c104269_g1	499.51	581.81	563.59	28.03	26.76	19.96	59.68	56.93	47.97	-
c140552_g1	495.01	461.71	470.01	301.38	248.68	266.38	461.85	436.85	439.38	gi|743820740|ref|XP_010931859.1| PREDICTED: lactoylglutathione lyase [Elaeis guineensis]
c144012_g10	491.77	379.84	400.41	214.16	145.68	139.83	331.63	231.36	243.65	gi|567852459|ref|XP_006419393.1| hypothetical protein CICLE_v10006081mg [Citrus clementina] gi|568871341|ref|XP_006488847.1| PREDICTED: universal stress protein A-like protein [Citrus sinensis] gi|557521266|gb|ESR32633.1| hypothetical protein CICLE_v10006081mg [Citrus clementina]
c145440_g1	490.08	529.74	465.08	314.67	323.99	279.67	213.55	188.55	179.16	gi|672131740|ref|XP_008789436.1| PREDICTED: glutathione reductase, cytosolic [Phoenix dactylifera] gi|672131742|ref|XP_008789437.1| PREDICTED: glutathione reductase, cytosolic [Phoenix dactylifera] gi|672131744|ref|XP_008789438.1| PREDICTED: glutathione reductase, cytosolic [Phoenix dactylifera]
c56040_g1	485.91	337.72	352.92	82.13	77	74.78	159.01	144.78	108.52	gi|695073535|ref|XP_009383939.1| PREDICTED: Werner Syndrome-like exonuclease [Musa acuminata subsp. malaccensis]
c132684_g2	483.6	447.15	471.54	144.64	195.58	183.79	518.27	498.54	479.63	gi|672123610|ref|XP_008785173.1| PREDICTED: heterogeneous nuclear ribonucleoprotein 1-like [Phoenix dactylifera]
c149119_g1	483.04	463.04	461.45	444.99	434.99	448.82	516.01	489.14	501.01	gi|28566348|gb|AAO43186.1| S-adenosylmethionine decarboxylase [Narcissus pseudonarcissus]
c131179_g1	481.91	416.49	435.08	190.14	172.7	162.83	774.66	786.3	776.55	gi|144226181|dbj|BAF56180.1| glutathione S-transferase [Allium cepa]
c144841_g1	481.56	469.56	475.84	383.41	391.1	375.41	522.4	513.4	499.42	gi|1035961973|gb|OAY82647.1| Malate dehydrogenase, cytoplasmic [Ananas comosus]
c149311_g1	480.69	324.17	348.71	72.09	67.11	48.22	660.1	493.48	539.09	-
c101423_g1	479.99	430.58	395.89	223.85	184.04	178.26	328.5	259.63	255.61	-
c148715_g1	478.2	364.37	368.05	463.33	447.33	429.35	670.21	571.4	584.02	gi|976924565|gb|KVI08516.1| Actin/actin-like conserved site-containing protein [Cynara cardunculus var. scolymus]
c142917_g2	476.99	310.45	340.64	82.79	73.36	66.35	72.39	72.86	67.87	gi|743763391|ref|XP_010911877.1| PREDICTED: subtilisin-like protease SBT3.3 [Elaeis guineensis] gi|743763393|ref|XP_010911878.1| PREDICTED: subtilisin-like protease SBT3.3 [Elaeis guineensis]
c107689_g2	476.7	322.99	335.05	412.61	389.5	403.32	782.55	637.66	668.8	gi|514813265|ref|XP_004981416.1| PREDICTED: histone H1-like [Setaria italica]
c109531_g1	476.65	310.93	424.67	158.7	123.51	88.97	176.33	130.18	90.42	gi|1035899199|gb|OAY28800.1| hypothetical protein MANES_15G095300 [Manihot esculenta]
c142351_g4	476.5	442.73	454.5	286.04	273.21	274.04	212.39	225.63	222.39	gi|1029085808|ref|XP_016703107.1| PREDICTED: glutamate decarboxylase [Gossypium hirsutum]
c132531_g3	473.88	356.89	362.61	363.53	272.05	284.97	737.99	554.96	522.53	gi|944236707|gb|KQL01045.1| hypothetical protein SETIT_015044mg, partial [Setaria italica]
c143809_g2	473.75	383.85	402.18	766.57	650.28	649.8	415.12	358.72	350.57	gi|743763913|ref|XP_010912157.1| PREDICTED: LOW QUALITY PROTEIN: CBL-interacting protein kinase 6-like [Elaeis guineensis]
c148770_g2	470.51	481.78	472.29	206.62	179.5	177.55	514.73	431.62	490.97	gi|162708014|gb|ABY19575.1| actin [Ipomoea batatas]
c149111_g1	470.42	237.71	219.91	214.4	228.44	222.4	197.11	162.11	153.83	gi|743831361|ref|XP_010934672.1| PREDICTED: uncharacterized protein LOC105054780 [Elaeis guineensis] gi|743831363|ref|XP_010934673.1| PREDICTED: uncharacterized protein LOC105054780 [Elaeis guineensis]
c138605_g1	470.24	420.35	436.24	277.59	268.59	271.65	641.4	670.52	655.4	gi|590568247|ref|XP_007010737.1| Alpha chain of nascent polypeptide associated complex [Theobroma cacao] gi|508727650|gb|EOY19547.1| Alpha chain of nascent polypeptide associated complex [Theobroma cacao]
c140030_g2	467.63	459.11	484.76	128.17	115.86	116.1	169.26	166.79	160.69	gi|672107908|ref|XP_008782405.1| PREDICTED: uncharacterized protein LOC103701943 isoform X2 [Phoenix dactylifera]
c141875_g1	467.39	345.2	355.19	370.16	269.05	262.97	250.6	223.38	223.64	gi|694370451|ref|XP_009363016.1| PREDICTED: iron-sulfur cluster assembly protein 1-like [Pyrus x bretschneideri]
c141345_g3	466.36	454.36	425.08	452.8	447.8	433.02	438.61	422.61	389.02	gi|661877042|emb|CDP19065.1| unnamed protein product [Coffea canephora]
c138592_g1	462.26	451.03	444.26	289.91	284.91	256.76	223.59	214.3	205.59	gi|672198903|ref|XP_008777466.1| PREDICTED: autophagy-related protein 8C isoform X1 [Phoenix dactylifera]
c148899_g2	461.56	433.82	450.68	36.65	23.15	23.19	69.36	52.83	51.12	gi|32816178|gb|AAP88406.1| flavonoid glucosyl-transferase [Allium cepa]
c149800_g3	461.44	597.32	456.22	261.18	174.79	253.77	208.86	217.17	204.72	-
c145341_g4	460.79	290.19	302.13	115.34	80.52	76.87	185.87	128.63	139.45	gi|297743874|emb|CBI36844.3| unnamed protein product [Vitis vinifera]
c140575_g3	457.33	310.17	334.75	133.37	120.91	121.2	328.21	275.65	265.23	-
c123846_g2	456.32	337.3	358.77	530.34	436.29	427.77	700.92	528.86	520.93	gi|743805396|ref|XP_010927429.1| PREDICTED: uncharacterized protein LOC105049471 [Elaeis guineensis]
c133915_g2	453.81	328.77	345.36	187.13	134.27	136.42	583.12	435.82	416.88	-
c135258_g2	453.45	331.74	350.38	203.91	169.46	176.38	418.96	379.03	372.28	gi|330318582|gb|AEC10960.1| profilin 2 [Camellia sinensis]
c144254_g2	452.67	386.52	403.13	143.98	107.93	112.61	514.42	495.99	500.98	gi|351727827|ref|NP_001237174.1| uncharacterized protein LOC100306077 [Glycine max] gi|255627461|gb|ACU14075.1| unknown [Glycine max]
c136129_g1	452.31	346.46	358.2	63.65	54.04	52.28	51.03	41.25	41.94	-
c141020_g1	451.55	386.86	395.33	221.4	168.65	167.88	539.93	488.8	503.39	gi|379047208|gb|AFC88125.1| S-adenosylmethionine synthetase [Lycoris radiata]
c141354_g1	451.55	436.55	443.45	185.74	181.99	180.74	291	291.68	283	gi|672141012|ref|XP_008794325.1| PREDICTED: 26S protease regulatory subunit 6A homolog [Phoenix dactylifera]
c149805_g2	450.31	445.31	467.51	244.04	236.04	220.17	759.7	804.12	752.7	gi|720038548|ref|XP_010268013.1| PREDICTED: calreticulin [Nelumbo nucifera]
c143011_g1	450.2	369.85	353.27	382.6	247.42	243.47	667.17	678.05	695.63	gi|743866826|ref|XP_010905161.1| PREDICTED: 40S ribosomal protein S8-like [Elaeis guineensis]
c144113_g2	449.59	373.63	374.68	51.9	40.09	44.54	129.43	89.78	81.46	gi|1035938805|gb|OAY66025.1| putative carboxylesterase 2 [Ananas comosus]
c148661_g2	448.8	369.77	394.58	245.7	199.3	197.04	116.11	92.55	100.11	gi|725827525|gb|AIY34664.1| 4-coumarate:CoA ligase-like protein [Ornithogalum longebracteatum]
c147731_g1	447.13	462.75	473.5	222.84	201.43	202.34	1291.2	1124.66	1145.05	gi|947110522|gb|KRH58848.1| hypothetical protein GLYMA_05G152000 [Glycine max]
c135966_g4	446.15	349.91	375.33	393.31	235.99	221.86	521.35	475.8	495.75	gi|1029022514|ref|XP_016675060.1| PREDICTED: polyadenylate-binding protein 8-like [Gossypium hirsutum]
c128530_g1	443.54	418.95	418.54	78.46	37.21	43.46	430.09	405.09	402.42	gi|1002649811|gb|AMN16535.1| sucrose synthase [Ornithogalum longebracteatum]
c142519_g2	443.13	431.13	410.61	268	263	234.3	675.61	659.61	670.66	gi|1035909046|gb|OAY38641.1| hypothetical protein MANES_10G031400 [Manihot esculenta]
c92980_g1	443.12	335.14	391.95	316.14	258.32	207.39	760.79	654.42	555.27	gi|1009152512|ref|XP_015894135.1| PREDICTED: 60S ribosomal protein L7-2 [Ziziphus jujuba]
c133764_g1	442.56	441.73	466.94	207.13	281.69	263.44	771.4	844.5	816.97	gi|238632211|gb|ACR50977.1| 60s ribosomal protein L21 [Lycoris radiata]
c131830_g3	440.86	428.86	423.03	25.12	18.81	17.12	182.81	173.81	181.59	gi|353441130|gb|AEQ94149.1| sucrose synthase1 [Elaeis guineensis]
c138543_g3	439.98	309.37	310.57	546.06	446.78	442.23	1872.11	1706.34	1761.99	gi|403329894|gb|AFR42229.1| beta-tubulin, partial [Populus alba]
c133266_g2	437.91	417.91	420.13	95.44	85.44	75.18	194.69	175.23	179.69	gi|672132902|ref|XP_008790044.1| PREDICTED: la-related protein 6A [Phoenix dactylifera]
c144178_g1	436.34	428.34	446.93	329.03	314.03	320.75	805.55	817.55	789.38	gi|1035955458|gb|OAY77244.1| Calnexin [Ananas comosus]
c127590_g1	436	320.94	314.95	31.86	28.48	31.93	1219.76	915.44	950.8	-
c142677_g2	434.79	294.85	301.92	82.69	78.17	72.47	331.61	266.74	271.38	gi|720071386|ref|XP_010278048.1| PREDICTED: serine/arginine-rich splicing factor RSZ22-like [Nelumbo nucifera] gi|720071390|ref|XP_010278049.1| PREDICTED: serine/arginine-rich splicing factor RSZ22-like [Nelumbo nucifera] gi|720071393|ref|XP_010278050.1| PREDICTED: serine/arginine-rich splicing factor RSZ22-like [Nelumbo nucifera]
c143406_g3	433.9	353.26	364.35	165.06	128.53	132.62	279.8	214.21	200.45	gi|743757050|ref|XP_010919994.1| PREDICTED: 14-3-3-like protein D isoform X1 [Elaeis guineensis]
c139985_g2	433.7	315.62	319.74	38.78	20.4	23.38	181.47	124.26	136.66	gi|743756589|ref|XP_010917707.1| PREDICTED: probable aquaporin TIP4-3 [Elaeis guineensis]
c136187_g2	433.4	424.88	420.31	274.95	262.64	250.03	409.5	404.95	400.93	gi|1035944314|gb|OAY69356.1| putative ATP synthase 24 kDa subunit, mitochondrial [Ananas comosus]
c98640_g1	433.03	411.67	431.51	36.03	26.55	35.09	176.63	153.14	162.81	gi|527202938|gb|EPS69559.1| hypothetical protein M569_05207, partial [Genlisea aurea]
c146103_g2	432.8	458.06	501.24	638.35	621.14	620.83	344.93	281.01	282.18	-
c144841_g2	431.29	421.33	414.85	477.09	442.52	378.14	270.38	185.32	213.23	gi|502116331|ref|XP_004495378.1| PREDICTED: malate dehydrogenase [Cicer arietinum]
c26557_g1	431.23	377.3	399.41	397.26	327.53	368.73	439.44	380.67	382.72	gi|719964489|ref|XP_010252842.1| PREDICTED: uncharacterized protein LOC104594297 [Nelumbo nucifera]
c139110_g9	429.53	381.42	401.26	112.53	87.02	83.15	37.03	21	18.09	gi|470127617|ref|XP_004299764.1| PREDICTED: uncharacterized protein LOC101305665 [Fragaria vesca subsp. vesca]
c137812_g1	429.38	424.38	428.43	36.32	28.32	15.94	157.96	156.6	150.96	gi|672179367|ref|XP_008809854.1| PREDICTED: pectinesterase-like [Phoenix dactylifera]
c149580_g2	428.19	408.19	426.39	226.37	216.37	209.65	396.55	395.41	381.55	gi|1023970207|gb|KZV16913.1| 26S proteasome regulatory subunit 4A, partial [Dorcoceras hygrometricum]
c134891_g1	426.76	395.28	408.76	166.62	161.62	160.42	430.22	413.17	412.22	-
c133650_g2	426.7	465.27	478	298.39	223.23	230.3	882.85	738.91	726.46	gi|769825562|ref|XP_011622020.1| PREDICTED: 40S ribosomal protein S9-2 [Amborella trichopoda]
c145484_g3	426.4	397.49	399.57	88.18	84.98	80.85	363.31	263.15	251.34	-
c139669_g4	423.97	401.01	398.97	198.25	170.07	163.25	281.44	256.44	264.84	gi|567868389|ref|XP_006426817.1| hypothetical protein CICLE_v10025679mg [Citrus clementina] gi|557528807|gb|ESR40057.1| hypothetical protein CICLE_v10025679mg [Citrus clementina]
c145935_g3	423.88	272.48	283.57	231.64	100.71	118.55	431.13	225.83	194.39	gi|719991388|ref|XP_010253251.1| PREDICTED: probable ADP-ribosylation factor GTPase-activating protein AGD6 [Nelumbo nucifera]
c145310_g2	423.78	329.49	330.96	200.29	127.82	126.04	404.35	239.6	235.85	gi|296086416|emb|CBI32005.3| unnamed protein product [Vitis vinifera]
c140043_g2	422.68	498.35	516.42	321.64	281.8	292.65	764.75	752.49	779.15	gi|743778336|ref|XP_010919627.1| PREDICTED: 60S ribosomal protein L15 isoform X1 [Elaeis guineensis]
c148000_g2	420.95	328.51	323.06	313.2	234.44	240.04	373.66	294.54	300.59	gi|743865569|ref|XP_010904863.1| PREDICTED: uncharacterized protein LOC105032185 [Elaeis guineensis] gi|743865573|ref|XP_010904864.1| PREDICTED: uncharacterized protein LOC105032185 [Elaeis guineensis]
c143836_g1	420.92	376.88	390.17	159.36	136.9	135.3	390.4	342.8	332.41	gi|672165456|ref|XP_008802630.1| PREDICTED: T-complex protein 1 subunit epsilon [Phoenix dactylifera]
c142019_g3	419.91	353.01	356.62	0.25	0.08	0.13	33.87	22.2	18.94	gi|743791111|ref|XP_010923339.1| PREDICTED: uncharacterized protein LOC105046447 [Elaeis guineensis]
c148945_g1	418.29	386.12	396.97	606.93	656.72	668.63	800.26	760.17	750.86	gi|694994549|ref|XP_009409422.1| PREDICTED: remorin-like [Musa acuminata subsp. malaccensis]
c146679_g2	418.09	398.09	410.39	139.11	129.11	128.67	187.06	213.64	172.06	gi|965609221|dbj|BAT95712.1| hypothetical protein VIGAN_08248600 [Vigna angularis var. angularis]
c146614_g5	417.46	355.99	363.74	175.3	142.13	133.72	383.09	366.95	370.86	gi|1035934493|gb|OAY63496.1| Nucleolin 2 [Ananas comosus]
c148412_g2	414.1	365.4	399.39	206.66	138.36	142.85	436.87	313.81	320.73	gi|672190698|ref|XP_008775317.1| PREDICTED: heat shock 70 kDa protein 14-like [Phoenix dactylifera]
c117336_g1	413.89	373.73	379.89	229.81	220.81	218.03	223.15	230.95	237.15	gi|3551952|gb|AAC34854.1| senescence-associated protein 4 [Hemerocallis hybrid cultivar]
c135951_g1	412.79	404.79	416.87	87.77	72.77	68.34	566.35	578.35	569.7	gi|672119073|ref|XP_008782763.1| PREDICTED: uncharacterized protein LOC103702207 [Phoenix dactylifera]
c143517_g2	411.86	358.2	382.33	284.51	148.16	149.74	309.25	189.55	186.67	gi|629084050|gb|KCW50407.1| hypothetical protein EUGRSUZ_J00155, partial [Eucalyptus grandis]
c134584_g7	411.75	391.75	389.84	154.21	144.21	141.37	227.38	222.19	212.38	gi|672108731|ref|XP_008786494.1| PREDICTED: uncharacterized protein LOC103704817 [Phoenix dactylifera]
c131260_g2	411.64	383.22	386.64	127.75	93.4	92.75	260.75	235.75	228.02	gi|695014196|ref|XP_009393908.1| PREDICTED: MKI67 FHA domain-interacting nucleolar phosphoprotein-like isoform X1 [Musa acuminata subsp. malaccensis]
c143252_g3	411.08	307	345.84	316.58	340.39	319.28	153.86	119.4	120.15	gi|695025320|ref|XP_009399910.1| PREDICTED: expansin-A2-like [Musa acuminata subsp. malaccensis]
c141531_g1	410.97	390.97	390.75	31.33	21.33	22.87	136.49	123.46	121.49	gi|743793525|ref|XP_010923950.1| PREDICTED: pectinesterase-like [Elaeis guineensis]
c115696_g1	410.31	163.23	183.84	28.53	37.34	36.53	81.39	46.39	43.28	gi|802571112|ref|XP_012068276.1| PREDICTED: F-box protein GID2 [Jatropha curcas] gi|643735002|gb|KDP41672.1| hypothetical protein JCGZ_16079 [Jatropha curcas]
c146915_g2	409.51	359.9	387.51	111.71	104.65	99.71	112.44	123.9	122.44	gi|1168654|sp|P45582.1|BGAL_ASPOF RecName: Full=Beta-galactosidase; Short=Lactase; Flags: Precursor gi|452712|emb|CAA54525.1| beta-galactosidase [Asparagus officinalis]
c98686_g2	406.28	320	323.38	99.94	70.65	87.07	338.88	171.49	165.95	gi|743840238|ref|XP_010937212.1| PREDICTED: uncharacterized protein At5g39570-like [Elaeis guineensis]
c137529_g3	405.27	400.03	397.94	375.46	212.49	199.06	593.57	425.52	434.79	gi|901807768|gb|KMZ64735.1| hypothetical protein ZOSMA_34G00110 [Zostera marina]
c131968_g2	404.99	384.99	383.21	64.77	54.77	53.86	187.96	155.27	172.96	gi|743763118|ref|XP_010911323.1| PREDICTED: cytochrome P450 71A1-like [Elaeis guineensis]
c149624_g1	404.65	392.65	386.36	7.34	7.34	7.47	106.49	90.49	85.49	gi|672199448|ref|XP_008777614.1| PREDICTED: linoleate 9S-lipoxygenase 6-like [Phoenix dactylifera]
c143932_g1	404.52	358.02	382.95	6.31	4.29	4.02	112.1	116.4	118.34	gi|147898200|dbj|BAF62630.1| malate synthase [Iris x hollandica]
c139569_g1	403.95	326.37	329.88	248.32	171.11	178.03	509.45	434.31	440.9	gi|743818528|ref|XP_010931250.1| PREDICTED: 60S ribosomal protein L36-3-like [Elaeis guineensis] gi|743818531|ref|XP_010931251.1| PREDICTED: 60S ribosomal protein L36-3-like [Elaeis guineensis]
c140567_g1	403.95	364.79	369.95	0.72	0.81	1.84	0.32	0.45	0.64	gi|743777712|ref|XP_010919295.1| PREDICTED: LOW QUALITY PROTEIN: aluminum-activated malate transporter 10-like [Elaeis guineensis]
c149323_g2	403.17	347.67	357.6	3170.48	2944.5	2914.69	545.69	517.22	494.51	gi|802732576|ref|XP_012086426.1| PREDICTED: glutamine synthetase cytosolic isozyme [Jatropha curcas] gi|643712534|gb|KDP25795.1| hypothetical protein JCGZ_22517 [Jatropha curcas]
c140648_g2	402.54	352.91	349.97	14.75	14.96	17.38	346.8	202.46	204.04	-
c130723_g1	401.43	381.43	388.59	172.86	162.86	166.17	677.51	681.46	662.51	gi|725827541|gb|AIY34672.1| annexin D2-like protein [Ornithogalum longebracteatum]
c141506_g2	400.79	392.79	389.31	182.61	167.61	167.89	295.25	307.25	300.65	gi|1035957700|gb|OAY79063.1| Nucleosome assembly protein 1 2 [Ananas comosus]
c148196_g1	400.03	315.14	354.54	200.49	123.38	129.78	300.17	279.91	278.39	gi|731910541|gb|AIZ68143.1| PHD finger protein ALFIN-LIKE 3-like isoform X3 [Ornithogalum saundersiae]
c137628_g2	399.83	388.34	400.84	10.89	6.47	7.63	13.37	9.26	8.65	gi|1033211140|gb|ANH58208.1| glutathione S-transferase [Dracaena cambodiana]
c143252_g2	399.48	283.93	312.04	106.21	154.32	165	44.02	37.31	35.77	-
c130348_g2	398.43	386.43	455.52	27.55	22.55	20.81	233.83	217.83	206.98	gi|1035896614|gb|OAY26216.1| hypothetical protein MANES_16G030000 [Manihot esculenta]
c110777_g2	398.06	297.82	315.02	317.72	253.24	220.71	640.2	520.56	437.78	gi|557159545|gb|AGZ90161.1| ubiquitin, partial [Litsea cubeba]
c141199_g4	397.04	336.06	344.88	150.62	108.45	108.67	235.77	190.76	182.87	gi|743759544|ref|XP_010932739.1| PREDICTED: thioredoxin H1 [Elaeis guineensis]
c135752_g1	394.8	424.28	462.74	102.17	107.64	102.23	311.23	269.17	284.04	-
c148914_g1	393.91	345.7	388.69	124.53	129.35	117.12	93.1	76.69	88.96	gi|672114925|ref|XP_008779141.1| PREDICTED: phosphatidylinositol 4-phosphate 5-kinase 9-like isoform X1 [Phoenix dactylifera] gi|672114927|ref|XP_008779148.1| PREDICTED: phosphatidylinositol 4-phosphate 5-kinase 9-like isoform X1 [Phoenix dactylifera]
c147296_g2	393.84	314.76	338.33	64.8	57.97	53.47	69.61	68.64	67.69	gi|695036848|ref|XP_009405896.1| PREDICTED: probable strigolactone esterase DAD2 [Musa acuminata subsp. malaccensis]
c149688_g1	393.26	385.26	416.5	306.99	291.99	277.56	411.02	423.02	390.98	gi|401665808|gb|AFP95893.1| F3&apos;H [Narcissus tazetta]
c148715_g4	393.03	339.2	368.03	216.32	165.24	181.32	496.37	471.37	438.74	gi|373839527|gb|AEY76159.1| actin, partial [Dioscorea zingiberensis]
c130263_g3	392.52	220.97	231.88	74.47	66.65	64	287.76	195.53	199.06	gi|672154141|ref|XP_008797632.1| PREDICTED: uncharacterized protein LOC103712786 [Phoenix dactylifera]
c147888_g1	388.18	291.37	336.86	347.16	212.66	234.68	653.59	552.77	574.76	gi|743794305|ref|XP_010924141.1| PREDICTED: guanine nucleotide-binding protein subunit beta-like protein A [Elaeis guineensis]
c143804_g1	388.18	221.99	224.78	112.11	117.3	120.11	223.56	188.56	191.95	gi|944262682|gb|KQL26939.1| hypothetical protein SETIT_029406mg [Setaria italica]
c129823_g1	387.46	349.13	365.46	125.29	141.26	113.29	288.99	324.04	298.99	gi|310751740|gb|ADP09339.1| actin [Jatropha curcas]
c133827_g2	385.63	338.14	334.03	45.96	57.03	53.96	173.15	138.15	140.32	gi|695023163|ref|XP_009398735.1| PREDICTED: sorbitol dehydrogenase-like [Musa acuminata subsp. malaccensis]
c140077_g3	385.28	342.24	367.28	260.15	255.15	265.8	526.47	549.75	508.47	gi|574584672|ref|NP_001276141.1| 60S ribosomal protein L7-4-like [Glycine max] gi|255637395|gb|ACU19026.1| unknown [Glycine max]
c148661_g3	383.28	308.24	330.79	196.41	157.91	160.13	93.1	86.16	87.35	gi|725827525|gb|AIY34664.1| 4-coumarate:CoA ligase-like protein [Ornithogalum longebracteatum]
c132162_g1	383.01	358.7	365.01	166.94	161.94	160.6	517.87	474.33	499.87	gi|731910205|gb|AIZ68132.1| translation elongation factor 1-delta 1 [Ornithogalum longebracteatum]
c146822_g1	381.62	369.62	349.08	248.64	271.99	240.64	160.6	151.6	153.82	-
c139807_g2	381.49	311.8	346.79	183.93	112.55	102.17	314.81	211.43	213.35	-
c140795_g5	380.37	226.6	226.4	256.27	103.14	112.42	363.38	205.24	199.11	gi|590694753|ref|XP_007044696.1| RNA polymerases N / 8 kDa subunit [Theobroma cacao] gi|508708631|gb|EOY00528.1| RNA polymerases N / 8 kDa subunit [Theobroma cacao]
c122798_g1	379.74	306.98	329.43	0.22	0	0.13	1.5	1.7	1.06	gi|566150660|ref|XP_006369490.1| hypothetical protein POPTR_0001s23920g [Populus trichocarpa] gi|550348039|gb|ERP66059.1| hypothetical protein POPTR_0001s23920g [Populus trichocarpa]
c147075_g2	378.36	372.94	373.14	315.22	322.87	307.81	423.37	392.68	419.23	gi|743809830|ref|XP_010928724.1| PREDICTED: V-type proton ATPase catalytic subunit A [Elaeis guineensis]
c149251_g1	377.45	362.45	377.07	63.29	54.7	58.29	1.46	1.04	1.24	gi|743817359|ref|XP_010930912.1| PREDICTED: cellulose synthase-like protein H1 isoform X1 [Elaeis guineensis]
c135815_g1	376.61	399.94	415	304.74	233.12	212.11	308.15	269.23	275.72	gi|695015391|ref|XP_009394563.1| PREDICTED: uncharacterized protein LOC103980004 [Musa acuminata subsp. malaccensis]
c136443_g3	376.37	340.34	342.37	132.11	123.11	123.97	105.06	113.7	119.06	gi|151347473|gb|ABS01349.1| hypersensitive-induced response protein [Carica papaya]
c143971_g1	376.14	368.14	379.01	21.37	6.37	4.72	0.64	0.94	0.35	gi|1035949818|gb|OAY73203.1| Aquaporin TIP2-2 [Ananas comosus]
c137900_g2	376.01	364.01	367.08	137	127.29	129	381.45	372.45	353.24	gi|700209968|gb|KGN65064.1| hypothetical protein Csa_1G188170 [Cucumis sativus]
c143362_g1	374.64	353.05	356.64	205.58	200.58	203.07	507	493.9	489	gi|1035963236|gb|OAY83765.1| Elongation factor 1-gamma 2 [Ananas comosus]
c137662_g2	373.85	302.32	337.85	192.52	109.29	108.03	380.01	289.68	305.22	-
c114061_g1	372.97	315.46	338.97	49.81	40.81	40.95	185.71	175.16	199.71	gi|672181421|ref|XP_008810927.1| PREDICTED: cytochrome P450 71A1-like [Phoenix dactylifera]
c135654_g4	370.67	275.99	291.78	145.08	104.32	128.96	231.84	194.66	206.48	-
c145672_g6	370.38	314.72	318.17	228.91	215.75	214.66	419.23	400.33	406.49	gi|944086578|gb|KQK21930.1| hypothetical protein BRADI_1g64020 [Brachypodium distachyon]
c128136_g2	370.23	367.47	373.22	228.3	198.54	206.35	429.66	361.08	367.54	gi|567886888|ref|XP_006435966.1| hypothetical protein CICLE_v10033444mg, partial [Citrus clementina] gi|557538162|gb|ESR49206.1| hypothetical protein CICLE_v10033444mg, partial [Citrus clementina]
c146882_g3	368.55	343.83	343.55	202.44	184.21	167.44	229.12	204.12	199.62	gi|743853412|ref|XP_010940650.1| PREDICTED: 3-ketoacyl-CoA thiolase 2, peroxisomal-like [Elaeis guineensis]
c143594_g1	367.97	326.03	322.3	205.37	155.87	150.85	359.77	360.68	377.63	gi|743791111|ref|XP_010923339.1| PREDICTED: uncharacterized protein LOC105046447 [Elaeis guineensis]
c145306_g3	367.79	227.48	220.45	143.43	95.74	89.08	248.98	139.69	149.78	gi|44889626|gb|AAS48416.1| cinammate 4-hydroxylase [Allium cepa]
c137951_g2	367.48	361.67	361.34	97.12	127.85	127.03	218.77	218.09	213.21	gi|672128918|ref|XP_008787955.1| PREDICTED: formate dehydrogenase, mitochondrial [Phoenix dactylifera]
c138844_g2	366.14	270.83	284.93	45	33.93	32.91	63.61	58.41	57	gi|672141870|ref|XP_008794779.1| PREDICTED: probable polygalacturonase isoform X3 [Phoenix dactylifera]
c139565_g1	366.09	342.15	427.6	328.08	309.56	280.65	483.01	472.38	363.5	gi|414586969|tpg|DAA37540.1| TPA: hypothetical protein ZEAMMB73_119928 [Zea mays]
c136628_g1	365.5	289.66	291.23	204.27	112.66	113.59	314.55	234.58	231.36	gi|522192073|gb|AGQ04593.1| lipid droplet-associated protein 1 [Persea americana]
c6502_g1	364.09	271.17	203.6	83.46	65.73	70.67	199.99	118.55	90.98	-
c141463_g4	363.5	248.36	264.01	122.35	141.22	143.7	820.27	808.87	794.42	gi|828320853|ref|XP_012572749.1| PREDICTED: probable histone H2B.1 [Cicer arietinum] gi|828320856|ref|XP_012572750.1| PREDICTED: probable histone H2B.1 [Cicer arietinum]
c137765_g1	363.22	275.66	273.83	267.08	135.41	135.08	679.14	507.9	544.88	gi|703063147|ref|XP_010086894.1| 40S ribosomal protein S30 [Morus notabilis] gi|587833880|gb|EXB24685.1| 40S ribosomal protein S30 [Morus notabilis]
c138607_g2	362.4	259.5	259.75	123.83	102.57	106.6	217.62	176.36	178.21	gi|1035908241|gb|OAY37838.1| hypothetical protein MANES_11G133200 [Manihot esculenta]
c133714_g4	361.82	271.07	290.96	72.6	68.89	81.89	104.91	92.08	78.48	-
c109603_g1	361.64	222.97	241.68	83.48	68.36	95.78	114.32	93.78	102.47	gi|672112587|ref|XP_008806725.1| PREDICTED: IAA-amino acid hydrolase ILR1-like 1 [Phoenix dactylifera] gi|672200608|ref|XP_008777919.1| PREDICTED: IAA-amino acid hydrolase ILR1-like 1 [Phoenix dactylifera]
c150249_g2	361.37	346.37	351.79	84.36	86.04	79.36	197.83	203.16	189.83	gi|1009135836|ref|XP_015885202.1| PREDICTED: aspartate aminotransferase, cytoplasmic [Ziziphus jujuba]
c133266_g5	359.84	325.38	341.84	69.96	64.96	59.06	129.5	139.41	111.5	gi|720005804|ref|XP_010257772.1| PREDICTED: la-related protein 6A isoform X3 [Nelumbo nucifera]
c133497_g2	358.73	350.73	346.7	140.11	125.11	122.67	194.8	206.8	208.63	gi|743788179|ref|XP_010922601.1| PREDICTED: ubiquitin-activating enzyme E1 1-like isoform X1 [Elaeis guineensis]
c135055_g2	358.22	329.33	325.94	96.19	103.67	100.19	404.41	447.34	440.97	gi|703145253|ref|XP_010108484.1| 40S ribosomal protein S26-1 [Morus notabilis] gi|587932498|gb|EXC19546.1| 40S ribosomal protein S26-1 [Morus notabilis]
c148070_g3	357.79	345.79	354.51	106.5	101.5	99.61	268.92	252.92	260.41	gi|743815289|ref|XP_010930297.1| PREDICTED: FRIGIDA-like protein 3 [Elaeis guineensis]
c144541_g1	357.35	345.35	356.62	181.76	176.76	180.67	288.94	272.94	271.76	gi|694997689|ref|XP_009400693.1| PREDICTED: pre-mRNA-splicing factor syf2 [Musa acuminata subsp. malaccensis]
c150160_g3	357.03	276.64	309.48	218.61	197.71	202.39	115.6	97.46	94.52	gi|3559803|emb|CAA06839.1| invertase [Allium cepa]
c150748_g1	357.02	317.47	324.31	14.35	15.52	15.77	22.35	24.16	27.84	gi|743837850|ref|XP_010936527.1| PREDICTED: isoflavone 2&apos;-hydroxylase-like isoform X1 [Elaeis guineensis]
c148540_g1	356.47	383.05	393.43	1022.19	963.3	948.91	662.01	599.76	580.94	gi|255570990|ref|XP_002526446.1| PREDICTED: stromal 70 kDa heat shock-related protein, chloroplastic [Ricinus communis] gi|223534226|gb|EEF35941.1| heat shock protein, putative [Ricinus communis]
c143406_g4	355.95	298.56	321.95	170	161	160.22	222.98	255.33	236.98	gi|1035963924|gb|OAY84365.1| 14-3-3-like protein D [Ananas comosus]
c136347_g1	355.56	321.71	333.56	14.36	1.94	2.36	6.94	8.38	9.21	gi|568878660|ref|XP_006492304.1| PREDICTED: non-functional NADPH-dependent codeinone reductase 2 [Citrus sinensis] gi|641810543|gb|KDO36963.1| hypothetical protein CISIN_1g020679mg [Citrus sinensis]
c139773_g1	353.06	204.39	215.53	300.26	168.13	179.82	225.59	142.29	145.84	gi|720099168|ref|XP_010247858.1| PREDICTED: probable protein phosphatase 2C 75 isoform X2 [Nelumbo nucifera]
c145270_g1	353	251.02	279.68	360.18	222.44	223.2	350.32	247.48	231.53	gi|302425183|sp|P85200.1|PRS6B_HELAN RecName: Full=26S protease regulatory subunit 6B homolog [Helianthus annuus]
c126528_g2	350.92	279.35	295.64	123.91	152.75	144.13	191.26	183.75	176.72	gi|743873079|ref|XP_010906723.1| PREDICTED: charged multivesicular body protein 1-like [Elaeis guineensis]
c142544_g1	349.88	344.88	346.26	210.29	202.29	198.03	452.14	441.15	445.14	gi|1035961404|gb|OAY82166.1| Elongation factor 2 [Ananas comosus]
c149002_g3	349.74	313.42	324.74	204.43	172.63	169.43	188.41	163.41	156.41	gi|473993048|gb|EMS51931.1| UTP--glucose-1-phosphate uridylyltransferase [Triticum urartu]
c141666_g1	349.47	313.43	298.74	445.84	422.5	445.93	211.95	266.24	279.68	gi|743810529|ref|XP_010928922.1| PREDICTED: uncharacterized protein LOC105050548 [Elaeis guineensis]
c136433_g1	349.03	164.15	168.73	103.24	106.9	111.24	202.2	167.2	157.27	gi|743811529|ref|XP_010929184.1| PREDICTED: probable steroid-binding protein 3 [Elaeis guineensis]
c141032_g1	348.92	328.38	323.92	323.01	290.14	288.01	542.07	517.07	532.77	gi|657943143|ref|XP_008356006.1| PREDICTED: uncharacterized protein LOC103419652 [Malus domestica]
c137335_g1	348	340	348.14	191.14	176.14	180.73	345.67	357.67	352.56	gi|1035943991|gb|OAY69144.1| ATP-citrate synthase alpha chain protein 3 [Ananas comosus]
c144156_g5	346.48	281.41	273.06	231.3	127.75	126.65	518.62	428.71	423.78	gi|672143755|ref|XP_008795758.1| PREDICTED: 60S ribosomal protein L31, partial [Phoenix dactylifera]
c130683_g1	344.18	231.94	237.96	216.15	133.57	106.11	508.49	399.46	404.07	gi|944083944|gb|KQK19296.1| hypothetical protein BRADI_1g47501 [Brachypodium distachyon]
c149277_g1	344.03	336.03	329.07	64.9	49.9	53.31	170.8	182.8	203.92	gi|743759938|ref|XP_010934528.1| PREDICTED: probable acyl-activating enzyme 18, peroxisomal [Elaeis guineensis]
c150610_g1	343.77	224.94	226.21	380.95	281.92	282.73	331.63	262.97	275.66	-
c134045_g5	343.2	326.1	351.39	224.13	212.55	223.36	686.8	649.15	616.28	gi|1035941660|gb|OAY67668.1| 40S ribosomal protein S24-2 [Ananas comosus]
c129843_g1	341.35	302.99	302.08	493.13	456.71	455.89	228.26	171.74	172.77	gi|1035935649|gb|OAY64314.1| Oryzain gamma chain [Ananas comosus]
c148819_g1	339.97	302.13	305.97	353.61	344.61	338.09	518.01	527.15	532.01	gi|672135671|ref|XP_008791507.1| PREDICTED: phosphoenolpyruvate carboxykinase [ATP]-like [Phoenix dactylifera] gi|672135673|ref|XP_008791508.1| PREDICTED: phosphoenolpyruvate carboxykinase [ATP]-like [Phoenix dactylifera]
c139136_g2	339.75	316.7	308.02	236.6	224.18	246.32	570.72	490.76	525.74	gi|47027030|gb|AAT08730.1| ribosomal protein L34 [Hyacinthus orientalis]
c141304_g1	339.02	285.56	314.02	185.29	157.58	150.29	334.37	309.37	297.28	gi|672117337|ref|XP_008781851.1| PREDICTED: 60S ribosomal protein L7-2-like [Phoenix dactylifera]
c142351_g6	334.64	265.55	284.58	170.23	122.67	106.93	220.85	139.85	136.07	-
c128260_g2	332.88	306.66	307.88	116.86	77.87	81.86	85.24	60.24	65.99	gi|731329055|ref|XP_010675388.1| PREDICTED: phosphoenolpyruvate carboxylase 2 [Beta vulgaris subsp. vulgaris] gi|870861923|gb|KMT13176.1| hypothetical protein BVRB_4g085820 [Beta vulgaris subsp. vulgaris]
c131670_g1	332.78	238.43	254	59.95	47.3	51.51	235.13	104.72	111.36	gi|695035926|ref|XP_009405398.1| PREDICTED: cysteine-rich and transmembrane domain-containing protein A-like isoform X1 [Musa acuminata subsp. malaccensis]
c142519_g3	331.73	251.29	269.25	231.63	132.11	141.68	681.61	500.02	444.97	gi|674931242|emb|CDY02235.1| BnaA03g39320D [Brassica napus]
c138895_g2	331.49	322.97	339.88	345.13	332.82	323.35	247.75	247.83	239.18	-
c132402_g3	330.21	289.29	301.01	185.3	159.41	161.61	423.44	357.32	396.41	gi|947062718|gb|KRH11979.1| hypothetical protein GLYMA_15G143200 [Glycine max]
c135726_g2	329.01	292.63	314.36	376.12	213.67	210.68	625.69	532.15	495.77	gi|669031896|emb|CDM87113.1| unnamed protein product [Triticum aestivum]
c129823_g4	328.81	273.19	261.78	415.57	225.57	230.8	388.88	333.87	346.82	gi|162708014|gb|ABY19575.1| actin [Ipomoea batatas]
c142144_g2	328.4	167.93	173.24	196.89	196.19	204.89	185.49	150.49	154.62	gi|1035937984|gb|OAY65537.1| putative quinone-oxidoreductase, chloroplastic [Ananas comosus]
c97928_g1	327.03	307.03	319.57	422.52	412.52	433.92	409.45	381.47	394.45	-
c141340_g3	326.97	291.13	278.19	198.73	175.46	180.75	332.79	355.93	319.5	gi|743861837|ref|XP_010943386.1| PREDICTED: uncharacterized protein LOC105061124 [Elaeis guineensis]
c139589_g2	326.73	306.73	300.21	50.94	40.94	32.63	45.06	25.62	30.06	-
c47477_g1	325.94	286.02	304.92	146.06	152.07	154.06	213.74	178.74	176.63	gi|720085135|ref|XP_010243427.1| PREDICTED: uncharacterized protein LOC104587494 isoform X2 [Nelumbo nucifera]
c119919_g1	325.86	249.36	258.32	194.28	164.49	163.58	182.04	176.73	188.21	gi|672110239|ref|XP_008794264.1| PREDICTED: glycine-rich RNA-binding protein 3, mitochondrial-like [Phoenix dactylifera]
c134973_g1	323.74	282.37	289.02	371.13	311.96	303.16	480.99	456.28	460.92	gi|255539248|ref|XP_002510689.1| PREDICTED: high mobility group B protein 3 [Ricinus communis] gi|223551390|gb|EEF52876.1| DNA-binding protein MNB1B, putative [Ricinus communis]
c133651_g6	322.32	264.09	286.36	482.39	248.7	223.44	218.27	104.09	103.6	gi|823075336|gb|AKI23600.1| NAC transcription factor [Prunus humilis]
c138192_g2	320.31	294.31	296.17	64.83	34.85	33.39	179.45	74.37	82.27	gi|672115864|ref|XP_008781084.1| PREDICTED: universal stress protein A-like protein isoform X1 [Phoenix dactylifera]
c135900_g6	319.92	271.51	279.75	106.6	126.26	114.6	100.67	65.67	72.43	gi|672125678|ref|XP_008786261.1| PREDICTED: putative lipase YOR059C isoform X1 [Phoenix dactylifera]
c141693_g3	319.25	299.25	320.23	155.11	145.11	134.54	263.75	248.06	248.75	gi|695043758|ref|XP_009409586.1| PREDICTED: proteasome subunit beta type-6-like [Musa acuminata subsp. malaccensis]
c136762_g1	318.63	277.95	289.96	168.28	142.83	145.7	555.08	516.89	514.18	gi|743791713|ref|XP_010923506.1| PREDICTED: 60S ribosomal protein L4 [Elaeis guineensis]
c119507_g1	318.55	234.58	267.19	83.85	70.04	71.36	22.09	16.24	17.66	gi|695067369|ref|XP_009380599.1| PREDICTED: transcription factor bHLH147-like [Musa acuminata subsp. malaccensis]
c133835_g3	317.71	148.18	162.45	2.4	3.7	2.21	73.93	38.93	40.31	gi|225426923|ref|XP_002264799.1| PREDICTED: 21 kDa protein-like [Vitis vinifera]
c143201_g2	317.53	261.67	264.29	601.09	520.48	557.98	557.87	454.61	537.21	-
c132830_g5	317.24	100.02	96.53	163.08	127.75	171.08	727.27	692.27	698.88	gi|6708225|gb|AAF25842.1|AF196485_1 beta-tubulin, partial [Vitis vinifera]
c127241_g2	316.34	247.76	276.29	166.6	156.08	147.66	440.87	418.01	387.66	gi|697106900|ref|XP_009607276.1| PREDICTED: clathrin light chain 1-like, partial [Nicotiana tomentosiformis]
c147654_g2	315.96	310.96	310.34	261.11	253.11	249.72	334.43	320.75	327.43	gi|922408766|ref|XP_013470345.1| archaeal/vacuolar-type H+-ATPase subunit B [Medicago truncatula] gi|657405942|gb|KEH44383.1| archaeal/vacuolar-type H+-ATPase subunit B [Medicago truncatula]
c144301_g1	310.53	302.53	305.83	768.09	753.09	724.53	136	148	143.74	gi|157863010|gb|ABV90637.1| sucrose-phosphate synthase [Allium cepa]
c74197_g1	309.74	205.98	207	204.37	154.2	138.07	205.98	196.5	187.48	gi|703153934|ref|XP_010110808.1| Polyadenylate-binding protein 2 [Morus notabilis] gi|587941612|gb|EXC28180.1| Polyadenylate-binding protein 2 [Morus notabilis]
c132639_g1	309.54	291.73	291.54	151.19	146.19	156.37	266.6	235.93	248.6	gi|302393764|sp|P0C073.2|RUB1_DESAN RecName: Full=Ubiquitin-NEDD8-like protein RUB1; Contains: RecName: Full=Ubiquitin; Contains: RecName: Full=NEDD8-like protein RUB1; AltName: Full=DaRUB1; AltName: Full=Ubiquitin-related protein 1; Flags: Precursor gi|20562909|gb|AAM22748.1| polyubiquitin 2 [Deschampsia antarctica]
c129178_g1	309.3	304.3	326.81	291.89	283.89	273.23	359.66	350.98	352.66	gi|1035944257|gb|OAY69310.1| ATP synthase subunit d, mitochondrial [Ananas comosus]
c150458_g3	309.18	289.18	276.36	194.08	184.08	146.88	222	178.69	207	gi|672124271|ref|XP_008785511.1| PREDICTED: uracil phosphoribosyltransferase-like [Phoenix dactylifera]
c143384_g1	309.12	395.82	421.33	79.06	49.96	44.85	105.84	102.26	101.84	gi|695057955|ref|XP_009417274.1| PREDICTED: uncharacterized protein LOC103997695 [Musa acuminata subsp. malaccensis]
c146830_g1	309.02	299.04	303.8	122.5	118.83	115.09	309.97	293.05	305.83	gi|1035954454|gb|OAY76467.1| Fanconi-associated nuclease, partial [Ananas comosus]
c148445_g2	308.21	245.66	278.52	205.91	127.73	178.33	221.89	201.91	239.5	gi|743758048|ref|XP_010924799.1| PREDICTED: cyclin-B1-2-like [Elaeis guineensis]
c139388_g2	308.07	276.87	290.07	67.61	62.61	59.65	124.01	101.71	106.01	gi|1002254710|ref|XP_015631622.1| PREDICTED: actin-depolymerizing factor 5 [Oryza sativa Japonica Group] gi|122247304|sp|Q10P87.1|ADF5_ORYSJ RecName: Full=Actin-depolymerizing factor 5; Short=ADF-5; Short=OsADF5 gi|108707118|gb|ABF94913.1| Actin-depolymerizing factor, putative, expressed [Oryza sativa Japonica Group] gi|113547996|dbj|BAF11439.1| Os03g0243100 [Oryza sativa Japonica Group] gi|21567…
c136609_g1	307.94	302.94	313.14	195.43	187.43	171.75	258.59	243.7	251.59	gi|695006980|ref|XP_009390018.1| PREDICTED: monodehydroascorbate reductase-like [Musa acuminata subsp. malaccensis]
c146093_g1	304.69	296.69	282.08	68.11	53.11	63.51	200.91	212.91	205.74	gi|743774797|ref|XP_010917764.1| PREDICTED: uncharacterized protein LOC105042310 [Elaeis guineensis] gi|743774799|ref|XP_010917765.1| PREDICTED: uncharacterized protein LOC105042310 [Elaeis guineensis]
c142440_g3	302.78	283.25	301.55	114.62	130.38	129.66	204.07	161.44	146.44	gi|731911550|gb|AIZ68209.1| serine/threonine-protein kinase SAPK7-like protein [Ornithogalum longebracteatum]
c137638_g1	302.7	289.25	273.05	83.55	75.36	67.55	43.74	36.54	31.5	gi|672162179|ref|XP_008800923.1| PREDICTED: MATE efflux family protein 5-like [Phoenix dactylifera]
c146837_g1	302.2	269.24	284.2	99.63	94.63	100.96	151.85	131.89	133.85	gi|672182527|ref|XP_008811514.1| PREDICTED: serine/threonine-protein phosphatase PP1 [Phoenix dactylifera] gi|672182529|ref|XP_008811515.1| PREDICTED: serine/threonine-protein phosphatase PP1 [Phoenix dactylifera] gi|672182531|ref|XP_008811516.1| PREDICTED: serine/threonine-protein phosphatase PP1 [Phoenix dactylifera]
c103607_g1	301.63	357	358.79	237.62	256.91	243.07	1263.68	1125.53	1209.47	gi|52001189|gb|AAU21475.1| alpha-tubulin, partial [Camellia sinensis]
c150593_g3	300.26	244.53	237.95	92.38	74.23	82.77	248.52	129.91	131.05	gi|242066200|ref|XP_002454389.1| hypothetical protein SORBIDRAFT_04g029930 [Sorghum bicolor] gi|241934220|gb|EES07365.1| hypothetical protein SORBI_004G261100 [Sorghum bicolor]
c128250_g1	298.71	278.71	305.81	147.44	137.44	130.25	468.35	466.98	453.35	gi|672168010|ref|XP_008803986.1| PREDICTED: 40S ribosomal protein S20-1 [Phoenix dactylifera]
c119087_g1	298.24	250.46	252.03	127.9	121.52	119	904.51	844.93	800.49	gi|118483777|gb|ABK93781.1| unknown [Populus trichocarpa]
c139920_g3	297.69	269.48	272.69	205.99	168.58	170.99	158.73	133.73	128.16	gi|298204856|emb|CBI34163.3| unnamed protein product [Vitis vinifera]
c135199_g2	296.12	288.12	273.07	370.42	355.42	359.17	290.7	302.7	319.55	gi|743787029|ref|XP_010922321.1| PREDICTED: triosephosphate isomerase, cytosolic isoform X2 [Elaeis guineensis]
c146049_g1	295.53	269.62	277.53	97.61	92.61	89.99	95.16	91.47	77.16	gi|743822462|ref|XP_010932283.1| PREDICTED: uncharacterized protein LOC105052991 [Elaeis guineensis]
c124169_g1	295.47	289.2	270.47	182.05	158.55	147.05	236.91	211.91	203.9	gi|672161743|ref|XP_008800700.1| PREDICTED: aspartic proteinase oryzasin-1-like isoform X2 [Phoenix dactylifera]
c136840_g5	295.17	158.68	147.68	80.32	69.94	88.32	107.74	72.74	80.05	-
c134967_g1	295	275	279.57	114.58	104.58	101.56	203.33	196.24	188.33	gi|672165334|ref|XP_008802567.1| PREDICTED: cystathionine gamma-synthase, chloroplastic-like isoform X2 [Phoenix dactylifera]
c141610_g4	294.95	270.25	287.09	235.65	173.43	175.96	603.11	437.53	443.96	gi|658045831|ref|XP_008358599.1| PREDICTED: 60S ribosomal protein L8-3, partial [Malus domestica]
c139936_g1	294.75	330.11	313.4	309.32	328.37	317.32	368.61	333.61	330.78	gi|33325123|gb|AAQ08194.1| eukaryotic translation initiation factor 5A isoform IV [Hevea brasiliensis]
c129454_g1	294.26	286.26	304.35	129.41	114.41	110.13	193.17	205.17	196.69	-
c147220_g3	293.51	260.77	207.5	193.1	184.92	132.36	269.61	241.88	213.86	-
c59390_g1	293.43	288.43	280.16	8.46	0.46	0.29	7.49	0.25	0.49	gi|695007570|ref|XP_009390336.1| PREDICTED: peroxidase 59-like [Musa acuminata subsp. malaccensis]
c145954_g3	292.32	290.14	270.32	163.22	152.79	151.22	267.02	278.91	277.02	gi|743862996|ref|XP_010943685.1| PREDICTED: ETHYLENE INSENSITIVE 3-like 1 protein [Elaeis guineensis]
c146947_g4	292.14	272.14	289.12	348.37	338.37	327.38	354.11	326.77	339.11	gi|922389330|ref|XP_013463114.1| cAMP-regulated phosphoprotein-like protein [Medicago truncatula] gi|657397436|gb|KEH37161.1| cAMP-regulated phosphoprotein-like protein [Medicago truncatula]
c87267_g1	291.83	286.83	252.43	98.61	90.61	86.82	258.44	303.57	251.44	gi|1035943410|gb|OAY68774.1| hypothetical protein ACMD2_09739 [Ananas comosus]
c144729_g1	289.74	1674.52	1662.48	31.52	45.19	39.52	271.03	236.03	225.64	-
c150531_g3	289.54	269.54	308.22	24.03	14.03	11.23	80.42	69.65	65.42	gi|743790504|ref|XP_010923184.1| PREDICTED: 7-deoxyloganetic acid glucosyltransferase-like [Elaeis guineensis]
c144827_g2	288.6	222.08	237.97	141.51	128.53	130.42	129.81	121.57	123.79	gi|414589592|tpg|DAA40163.1| TPA: hypothetical protein ZEAMMB73_081901 [Zea mays]
c118136_g1	288.46	155.65	168.88	121.69	105.4	129.69	130.26	95.26	82.76	gi|672124401|ref|XP_008785579.1| PREDICTED: protein IWS1 homolog [Phoenix dactylifera]
c135390_g1	287.1	272.1	286.23	145.6	140.22	140.6	35.11	27.71	27.11	gi|255573248|ref|XP_002527553.1| PREDICTED: purple acid phosphatase 3 [Ricinus communis] gi|223533103|gb|EEF34862.1| Tartrate-resistant acid phosphatase type 5 precursor, putative [Ricinus communis]
c140327_g2	286.68	274.68	282.93	22.82	17.82	18.26	20.28	16.85	17.22	gi|743761765|ref|XP_010904652.1| PREDICTED: uncharacterized protein LOC105032024 [Elaeis guineensis]
c136184_g1	286.61	274.61	275.76	168.24	163.24	161.78	221.38	205.38	206.03	gi|743841040|ref|XP_010937429.1| PREDICTED: 5&apos;-adenylylsulfate reductase-like 3 [Elaeis guineensis]
c135886_g1	286.15	266.15	311.07	146.49	136.49	128.91	252.37	223.72	237.37	gi|217072902|gb|ACJ84811.1| unknown [Medicago truncatula]
c143140_g1	285.93	277.41	295.6	166.24	153.93	157.16	321.92	352.63	313.35	gi|695075179|ref|XP_009384820.1| PREDICTED: serine/arginine-rich splicing factor RS2Z32 isoform X2 [Musa acuminata subsp. malaccensis]
c144759_g1	285.66	260	263.66	205.25	189.57	193.25	107.45	121.33	117.45	gi|672116575|ref|XP_008781455.1| PREDICTED: cationic peroxidase SPC4-like [Phoenix dactylifera]
c117632_g1	284.9	269.9	254	11.39	6.56	6.39	32.55	24.56	24.55	gi|694996380|ref|XP_009393714.1| PREDICTED: B-box zinc finger protein 20-like [Musa acuminata subsp. malaccensis]
c126253_g1	284.29	221.59	216.64	158.26	148.35	168.6	302.49	259.34	263.84	gi|944252342|gb|KQL16605.1| hypothetical protein SETIT_024179mg, partial [Setaria italica]
c139461_g1	284.25	236.07	274.15	380.43	405.72	375.25	362.6	345.88	348.21	gi|971460060|emb|CUT18432.1| H1.6, partial [Lilium davidii var. unicolor]
c133209_g3	283.55	263.55	266.58	38.19	28.19	18.81	33.41	20.82	18.41	gi|672195777|ref|XP_008776632.1| PREDICTED: alcohol dehydrogenase-like 3, partial [Phoenix dactylifera]
c138606_g1	283.1	271.1	295.22	303.68	289.05	295.68	332.25	323.25	337.68	-
c147976_g2	282.22	274.22	271.39	104.86	89.86	83.41	194.35	206.35	204.21	gi|743830884|ref|XP_010934535.1| PREDICTED: protein RCC2 homolog isoform X1 [Elaeis guineensis]
c141126_g1	282.02	262.02	269.11	242.48	232.48	244.86	348.84	324.71	333.84	gi|695014513|ref|XP_009394087.1| PREDICTED: cysteine proteinase inhibitor-like [Musa acuminata subsp. malaccensis]
c88982_g1	281.97	269.97	268.8	336.63	331.63	329.64	398.01	382.01	388.56	gi|743770718|ref|XP_010915650.1| PREDICTED: uncharacterized protein LOC105040694 isoform X1 [Elaeis guineensis]
c141455_g1	281.75	265.13	263.75	125.36	120.36	119.28	219.81	207.25	201.81	gi|695060508|ref|XP_009418646.1| PREDICTED: pyruvate kinase, cytosolic isozyme [Musa acuminata subsp. malaccensis]
c143054_g2	281.65	233.17	242.71	138.21	166.38	166.43	1573.35	1366.84	1380.49	-
c137917_g6	281.54	252.62	256.54	35.91	1	0.91	12.04	10.09	10.48	gi|695005944|ref|XP_009389441.1| PREDICTED: non-symbiotic hemoglobin 2-like [Musa acuminata subsp. malaccensis]
c147059_g1	281.15	272.63	290.5	125.62	113.31	129.85	302.9	294.67	294.33	gi|672164153|ref|XP_008801945.1| PREDICTED: pescadillo homolog [Phoenix dactylifera]
c144298_g2	280.39	260.39	260.6	66.3	56.3	56.45	92.15	77.5	77.15	gi|743861182|ref|XP_010943210.1| PREDICTED: cinnamyl alcohol dehydrogenase 2-like [Elaeis guineensis]
c131550_g2	280.17	140.1	147.84	61.82	48.54	55.61	89.38	90.92	96.5	gi|1035956668|gb|OAY78219.1| Oleosin 16 kDa [Ananas comosus]
c142721_g1	279.6	257.54	259.66	195.9	186.38	202.04	631.7	615.74	629.07	gi|595928167|ref|XP_007215118.1| hypothetical protein PRUPE_ppa012969mg [Prunus persica] gi|645248978|ref|XP_008230538.1| PREDICTED: 60S ribosomal protein L27a-3-like [Prunus mume] gi|462411268|gb|EMJ16317.1| hypothetical protein PRUPE_ppa012969mg [Prunus persica]
c131975_g4	279.41	202.14	201.54	55.51	42.49	38.66	109.1	83.51	96.02	gi|848851833|ref|XP_012837374.1| PREDICTED: universal stress protein A-like protein isoform X1 [Erythranthe guttata] gi|604348519|gb|EYU46674.1| hypothetical protein MIMGU_mgv1a015298mg [Erythranthe guttata]
c126106_g2	278.84	258.84	322.81	112.61	102.61	146	218.71	250.37	203.71	gi|326534232|dbj|BAJ89466.1| predicted protein, partial [Hordeum vulgare subsp. vulgare]
c134301_g1	277.74	262.74	253.55	144.43	141.15	139.43	272.2	252.47	264.2	gi|672130253|ref|XP_008788654.1| PREDICTED: ATP synthase subunit delta&apos;, mitochondrial-like [Phoenix dactylifera]
c150381_g2	277.63	265.63	257.19	299.22	294.22	298.06	23.76	7.76	7.04	gi|386688300|gb|AFJ21580.1| cell wall invertase [Agave tequilana]
c131802_g1	277.39	254.49	271.74	196.61	161.16	174.72	172.2	159.06	169.37	gi|629085023|gb|KCW51380.1| hypothetical protein EUGRSUZ_J00924, partial [Eucalyptus grandis]
c146642_g6	277.18	238.52	271.96	55.89	54.4	48.48	268.02	309.76	263.88	gi|672123781|ref|XP_008785258.1| PREDICTED: small nuclear ribonucleoprotein Sm D2-like [Phoenix dactylifera]
c144146_g2	276.61	264.61	260.56	143.37	139.99	135.37	170.65	161.65	154.65	gi|763766090|gb|KJB33305.1| hypothetical protein B456_006G025300 [Gossypium raimondii]
c138856_g1	276.55	271.55	282.81	115.12	107.12	104.98	258.35	246.24	251.35	gi|672125549|ref|XP_008786196.1| PREDICTED: poly(rC)-binding protein 3-like [Phoenix dactylifera]
c149302_g1	274.68	243.65	269.46	27.05	17.42	19.64	41.4	42.93	37.26	gi|672167841|ref|XP_008803896.1| PREDICTED: probable peroxygenase 5 [Phoenix dactylifera]
c150144_g3	273.97	243.38	251.97	181.84	164.85	169.84	693.56	698.71	703.56	gi|743823936|ref|XP_010932648.1| PREDICTED: 5-methyltetrahydropteroyltriglutamate--homocysteine methyltransferase 2-like [Elaeis guineensis]
c134069_g1	273.19	239.42	248.19	156.05	127.04	121.05	403.78	378.78	362.82	gi|399525610|gb|AFP44117.1| 60S ribosomal protein [Lycoris longituba]
c138966_g5	273.04	253.04	227.88	270.55	260.55	280.3	286.69	231.47	271.69	-
c143942_g2	272.97	264.97	261.09	181.24	166.24	171.14	505.89	517.89	515.55	gi|695008804|ref|XP_009391002.1| PREDICTED: 40S ribosomal protein S4-3 [Musa acuminata subsp. malaccensis]
c138624_g5	271.75	263.75	265.49	197.17	182.17	174.2	371.92	383.92	389.59	gi|8778823|gb|AAF79822.1|AC026875_2 T6D22.2 [Arabidopsis thaliana]
c142822_g3	271.53	298.04	310.94	141.57	151.3	149.57	444.58	409.58	414.26	gi|1035940028|gb|OAY66693.1| 40S ribosomal protein SA [Ananas comosus]
c143435_g4	271.47	254.47	246.47	89.23	49.32	54.23	147.81	122.81	122.52	gi|743760668|ref|XP_010938213.1| PREDICTED: homocysteine S-methyltransferase 2-like isoform X2 [Elaeis guineensis]
c144996_g6	270.86	234.92	252.86	679.79	674.79	633.39	417.06	383.93	399.06	gi|413933380|gb|AFW67931.1| hypothetical protein ZEAMMB73_095591 [Zea mays]
c145328_g2	270.58	244.65	245.58	49.36	13.55	14.36	48.79	23.79	23.76	gi|743814056|ref|XP_010929915.1| PREDICTED: high-affinity nitrate transporter-activating protein 2.1 [Elaeis guineensis]
c123896_g1	269.81	219.16	220.21	286.57	188.9	203.6	92.72	80.77	65.79	gi|661891131|emb|CDP05013.1| unnamed protein product [Coffea canephora]
c134945_g2	269.16	260.64	237.22	37.23	24.92	31.05	31.27	23.84	22.7	gi|743777536|ref|XP_010919204.1| PREDICTED: uncharacterized protein LOC105043378 [Elaeis guineensis]
c143952_g3	268.95	256.95	258.9	649.5	610.91	641.5	1127.71	1118.71	1038.35	gi|743888071|ref|XP_010910533.1| PREDICTED: cysteine proteinase inhibitor 1-like [Elaeis guineensis]
c88849_g1	268.89	169.69	169.04	87.82	99.4	95.82	150.06	115.06	113.91	gi|743870412|ref|XP_010906036.1| PREDICTED: histone H1-like [Elaeis guineensis]
c132427_g1	268.17	248.17	250.95	176.68	166.68	174.08	190.26	165.85	175.26	gi|294847377|gb|ADF43731.1| monodehydroascorbate reductase [Lilium longiflorum]
c147219_g1	268	273.05	294.74	449.15	339.35	367.81	841.19	715.4	641.6	-
c142610_g8	267.24	255.24	268.56	74.17	65.47	66.17	72.75	63.75	65.39	-
c150360_g2	266.99	271.23	241.99	176.51	136.9	141.51	181.54	156.54	163.85	gi|694995670|ref|XP_009389843.1| PREDICTED: SUMO-conjugating enzyme SCE1 [Musa acuminata subsp. malaccensis]
c142001_g1	266.79	254.79	247.83	71.06	66.06	62.46	101.7	85.7	77.58	gi|695069493|ref|XP_009381726.1| PREDICTED: sucrose transport protein SUT1-like [Musa acuminata subsp. malaccensis]
c144240_g2	266.02	176.99	195.35	62.97	41.62	57.67	648.67	514.13	530.55	gi|195617544|gb|ACG30602.1| histone H4 [Zea mays]
c126301_g1	264.69	244.69	250.46	260.76	250.76	246.98	100.3	86.1	85.3	gi|743884987|ref|XP_010909818.1| PREDICTED: protein YLS9-like [Elaeis guineensis]
c141434_g2	264.17	249.17	255.19	179.25	178.57	174.25	396.32	409.87	388.32	gi|743837209|ref|XP_010936331.1| PREDICTED: 40S ribosomal protein S19-3-like [Elaeis guineensis]
c133862_g1	262.93	247.93	255.21	165.36	155	160.36	171.44	142.95	163.44	gi|720088160|ref|XP_010244367.1| PREDICTED: vacuolar protein sorting-associated protein 32 homolog 2 [Nelumbo nucifera] gi|720088163|ref|XP_010244368.1| PREDICTED: vacuolar protein sorting-associated protein 32 homolog 2 [Nelumbo nucifera]
c144424_g4	262.66	242.66	244.35	146.54	136.54	136.9	376.25	373.92	361.25	gi|19172403|gb|AAL85887.1|AF479058_1 70 kDa heat shock protein [Sandersonia aurantiaca]
c134262_g1	262.24	233.58	244.24	285.7	280.7	297.43	162.34	142.81	144.34	gi|721751189|gb|AIX10974.1| glyceraldehyde-3-phosphate dehydrogenase [Ornithogalum longebracteatum]
c147034_g3	261.8	246.8	282.62	212.27	212.44	207.27	231.95	216.37	223.95	gi|672115461|ref|XP_008780878.1| PREDICTED: apoptotic chromatin condensation inducer in the nucleus [Phoenix dactylifera] gi|672115463|ref|XP_008780880.1| PREDICTED: apoptotic chromatin condensation inducer in the nucleus [Phoenix dactylifera]
c149185_g2	260.04	167.04	223.84	227.39	112.42	116.27	321.44	297.47	271.39	gi|674931242|emb|CDY02235.1| BnaA03g39320D [Brassica napus]
c126304_g1	259.43	221.65	218.5	9.21	6.54	5.25	16.3	12.34	12.72	gi|672153780|ref|XP_008797604.1| PREDICTED: nitrile-specifier protein 5 [Phoenix dactylifera]
c110101_g1	259.1	258.75	197.48	3006.13	2905.11	3014.13	498.53	463.53	405.73	gi|1035957969|gb|OAY79299.1| Glutamine synthetase cytosolic isozyme 1-1 [Ananas comosus]
c140300_g4	258.56	238.56	248.98	36.08	26.08	22.63	250.34	226.25	235.34	gi|474054427|gb|EMS53744.1| F-box/LRR-repeat protein 4 [Triticum urartu]
c142276_g4	258.39	250.39	242.69	130.73	115.73	116.58	313.36	325.36	365.97	gi|944259212|gb|KQL23469.1| hypothetical protein SETIT_031424mg [Setaria italica]
c14886_g2	258.24	278.81	291.07	5.94	1.1	0.92	3.12	1.83	1.92	gi|672123830|ref|XP_008785285.1| PREDICTED: aquaporin PIP2-4 [Phoenix dactylifera]
c142317_g4	257.9	272.03	263.91	38.85	31.19	45.55	270.31	251.59	241.8	gi|674898277|emb|CDY34639.1| BnaC08g41980D [Brassica napus]
c135567_g3	255.24	246.72	246.41	47.41	35.1	34.18	83.04	78.48	74.47	gi|21715878|emb|CAD29579.1| proton-exporting ATPase, partial [Zea mays]
c143569_g2	254.15	160.88	236.15	90.36	85.36	103.56	153.54	125.89	135.54	gi|743779446|ref|XP_010920190.1| PREDICTED: putative E3 ubiquitin-protein ligase LIN-1 [Elaeis guineensis]
c143165_g1	253.64	245.28	249.26	104.54	95.49	85.37	30.99	31.92	26.43	gi|743766674|ref|XP_010913582.1| PREDICTED: homeobox-leucine zipper protein HOX16-like [Elaeis guineensis]
c141053_g3	253.56	233.56	244.28	198.64	188.64	194.71	512.14	494.72	497.14	gi|586678858|ref|XP_006840139.1| PREDICTED: 60S ribosomal protein L13a-4 [Amborella trichopoda] gi|548841838|gb|ERN01814.1| hypothetical protein AMTR_s00089p00040540 [Amborella trichopoda]
c143750_g3	253.21	233.21	228.86	417.53	407.53	411.44	433.72	412.49	418.72	gi|695037454|ref|XP_009406220.1| PREDICTED: auxin-responsive protein IAA21-like [Musa acuminata subsp. malaccensis]
c137517_g4	253.07	656.54	666.07	350.53	398.69	358.53	1061.71	1026.71	1031.8	gi|947094076|gb|KRH42661.1| hypothetical protein GLYMA_08G103700 [Glycine max]
c140015_g4	252.67	240.67	259.08	107.28	102.28	106.1	274.08	258.08	262.33	-
c129900_g2	252.41	172.97	176.37	66.1	59.06	60.66	95.03	88.73	85.76	gi|672182810|ref|XP_008811661.1| PREDICTED: pentatricopeptide repeat-containing protein At5g67570, chloroplastic isoform X2 [Phoenix dactylifera]
c145308_g1	251.93	231.93	235.28	312.34	302.34	294.42	347.06	347.39	332.06	-
c139936_g2	251.45	207.61	228.39	83.43	86.44	112.05	238	202.02	222.06	gi|848895101|ref|XP_012847591.1| PREDICTED: eukaryotic translation initiation factor 5A-4 [Erythranthe guttata] gi|604316625|gb|EYU28817.1| hypothetical protein MIMGU_mgv1a015401mg [Erythranthe guttata]
c136123_g1	250.49	230.49	228.04	177.84	167.84	166.24	409.55	385.7	394.55	-
c144245_g2	249.92	229.92	242.65	220.73	210.73	170.72	407.94	375.84	392.94	gi|629122577|gb|KCW87067.1| hypothetical protein EUGRSUZ_B03604 [Eucalyptus grandis]
c139411_g5	248.74	219.34	223.74	44.37	8.15	9.37	68.52	43.52	38.14	gi|743862181|ref|XP_010943471.1| PREDICTED: protein PRRC2A [Elaeis guineensis]
c148319_g2	248.57	240.95	243.35	72.17	65.42	64.76	126.85	123.34	122.71	gi|672184453|ref|XP_008812537.1| PREDICTED: citrate synthase, glyoxysomal [Phoenix dactylifera]
c148781_g1	248.06	236.06	237.96	181.57	176.57	166.68	195.84	179.84	181.53	gi|672175626|ref|XP_008807875.1| PREDICTED: ATPase 11, plasma membrane-type [Phoenix dactylifera] gi|672175628|ref|XP_008807876.1| PREDICTED: ATPase 11, plasma membrane-type [Phoenix dactylifera] gi|672175630|ref|XP_008807878.1| PREDICTED: ATPase 11, plasma membrane-type [Phoenix dactylifera] gi|672175632|ref|XP_008807879.1| PREDICTED: ATPase 11, plasma membrane-type [Phoenix dactylifera]
c149551_g2	247.19	242.19	237.2	152.65	144.65	124.13	210.62	211.53	203.62	gi|720010360|ref|XP_010259226.1| PREDICTED: stachyose synthase [Nelumbo nucifera]
c87670_g1	247.17	202	213.17	132.57	123.57	115.38	446.53	484.61	460.53	gi|470116918|ref|XP_004294619.1| PREDICTED: 60S ribosomal protein L35-2 [Fragaria vesca subsp. vesca]
c146330_g1	246.94	234.94	240.28	0	0.5	0	6.1	6.76	6.19	gi|695044766|ref|XP_009410147.1| PREDICTED: uncharacterized protein LOC103992240 [Musa acuminata subsp. malaccensis]
c140730_g4	246.81	284.95	302.71	206.61	218.19	214.61	584.94	549.94	561.13	gi|414589923|tpg|DAA40494.1| TPA: hypothetical protein ZEAMMB73_094482 [Zea mays]
c122811_g1	246.53	218.61	224.53	40.58	26.3	28.58	87.68	91.86	97.68	gi|695046204|ref|XP_009410920.1| PREDICTED: aspartate aminotransferase, cytoplasmic-like [Musa acuminata subsp. malaccensis]
c136468_g2	245.93	223.1	220.93	36.18	1.43	1.18	45.91	20.91	20.16	gi|743844173|ref|XP_010938261.1| PREDICTED: nicotianamine synthase 3-like [Elaeis guineensis]
c133497_g1	245.88	200.91	214.34	80.18	80.52	88.18	134.68	99.68	95.9	gi|937940587|dbj|BAT15499.1| Os12g0105975 [Oryza sativa Japonica Group]
c141511_g1	245.12	211.44	227.12	71.56	66.56	71.92	341.59	299.8	323.59	-
c146122_g3	244.72	214.81	219.72	257.2	216.73	222.2	338.45	313.45	322.69	gi|672131555|ref|XP_008789340.1| PREDICTED: shaggy-related protein kinase eta [Phoenix dactylifera]
c149230_g2	244.68	236.16	239.83	103.17	90.86	90.82	242.75	243.16	234.18	gi|743858322|ref|XP_010942326.1| PREDICTED: staphylococcal nuclease domain-containing protein 1-like [Elaeis guineensis]
c139238_g2	244.51	203.57	219.51	153.12	117.88	118.12	199.88	174.88	175.35	gi|695046226|ref|XP_009410933.1| PREDICTED: calcyclin-binding protein-like [Musa acuminata subsp. malaccensis]
c142917_g1	244.06	188.54	198.45	85.83	71.57	74.37	161.17	111.04	114.02	gi|672120293|ref|XP_008783409.1| PREDICTED: xylem serine proteinase 1-like [Phoenix dactylifera]
c147374_g3	243.17	234.65	231.74	0.33	0.45	0.17	1.14	2.25	1.53	gi|743886712|ref|XP_010910212.1| PREDICTED: 10-deacetylbaccatin III 10-O-acetyltransferase-like [Elaeis guineensis]
c146760_g1	242.61	227.61	232.95	48.74	49.98	43.74	310.79	320.91	302.79	gi|695064025|ref|XP_009420544.1| PREDICTED: glucose-6-phosphate/phosphate translocator 2, chloroplastic-like [Musa acuminata subsp. malaccensis]
c81563_g1	241.87	193.94	207.87	122.44	113.44	110.02	127.57	152.42	141.57	-
c137132_g3	241.82	162.52	175.21	9.79	8.8	4.57	162.43	113.58	119.34	gi|358680766|gb|AEU17779.1| gamma-tocopherol methyltransferase [Elaeis guineensis]
c143426_g1	241.51	221.51	222.91	68.54	58.54	61.02	233.94	216.04	218.94	gi|672107449|ref|XP_008811605.1| PREDICTED: T-complex protein 1 subunit delta-like [Phoenix dactylifera]
c150022_g1	241.49	227.84	219.49	172.85	162.85	160.85	353.23	360.69	363.23	gi|225433491|ref|XP_002265088.1| PREDICTED: UDP-glucuronate 4-epimerase 6 [Vitis vinifera]
c137185_g2	241.09	221.09	230.36	129.8	119.8	125.91	378.67	401.28	363.67	gi|695017862|ref|XP_009395874.1| PREDICTED: 60S ribosomal protein L12-1 [Musa acuminata subsp. malaccensis]
c130500_g1	240.82	233.69	242.7	188.99	131.85	127.34	111.63	118.7	124.54	gi|641857501|gb|KDO76246.1| hypothetical protein CISIN_1g023107mg [Citrus sinensis] gi|641857502|gb|KDO76247.1| hypothetical protein CISIN_1g023107mg [Citrus sinensis]
c141138_g1	240.67	199.89	215.67	156.42	109.17	121.42	159.13	134.13	128.18	gi|743772134|ref|XP_010916367.1| PREDICTED: uncharacterized protein LOC105041202 [Elaeis guineensis]
c146915_g5	240.59	210.03	218.59	72.87	53.66	60.87	42.23	47.75	52.23	gi|643733933|gb|KDP40776.1| hypothetical protein JCGZ_24775 [Jatropha curcas]
c130358_g5	240.34	228.34	229.2	8.28	7.28	7.03	238.92	222.92	224.23	gi|108706843|gb|ABF94638.1| transposon protein, putative, Mutator sub-class [Oryza sativa Japonica Group]
c144901_g1	240.21	184.6	206.21	77.73	68.73	64.18	298.84	329.38	312.84	gi|19979629|dbj|BAB88746.1| trypsin inhibitor [Allium cepa]
c78706_g1	239.92	207.58	215.21	28.57	21.25	31.43	48.87	31.02	22.36	-
c136122_g1	239.79	231.79	236.34	200.81	185.81	181.79	449.43	461.43	454.49	gi|672193286|ref|XP_008775991.1| PREDICTED: 60S ribosomal protein L18-2 [Phoenix dactylifera]
c145643_g4	239.78	144.31	142.98	99.05	107.36	107.05	194.07	159.07	169.15	gi|42565418|gb|AAS20982.1| unknown [Hyacinthus orientalis]
c144633_g6	239.03	231.03	217.3	158.89	143.89	147.22	307.51	319.51	339.58	gi|672112059|ref|XP_008803853.1| PREDICTED: 60S ribosomal protein L23A [Phoenix dactylifera]
c147925_g2	238.85	218.85	218.26	76.41	66.41	69.14	123.18	109.42	108.18	gi|743802754|ref|XP_010926713.1| PREDICTED: dynamin-related protein 3A-like [Elaeis guineensis]
c145178_g1	238.69	240.41	242.91	105.52	99.11	107.72	167.79	157.64	143.91	gi|514733225|ref|XP_004957625.1| PREDICTED: NADPH--cytochrome P450 reductase-like [Setaria italica] gi|944261427|gb|KQL25684.1| hypothetical protein SETIT_029087mg [Setaria italica]
c148938_g5	238.05	214	216.05	208.42	186.22	196.42	224.79	253.93	234.79	gi|719980686|ref|XP_010249884.1| PREDICTED: auxin-responsive protein IAA1 [Nelumbo nucifera]
c134882_g3	237.85	247.24	232.63	109.06	109.68	101.65	230.29	259.32	226.15	gi|672205043|ref|XP_008779075.1| PREDICTED: glycine-rich RNA-binding protein 3, mitochondrial-like, partial [Phoenix dactylifera]
c148061_g1	235.66	227.14	233.07	138.66	126.35	117.88	240.63	238.03	232.06	gi|743788797|ref|XP_010922756.1| PREDICTED: vacuolar-sorting receptor 1-like [Elaeis guineensis]
c136168_g1	235.65	227.13	244.95	243.62	231.31	231.46	529.11	528.06	520.54	gi|976929125|gb|KVI11987.1| Ribosomal protein S8 [Cynara cardunculus var. scolymus]
c145532_g1	235.46	251.79	230.24	149.66	137.61	142.25	542.98	565.98	538.84	gi|763751520|gb|KJB18908.1| hypothetical protein B456_003G074600 [Gossypium raimondii] gi|763751524|gb|KJB18912.1| hypothetical protein B456_003G074600 [Gossypium raimondii] gi|763751526|gb|KJB18914.1| hypothetical protein B456_003G074600 [Gossypium raimondii] gi|763751528|gb|KJB18916.1| hypothetical protein B456_003G074600 [Gossypium raimondii]
c144095_g4	235.45	356.75	370.63	72.27	77.92	80.27	199.32	164.32	161.71	-
c150027_g2	234.91	229.5	231.81	67.17	73.4	75.17	191.78	156.78	176.31	gi|743782922|ref|XP_010921275.1| PREDICTED: zinc finger CCCH domain-containing protein 53-like isoform X3 [Elaeis guineensis]
c136578_g3	234.33	214.33	221.18	329.46	319.46	341.12	166.23	162.99	151.23	gi|1035953068|gb|OAY75397.1| Vacuolar-processing enzyme [Ananas comosus]
c132230_g1	233.45	106.98	111.64	29.77	42.81	37.77	134.54	99.54	105.02	gi|720049362|ref|XP_010271418.1| PREDICTED: peptidyl-prolyl cis-trans isomerase Pin1 [Nelumbo nucifera]
c150029_g2	232.6	220.6	259.15	244.64	239.64	212.77	358.66	342.66	350.82	gi|743867774|ref|XP_010905393.1| PREDICTED: 26S proteasome non-ATPase regulatory subunit 14 homolog isoform X1 [Elaeis guineensis]
c101511_g1	232.5	234.81	229.67	56.42	50.56	54.89	39.37	28.8	35.74	-
c145835_g2	232.33	212.73	210.33	161.86	141.14	149.86	292.4	305.82	302.4	gi|1009150304|ref|XP_015892948.1| PREDICTED: ankyrin repeat domain-containing protein 2A [Ziziphus jujuba]
c123073_g1	231.98	238.76	249.97	194.71	126.64	119.72	304.21	273.49	256.03	gi|743804945|ref|XP_010927316.1| PREDICTED: uncharacterized protein LOC105049390 [Elaeis guineensis]
c140970_g2	231.97	209.57	213.97	180.43	175.43	170.53	178.28	153.56	160.28	gi|1035962195|gb|OAY82848.1| Stem-specific protein TSJT1, partial [Ananas comosus]
c113089_g1	231.72	200.36	197.72	126.29	117.29	125.98	123.57	132.37	137.57	gi|743810357|ref|XP_010928880.1| PREDICTED: serine/threonine-protein phosphatase PP-X isozyme 2-like [Elaeis guineensis]
c130471_g1	231.55	195.53	206.55	37.2	0.83	2.2	30.95	5.95	6.52	gi|296080874|emb|CBI18803.3| unnamed protein product [Vitis vinifera]
c146079_g4	231.54	219.54	229	156.78	151.78	149.36	365.8	349.8	350.49	gi|695046031|ref|XP_009410828.1| PREDICTED: ketol-acid reductoisomerase, chloroplastic-like [Musa acuminata subsp. malaccensis]
c142303_g1	231.14	219.14	230.36	115.59	110.59	114.8	133.83	117.83	121.31	gi|672141126|ref|XP_008794380.1| PREDICTED: probable serine incorporator [Phoenix dactylifera]
c134923_g2	229.97	217.97	225.75	69.06	64.06	70.63	128.72	112.72	106.05	gi|695000735|ref|XP_009413244.1| PREDICTED: UBA and UBX domain-containing protein At4g15410-like [Musa acuminata subsp. malaccensis]
c141441_g1	229.59	193.67	195.59	47.08	38.08	43.91	67.22	82.16	81.22	gi|695029881|ref|XP_009402379.1| PREDICTED: zinc finger CCCH domain-containing protein 33-like [Musa acuminata subsp. malaccensis]
c147871_g2	229.34	170.67	176.64	97.14	108.41	105.14	275.35	240.35	245.15	gi|47026900|gb|AAT08672.1| ribosomal protein L19 [Hyacinthus orientalis]
c121185_g2	228.48	186.18	194.48	157.54	148.54	150.95	99.2	113.21	113.2	gi|743849019|ref|XP_010939515.1| PREDICTED: V-type proton ATPase subunit D-like [Elaeis guineensis]
c145075_g1	227.96	215.96	232.57	5.25	0.25	0.16	18.63	2.63	3.44	gi|743796537|ref|XP_010924753.1| PREDICTED: BURP domain-containing protein 3-like [Elaeis guineensis]
c134939_g1	227.95	222.95	219.57	183.69	175.69	165.15	327.27	308.13	320.27	gi|922430278|ref|XP_013621197.1| PREDICTED: tubulin alpha-3 chain-like isoform X2 [Brassica oleracea var. oleracea]
c131656_g3	226.78	211.78	225.25	81.84	79.29	76.84	101.76	104.64	93.76	gi|1035946007|gb|OAY70493.1| Dynein heavy chain-like protein [Ananas comosus]
c142606_g2	226.74	221.74	238.03	103.96	95.96	92.68	203.82	213.74	196.82	gi|743839845|ref|XP_010937112.1| PREDICTED: NAP1-related protein 2-like isoform X5 [Elaeis guineensis]
c138760_g1	226.69	190.73	192.69	217.77	208.77	197.91	162.44	171.2	176.44	gi|672197047|ref|XP_008776970.1| PREDICTED: cytochrome b-c1 complex subunit Rieske-4, mitochondrial-like [Phoenix dactylifera]
c138759_g1	226.61	218.61	228.79	160.5	145.5	136.84	207.2	219.2	216.86	gi|743840653|ref|XP_010937324.1| PREDICTED: proteasome subunit alpha type-6 [Elaeis guineensis]
c147357_g1	225.87	202.59	203.87	46.92	38.04	34.92	43.11	52.57	53.11	gi|672108320|ref|XP_008784548.1| PREDICTED: LOW QUALITY PROTEIN: beta-xylosidase/alpha-L-arabinofuranosidase 2-like [Phoenix dactylifera]
c107055_g2	225.68	217.68	245.4	40.68	25.68	29.42	47.84	59.84	66.1	gi|672136530|ref|XP_008791967.1| PREDICTED: protein GDAP2 homolog [Phoenix dactylifera]
c140335_g1	225.62	213.62	221.45	175.92	163.88	167.92	202.47	193.47	195.13	gi|672165309|ref|XP_008802554.1| PREDICTED: 5&apos;-methylthioadenosine/S-adenosylhomocysteine nucleosidase 2-like [Phoenix dactylifera]
c137117_g1	225.23	149.35	154.21	381.4	90.63	103.91	637.39	186.4	192.04	gi|242040089|ref|XP_002467439.1| hypothetical protein SORBIDRAFT_01g028100 [Sorghum bicolor] gi|241921293|gb|EER94437.1| hypothetical protein SORBI_001G286200 [Sorghum bicolor]
c148526_g1	224.95	209.95	213.61	187	178.07	182	143.83	142.66	135.83	gi|108864082|gb|ABA91837.2| retrotransposon protein, putative, unclassified [Oryza sativa Japonica Group]
c140933_g5	224.16	173.34	186.6	159.65	48.36	53.43	360.33	117.77	120.83	gi|720035589|ref|XP_010267090.1| PREDICTED: zinc finger CCCH domain-containing protein 20-like [Nelumbo nucifera]
c143404_g4	224.07	207.62	218.85	179.38	173.37	171.97	176.15	173.48	172.01	gi|151564277|gb|ABS17589.1| SKP1 component-like 1 [Humulus lupulus]
c142462_g1	223.87	199.93	198.87	129.5	97.44	94.5	266.52	241.52	238.77	gi|1035943410|gb|OAY68774.1| hypothetical protein ACMD2_09739 [Ananas comosus]
c129948_g1	223.74	203.43	218.52	79.73	72.19	72.32	209.3	207.12	205.16	gi|695026057|ref|XP_009400303.1| PREDICTED: probable rRNA-processing protein EBP2 homolog [Musa acuminata subsp. malaccensis] gi|695026059|ref|XP_009400304.1| PREDICTED: probable rRNA-processing protein EBP2 homolog [Musa acuminata subsp. malaccensis]
c136735_g1	223.69	218.69	237	223.08	215.08	210.02	225.35	255.62	218.35	gi|672175401|ref|XP_008807752.1| PREDICTED: protein DEHYDRATION-INDUCED 19 homolog 2-like [Phoenix dactylifera] gi|672175403|ref|XP_008807754.1| PREDICTED: protein DEHYDRATION-INDUCED 19 homolog 2-like [Phoenix dactylifera]
c138216_g1	223.47	203.47	205.23	106.04	96.04	91.61	184.23	179.26	169.23	gi|672110573|ref|XP_008796188.1| PREDICTED: splicing factor U2af small subunit B-like [Phoenix dactylifera]
c146604_g2	222.97	210.97	220.39	15.15	10.15	9.71	47.16	31.16	30.9	gi|1035922893|gb|OAY52482.1| hypothetical protein MANES_04G087000, partial [Manihot esculenta]
c141482_g3	222.29	175.62	188.29	63.23	54.23	57.34	130.93	135	144.93	gi|695077556|ref|XP_009386124.1| PREDICTED: uncharacterized protein LOC103973319 [Musa acuminata subsp. malaccensis]
c107689_g1	221.05	209.05	225.41	108.33	102.83	100.33	292.86	283.86	281.13	gi|514813265|ref|XP_004981416.1| PREDICTED: histone H1-like [Setaria italica]
c136513_g3	220.83	215.83	218.95	32.79	24.79	21.25	58.51	43.13	51.51	gi|1035957543|gb|OAY78939.1| Cationic amino acid transporter 2, vacuolar [Ananas comosus]
c136499_g2	220.53	246.47	256.53	98.25	112.98	106.25	268.37	233.37	231.81	gi|47026989|gb|AAT08712.1| nucleoside diphosphate kinase [Hyacinthus orientalis]
c137001_g3	220.14	215.88	214.92	179	156.2	171.59	252.75	243.94	248.61	gi|33325117|gb|AAQ08191.1| eukaryotic translation initiation factor 5A isoform I [Hevea brasiliensis] gi|33325119|gb|AAQ08192.1| eukaryotic translation initiation factor 5A isoform II [Hevea brasiliensis]
c121054_g2	220.13	211.61	210.63	120.08	107.77	105.77	109.79	101.45	101.22	gi|557882401|gb|AHA42652.1| GTP-binding Rab2a-like protein, partial [Lumnitzera racemosa]
c143380_g5	220.03	225.81	202.03	144.91	139.91	138.16	111.86	95.67	93.86	-
c131332_g2	219.59	192.1	197.59	149.04	135.37	137.04	146.22	157.07	156.22	gi|985701067|ref|NP_001306839.1| superoxide dismutase [Mn], mitochondrial-like precursor [Elaeis guineensis] gi|406870049|gb|AFS65098.1| manganese superoxide dismutase [Elaeis guineensis]
c138232_g3	219.1	180.5	185.1	84.8	75.8	84.24	282.01	296.03	296.01	-
c145497_g3	217.95	181.85	192.95	202.97	164.43	167.97	125.24	100.24	98.84	gi|672200823|ref|XP_008777977.1| PREDICTED: NAC transcription factor 25-like [Phoenix dactylifera]
c148918_g4	217.69	202.69	196.8	71.36	69.31	66.36	131.86	130.73	123.86	gi|743799414|ref|XP_010925469.1| PREDICTED: casein kinase I isoform delta-like isoform X2 [Elaeis guineensis]
c281804_g1	216.48	208.48	204.27	144.2	129.2	141.05	137.11	149.11	150.82	gi|729386858|ref|XP_010551520.1| PREDICTED: ubiquitin-conjugating enzyme E2 2-like isoform X3 [Tarenaya hassleriana]
c133342_g2	216.21	201.21	219.48	145.76	140.84	140.76	278.46	282.11	270.46	gi|763806390|gb|KJB73328.1| hypothetical protein B456_011G230200 [Gossypium raimondii]
c150602_g1	215.87	196.57	197.87	125.28	120.28	136.36	128.22	116.5	110.22	gi|296084724|emb|CBI25866.3| unnamed protein product [Vitis vinifera]
c46613_g1	215.33	217.5	182.19	271.4	129.97	147.04	1021.65	278.26	348.77	gi|566201513|ref|XP_006376569.1| hypothetical protein POPTR_0013s15570g, partial [Populus trichocarpa] gi|550325925|gb|ERP54366.1| hypothetical protein POPTR_0013s15570g, partial [Populus trichocarpa]
c138096_g5	215.21	145.26	148.89	56.11	60.31	64.11	190.6	155.6	152.48	gi|695032041|ref|XP_009403552.1| PREDICTED: nuclear transport factor 2 [Musa acuminata subsp. malaccensis]
c139077_g1	215.15	183.74	182.28	12.42	14.03	12.88	34.27	35.94	33.02	gi|743755643|ref|XP_010912563.1| PREDICTED: pyruvate decarboxylase 1 [Elaeis guineensis]
c144793_g1	215.02	200.02	201.36	98.03	88.97	93.03	164.94	160.58	156.94	gi|695052759|ref|XP_009414448.1| PREDICTED: uncharacterized protein LOC103995568 isoform X2 [Musa acuminata subsp. malaccensis]
c128622_g1	214.88	194.88	199.18	17.3	7.3	6.7	38.72	23.44	23.72	gi|672177832|ref|XP_008809024.1| PREDICTED: F-box/kelch-repeat protein At1g80440-like [Phoenix dactylifera]
c138595_g1	214.86	194.86	193.15	138.64	128.64	124.53	288.04	273.62	273.04	gi|1035960745|gb|OAY81605.1| Peroxiredoxin-2C [Ananas comosus]
c140125_g1	214.83	186.39	192.83	81.5	77.85	69.5	153.11	155.38	163.11	gi|672181852|ref|XP_008811158.1| PREDICTED: cinnamoyl-CoA reductase 1 [Phoenix dactylifera]
c132056_g2	214.56	177.95	196.56	84.96	79.96	67.58	64.77	49.22	46.77	-
c147047_g2	213.73	205.21	205	100.46	88.15	107.37	151.4	136.03	142.83	gi|672129938|ref|XP_008788490.1| PREDICTED: ERI1 exoribonuclease 2-like [Phoenix dactylifera] gi|672129940|ref|XP_008788491.1| PREDICTED: ERI1 exoribonuclease 2-like [Phoenix dactylifera]
c146120_g1	213.18	208.18	201.36	71.29	63.29	67.98	185.04	177.37	178.04	gi|212723364|ref|NP_001132735.1| uncharacterized protein LOC100194222 [Zea mays] gi|194695258|gb|ACF81713.1| unknown [Zea mays] gi|413923726|gb|AFW63658.1| hypothetical protein ZEAMMB73_233372 [Zea mays]
c148806_g1	212.82	207.82	203.73	227.69	219.69	213.84	180.57	188.84	173.57	gi|743804479|ref|XP_010927201.1| PREDICTED: splicing factor 3B subunit 1-like [Elaeis guineensis] gi|743804483|ref|XP_010927202.1| PREDICTED: splicing factor 3B subunit 1-like [Elaeis guineensis] gi|743804487|ref|XP_010927203.1| PREDICTED: splicing factor 3B subunit 1-like [Elaeis guineensis]
c146580_g4	212.48	818.74	817.05	0.74	0.51	0.58	47.36	12.36	9.45	gi|672112325|ref|XP_008805175.1| PREDICTED: asparagine synthetase [glutamine-hydrolyzing] [Phoenix dactylifera]
c142588_g1	212.37	217.22	206.63	380.39	363.83	339.14	191.7	170.47	174.59	gi|672137924|ref|XP_008792700.1| PREDICTED: serine/threonine-protein kinase SAPK10 [Phoenix dactylifera]
c165233_g1	212.34	185.12	178.34	62.66	53.66	58.12	3.09	14.41	17.09	-
c130563_g1	212.17	171.97	187.17	152.54	124.5	117.54	201.87	176.87	164.12	gi|42565486|gb|AAS21010.1| unknown [Hyacinthus orientalis]
c146065_g4	211.65	196.65	204.55	96.02	90.31	91.02	208.84	207.67	200.84	gi|672135719|ref|XP_008791533.1| PREDICTED: protein disulfide isomerase-like 1-4 [Phoenix dactylifera]
c134169_g3	211.37	203.37	208.14	214.06	199.06	196.06	225.22	237.22	233.5	gi|743881834|ref|XP_010909007.1| PREDICTED: endoglucanase 10-like [Elaeis guineensis]
c134159_g2	211.29	226.66	232.1	53.66	48.8	51.43	547.1	508.09	551.51	-
c148733_g1	210.44	195.44	208.7	187.13	203.79	182.13	208.26	204.18	200.26	gi|672158799|ref|XP_008799143.1| PREDICTED: squamosa promoter-binding-like protein 15 [Phoenix dactylifera]
c134132_g1	209.68	201.68	199.13	175.15	160.15	155.44	163.73	175.73	169.53	gi|1035960561|gb|OAY81446.1| Methyl-CpG-binding domain-containing protein 11 [Ananas comosus]
c141253_g2	209.17	162.16	175.17	68.48	59.48	61.96	85	98.68	99	gi|695013790|ref|XP_009393689.1| PREDICTED: pre-mRNA-splicing factor 38 [Musa acuminata subsp. malaccensis]
c126565_g1	209.11	156.6	153.24	74.52	76.88	71.76	105.91	109.92	114.59	gi|672118956|ref|XP_008782703.1| PREDICTED: NADH dehydrogenase [ubiquinone] 1 alpha subcomplex subunit 1 [Phoenix dactylifera] gi|672118958|ref|XP_008782704.1| PREDICTED: NADH dehydrogenase [ubiquinone] 1 alpha subcomplex subunit 1 [Phoenix dactylifera]
c149086_g2	208.39	155.86	183.39	258.69	211.47	223.69	317.96	292.96	287.08	gi|20197614|gb|AAM15154.1| unknown protein [Arabidopsis thaliana] gi|20198162|gb|AAM15435.1| unknown protein [Arabidopsis thaliana]
c138940_g3	208.31	193.31	188.39	273.38	275.1	268.38	337.84	314.58	329.84	gi|334701497|gb|AEG89523.1| tubulin beta-6 [Brassica oleracea var. italica]
c132032_g1	208.05	200.05	205.5	176.49	161.49	165.89	216.23	228.23	240.84	gi|901808381|gb|KMZ65259.1| Proteasome subunit alpha type-7 [Zostera marina]
c124867_g2	207.43	195.43	173.16	0.38	0.71	0	2.56	2.15	2.36	gi|1035937231|gb|OAY65132.1| 7-deoxyloganetic acid glucosyltransferase, partial [Ananas comosus]
c139480_g1	207.41	199.41	212.45	102.6	87.6	90.35	144.8	156.8	151.24	gi|743777246|ref|XP_010919047.1| PREDICTED: FAM10 family protein At4g22670-like [Elaeis guineensis]
c66585_g1	207.18	195.18	191.91	100.16	95.16	97.24	167.88	151.88	151.59	gi|1035939377|gb|OAY66341.1| NADH dehydrogenase (ubiquinone) 1 alpha subcomplex subunit 6 [Ananas comosus]
c147291_g6	206.32	198.32	195.86	89.64	74.64	70.23	303.48	315.48	325.71	gi|743872181|ref|XP_010906476.1| PREDICTED: FRIGIDA-like protein 4a [Elaeis guineensis]
c132109_g1	206.22	170.57	181.22	40.21	3.51	5.21	5.28	4.3	4.63	gi|695004649|ref|XP_009388741.1| PREDICTED: 21 kDa protein-like [Musa acuminata subsp. malaccensis]
c144383_g1	205.7	190.29	200.48	196.8	194.81	189.39	364.82	362.51	360.68	gi|743755254|ref|XP_010941084.1| PREDICTED: nucleosome assembly protein 1;2-like isoform X3 [Elaeis guineensis]
c141885_g3	205.53	200.53	211	109.18	101.18	95.2	107.93	111	100.93	gi|672138202|ref|XP_008792848.1| PREDICTED: LOW QUALITY PROTEIN: probable nucleoredoxin 1 [Phoenix dactylifera]
c149786_g2	205.41	185.41	194.91	15.1	5.1	5.21	22.47	6.73	7.47	gi|296087169|emb|CBI33543.3| unnamed protein product [Vitis vinifera]
c142025_g1	205.28	185.28	245.7	175.71	165.71	106.63	41.61	11.81	26.61	-
c132880_g1	204.81	170.32	170.81	75.07	66.07	60.32	74.25	91.74	88.25	gi|474275084|gb|EMS61044.1| Eukaryotic translation initiation factor 4E-1 [Triticum urartu]
c60390_g2	204.74	184.74	198.56	80.71	70.71	69.43	224.66	232.6	209.66	gi|661891863|emb|CDP04089.1| unnamed protein product [Coffea canephora]
c134764_g3	204.73	185.43	183.29	81.8	62.8	75.97	253.28	185.56	176.17	gi|743842760|ref|XP_010937888.1| PREDICTED: ran-binding protein 1 homolog b-like [Elaeis guineensis]
c147717_g4	204.55	199.55	243.74	423.66	415.66	362.97	270.9	311.35	263.9	gi|1035938323|gb|OAY65699.1| putative disease resistance protein RGA4 [Ananas comosus]
c130392_g1	204.27	159.88	170.27	87.1	78.1	72.48	102.07	111.66	116.07	gi|1035955600|gb|OAY77374.1| Importin subunit alpha-1a [Ananas comosus]
c135723_g6	203.2	174.79	178.2	163.49	131.6	128.49	221.61	196.61	194.08	gi|1035934755|gb|OAY63739.1| V-type proton ATPase subunit G [Ananas comosus]
c150039_g1	203.07	198.07	200.88	171.74	163.74	158.16	105.25	99.77	98.25	gi|743804527|ref|XP_010927214.1| PREDICTED: putative inactive cadmium/zinc-transporting ATPase HMA3 [Elaeis guineensis]
c140663_g4	202.86	187.86	194.34	150.67	139.32	145.67	250.49	240.76	242.49	gi|743813482|ref|XP_010929734.1| PREDICTED: protein BONZAI 1-like [Elaeis guineensis]
c146099_g3	202.58	191.32	177.58	132.05	99.11	97.05	46.21	40.89	37.46	gi|695012435|ref|XP_009392977.1| PREDICTED: B2 protein-like [Musa acuminata subsp. malaccensis]
c51666_g1	202.5	179.28	177.5	72.35	41.3	37.35	94.03	69.03	70.74	gi|695003556|ref|XP_009386035.1| PREDICTED: 6-phosphogluconate dehydrogenase, decarboxylating 2, chloroplastic-like [Musa acuminata subsp. malaccensis]
c144852_g3	202.48	165.03	168.48	146.39	137.39	142.94	165.75	159.71	179.75	gi|1035959364|gb|OAY80448.1| hypothetical protein ACMD2_05773 [Ananas comosus]
c129461_g1	202.27	190.27	194.85	181	175.2	173	165.14	156.14	151.97	gi|743761593|ref|XP_010943025.1| PREDICTED: NADH-ubiquinone oxidoreductase subunit 8-like [Elaeis guineensis]
c136575_g1	201.72	193.2	193.81	47.25	34.94	36.48	29.24	18.27	20.67	gi|743823339|ref|XP_010932504.1| PREDICTED: D-galacturonate reductase-like [Elaeis guineensis]
c134954_g7	201.66	173.74	179.66	192.56	194.66	180.56	250.17	240.3	260.17	gi|723899907|gb|AIY24426.1| phosphate transporter [Manihot esculenta] gi|1035918432|gb|OAY48023.1| hypothetical protein MANES_06G125300 [Manihot esculenta]
c130833_g1	201.45	146.92	167.45	84.2	75.2	80.12	107.9	116.06	121.9	gi|697184236|ref|XP_009601143.1| PREDICTED: cell number regulator 8-like [Nicotiana tomentosiformis] gi|1025007698|ref|XP_016441970.1| PREDICTED: cell number regulator 8-like [Nicotiana tabacum]
c145602_g1	201.07	193.07	189.37	151.88	136.88	145.5	207.44	219.44	215.33	gi|695034683|ref|XP_009404804.1| PREDICTED: UDP-D-apiose/UDP-D-xylose synthase 2-like [Musa acuminata subsp. malaccensis]
c121004_g1	200.9	195.8	211.58	103	82.09	90.71	440.42	311.51	310.49	gi|695019088|ref|XP_009396530.1| PREDICTED: 60S ribosomal protein L27-like [Musa acuminata subsp. malaccensis]
c114810_g2	200.37	188.37	193.43	38.6	31.47	30.6	144.24	135.24	132.28	gi|970025246|ref|XP_015073937.1| PREDICTED: mediator-associated protein 1-like [Solanum pennellii]
c146645_g1	200.32	173.11	175.32	168.1	135.62	133.1	82.09	57.09	59.95	gi|672129693|ref|XP_008788360.1| PREDICTED: primary amine oxidase-like [Phoenix dactylifera]
c141655_g4	199.92	166.34	174.92	78.49	42.25	43.49	148.37	123.37	126.14	gi|695058517|ref|XP_009417576.1| PREDICTED: annexin D7-like isoform X2 [Musa acuminata subsp. malaccensis]
c137252_g1	199.91	184.91	174.59	82.29	78.15	77.29	154.16	150.71	146.16	gi|1035916185|gb|OAY45777.1| hypothetical protein MANES_07G090500 [Manihot esculenta]
c142292_g1	199.54	169.38	178.77	76.97	74.03	79.33	199.88	157.29	160.11	gi|672107177|ref|XP_008798094.1| PREDICTED: mitochondrial import inner membrane translocase subunit TIM17-2-like [Phoenix dactylifera] gi|672107179|ref|XP_008798179.1| PREDICTED: mitochondrial import inner membrane translocase subunit TIM17-2-like [Phoenix dactylifera]
c140421_g2	198.84	761.42	785.02	198.27	207.53	206.27	785.36	750.36	749.06	gi|743793268|ref|XP_010923889.1| PREDICTED: polyadenylate-binding protein RBP45-like [Elaeis guineensis]
c143682_g2	198.65	186.65	193.26	86.56	81.56	75.13	211	195	212.24	gi|1169382|sp|P42824.1|DNJH2_ALLPO RecName: Full=DnaJ protein homolog 2; Flags: Precursor gi|454303|emb|CAA54720.1| LDJ2 [Allium ampeloprasum]
c127475_g1	198.41	410.59	455.42	131.63	112.33	139.63	329.84	294.84	268.91	gi|743802316|ref|XP_010926581.1| PREDICTED: protein BOBBER 1-like [Elaeis guineensis] gi|743802320|ref|XP_010926582.1| PREDICTED: protein BOBBER 1-like [Elaeis guineensis]
c138468_g1	198.35	229.38	238.07	173.92	178.5	181.92	564.35	529.35	558.69	-
c148665_g1	198.14	183.14	189.17	109.19	109.08	104.19	162.01	161.4	154.01	gi|731911442|gb|AIZ68202.1| KH domain-containing protein At4g18375-like isoform X2 [Ornithogalum longebracteatum]
c148071_g1	197.71	185.71	185.77	116.98	111.98	116.44	145.78	129.78	134.49	gi|672114931|ref|XP_008779162.1| PREDICTED: uncharacterized protein LOC103698888 [Phoenix dactylifera]
c139315_g2	197.45	155.62	163.45	13.73	4.73	4.98	7.63	22.15	21.63	-
c132261_g2	197.31	182.13	194.1	93.81	79.81	79.55	94.19	97.79	87.94	gi|672107097|ref|XP_008793877.1| PREDICTED: BTB/POZ domain-containing protein POB1 [Phoenix dactylifera]
c147296_g5	196.86	184.86	187.58	138.05	133.05	126.26	174.47	158.47	148.35	gi|672114617|ref|XP_008777784.1| PREDICTED: zinc finger protein VAR3, chloroplastic [Phoenix dactylifera]
c132740_g1	195.67	172.86	170.67	117.3	94.5	82.3	227.79	202.79	202.8	gi|720036631|ref|XP_010267415.1| PREDICTED: protein GPR107-like [Nelumbo nucifera]
c132525_g3	195.59	190.59	192.54	74.64	66.64	72.1	325.24	327.22	318.24	gi|672172998|ref|XP_008806614.1| PREDICTED: 60S ribosomal protein L30 [Phoenix dactylifera]
c112617_g2	195.39	127	170.39	109.06	173	74.06	150.84	125.84	132.86	gi|697108135|ref|XP_009607915.1| PREDICTED: ubiquitin, partial [Nicotiana tomentosiformis]
c141096_g1	195.11	186.59	183.21	82.6	70.29	70.18	126.35	116.93	117.78	gi|672157104|ref|XP_008798248.1| PREDICTED: putative cyclin-dependent serine/threonine-protein kinase DDB_G0272797/DDB_G0274007 [Phoenix dactylifera]
c137928_g2	194.9	165.8	169.9	93.25	58.01	58.25	251.82	226.82	221	-
c144477_g2	194.88	189.88	188.36	126.25	118.25	111.03	149.25	147.41	142.25	gi|743863979|ref|XP_010943917.1| PREDICTED: ubiquitin domain-containing protein DSK2b-like isoform X2 [Elaeis guineensis]
c145370_g1	194.53	172.06	176.53	71.27	66.27	54.64	102.75	88.7	84.75	gi|305387431|gb|ADM52185.1| type II metacaspase [Hevea brasiliensis] gi|1023511204|gb|ANB41198.1| metacaspase 8 [Hevea brasiliensis]
c149346_g3	194.18	153.24	169.18	76.68	44.74	41.68	69.73	44.73	52.04	gi|743871068|ref|XP_010906199.1| PREDICTED: protein DEK-like isoform X1 [Elaeis guineensis] gi|743871072|ref|XP_010906200.1| PREDICTED: protein DEK-like isoform X1 [Elaeis guineensis] gi|743871080|ref|XP_010906201.1| PREDICTED: protein DEK-like isoform X1 [Elaeis guineensis]
c141273_g1	193.27	191.68	180.06	88.67	66.09	82.45	596.98	502.99	523.89	gi|473811885|gb|EMS46806.1| Histone H4 [Triticum urartu]
c60437_g1	192.79	172.79	186.52	45.68	35.68	42.66	78.71	67.74	63.71	gi|764569242|ref|XP_011462415.1| PREDICTED: 6-phosphogluconate dehydrogenase, decarboxylating 2, chloroplastic [Fragaria vesca subsp. vesca]
c132541_g1	192.43	180.43	178.99	166.29	161.29	177.91	302.33	286.33	297.32	gi|567908429|ref|XP_006446528.1| hypothetical protein CICLE_v10017502mg [Citrus clementina] gi|557549139|gb|ESR59768.1| hypothetical protein CICLE_v10017502mg [Citrus clementina]
c139081_g1	192.06	187.06	181.06	136.6	128.6	126.78	201.64	204.8	194.64	gi|743834511|ref|XP_010935550.1| PREDICTED: proteasome subunit alpha type-2-A [Elaeis guineensis]
c130782_g1	191.89	183.37	174.35	64.58	52.27	51.39	114.45	105.67	105.88	gi|1002281825|ref|XP_015645205.1| PREDICTED: mitochondrial import inner membrane translocase subunit TIM14-1 [Oryza sativa Japonica Group]
c145354_g1	191.84	174.03	173.84	93.98	88.98	88.74	433.94	395.27	415.94	-
c107728_g1	191.64	327.76	373.18	17.05	27.05	25.05	168.52	133.52	145.22	gi|604321556|gb|EYU32132.1| hypothetical protein MIMGU_mgv1a011344mg [Erythranthe guttata]
c145412_g7	191.46	189.7	214.43	260.45	253.82	270.25	262.46	281.29	234.4	gi|743793462|ref|XP_011047217.1| PREDICTED: V-type proton ATPase subunit c1 [Populus euphratica]
c113745_g1	190.45	182.14	220.83	74.31	73.86	72.56	122.79	115.11	141.34	gi|225433491|ref|XP_002265088.1| PREDICTED: UDP-glucuronate 4-epimerase 6 [Vitis vinifera]
c148911_g1	190.02	178.02	192.25	36.61	31.72	28.61	129.6	120.6	125.43	-
c118705_g1	189.6	175.88	164.6	36.51	4.91	1.51	47.63	22.63	24.13	-
c142210_g1	189.35	177.35	178.61	112.75	107.11	104.75	214.81	205.81	192.19	gi|720018409|ref|XP_010261777.1| PREDICTED: oligouridylate-binding protein 1-like isoform X2 [Nelumbo nucifera]
c131552_g3	188.33	272.39	274.74	5.8	4.22	3.04	65.39	30.39	34.34	gi|1035934595|gb|OAY63597.1| putative xyloglucan endotransglucosylase/hydrolase protein 32 [Ananas comosus]
c143029_g1	188.24	176.83	183.41	90.15	93.79	98.15	134.83	99.83	107.48	gi|743779230|ref|XP_010920078.1| PREDICTED: neutral alpha-glucosidase C isoform X2 [Elaeis guineensis]
c135879_g1	188.02	176.02	188.42	1049.93	1065.55	1041.93	323.62	314.62	326.7	gi|695014129|ref|XP_009393873.1| PREDICTED: chaperone protein ClpC1, chloroplastic [Musa acuminata subsp. malaccensis]
c138857_g2	187.76	179.76	179.17	84.49	69.49	68.82	82.38	94.38	97.96	gi|743759542|ref|XP_010932730.1| PREDICTED: probable ubiquitin-conjugating enzyme E2 16 [Elaeis guineensis]
c148710_g3	187.63	179.63	183.08	121.2	106.2	111.22	162.15	174.15	175.05	gi|743792284|ref|XP_010923643.1| PREDICTED: proteasome subunit beta type-2-B [Elaeis guineensis]
c34262_g1	187.32	158.25	153.32	44.17	35.17	28.34	63.36	98.9	77.36	gi|629091289|gb|KCW57284.1| hypothetical protein EUGRSUZ_H00084 [Eucalyptus grandis]
c148317_g1	186.96	178.96	174.71	152.3	137.3	126.23	281.28	293.28	295.67	gi|18157218|emb|CAD20821.1| alpha tubulin, partial [Zea mays]
c142910_g1	186.9	178.38	185.12	91.04	78.73	78.29	176.08	171.45	167.51	gi|672125209|ref|XP_008786018.1| PREDICTED: eukaryotic translation initiation factor 3 subunit M isoform X1 [Phoenix dactylifera]
c147333_g1	186.9	196.71	181.68	93.21	88.02	85.8	182.82	172.32	178.68	gi|315585206|gb|ADU34124.1| hypothetical protein [Vitis labrusca]
c146061_g3	186.64	150.54	161.64	104.27	77.24	69.27	154.83	129.83	128.87	gi|747065202|ref|XP_011079225.1| PREDICTED: proteasome subunit alpha type-3-like [Sesamum indicum]
c148364_g1	186.32	198.33	183.11	141	127	130.31	166.19	171.34	159.94	gi|695072600|ref|XP_009383429.1| PREDICTED: angio-associated migratory cell protein [Musa acuminata subsp. malaccensis]
c150466_g3	186.29	161.84	174.79	56.16	59.02	60.8	65.14	62.11	66.99	gi|720093391|ref|XP_010246035.1| PREDICTED: ABC transporter F family member 3-like isoform X3 [Nelumbo nucifera]
c149063_g2	186.23	181.23	166.15	131.94	123.94	117.83	173.49	144.59	166.49	gi|657942103|gb|AID55113.1| DNA repair and recombination protein [Cocos nucifera]
c66787_g1	185.47	125.77	124.97	97.94	53.84	102.98	68.41	68.32	56.63	gi|743767209|ref|XP_010913861.1| PREDICTED: cinnamoyl-CoA reductase 1-like [Elaeis guineensis]
c143691_g1	185.13	173.13	172.08	90.06	85.06	83.43	121.59	105.59	92.58	gi|743757729|ref|XP_010923369.1| PREDICTED: carboxymethylenebutenolidase homolog [Elaeis guineensis]
c143803_g1	185.03	177.03	177.77	30.95	15.95	13.08	20.28	18.12	18.29	gi|698493018|ref|XP_009792809.1| PREDICTED: protein LURP-one-related 8 [Nicotiana sylvestris] gi|1025201273|ref|XP_016477143.1| PREDICTED: protein LURP-one-related 8-like [Nicotiana tabacum]
c136761_g2	184.75	141.24	159.75	125.6	101.2	90.6	136.89	111.89	108.62	gi|695024453|ref|XP_009399442.1| PREDICTED: uncharacterized protein LOC103983854 isoform X1 [Musa acuminata subsp. malaccensis]
c131205_g3	184.29	176.29	185.19	129.52	114.52	112.77	153.96	165.96	172.8	gi|672133812|ref|XP_008790542.1| PREDICTED: uncharacterized protein LOC103707719 isoform X3 [Phoenix dactylifera]
c132084_g1	184.26	172.95	172.91	76.29	69.52	72.42	223.61	158.37	159.38	gi|449436277|ref|XP_004135919.1| PREDICTED: zinc finger A20 and AN1 domain-containing stress-associated protein 5 [Cucumis sativus] gi|700189913|gb|KGN45146.1| hypothetical protein Csa_7G428830 [Cucumis sativus]
c135308_g2	184.17	164.17	107.42	45.57	35.57	63.1	144.09	172.02	129.09	gi|1012364357|gb|KYP75540.1| hypothetical protein KK1_008279 [Cajanus cajan]
c125099_g1	184.17	176.17	186.57	241.47	226.47	232.26	96.01	108.01	113.21	gi|698495459|ref|XP_009793839.1| PREDICTED: 1-aminocyclopropane-1-carboxylate oxidase 5-like [Nicotiana sylvestris]
c144255_g2	184.17	164.19	159.17	42.03	6.3	7.03	35.76	27.34	29.14	gi|1035965116|gb|OAY85431.1| putative aquaporin NIP5-1 [Ananas comosus]
c144245_g1	184.04	80.81	66.38	125.63	144.62	133.63	255.05	220.05	277.62	gi|992158726|gb|KXG22050.1| hypothetical protein SORBI_009G145300 [Sorghum bicolor]
c124423_g1	183.88	300.67	302.24	77.52	85.43	85.52	196.85	161.85	166.57	gi|672183730|ref|XP_008812153.1| PREDICTED: uncharacterized protein LOC103723114 [Phoenix dactylifera]
c129116_g2	183.73	108.59	104.82	37.17	39.27	45.17	81.19	46.19	50.02	gi|694995670|ref|XP_009389843.1| PREDICTED: SUMO-conjugating enzyme SCE1 [Musa acuminata subsp. malaccensis]
c148027_g5	183.58	141.94	151.34	105.78	80.11	91.79	262.27	128.24	131.23	gi|672143156|ref|XP_008795447.1| PREDICTED: pleckstrin homology domain-containing protein 1-like [Phoenix dactylifera]
c145010_g1	182.94	170.94	174.38	106.88	101.88	98.29	172.6	156.6	157.53	gi|743800712|ref|XP_010926082.1| PREDICTED: fructose-bisphosphate aldolase 1, chloroplastic-like [Elaeis guineensis]
c127611_g1	182.59	170.59	172.9	0.82	0.98	0.77	11.76	9.26	7.98	gi|743779240|ref|XP_010920084.1| PREDICTED: pentatricopeptide repeat-containing protein At1g20230 [Elaeis guineensis]
c145670_g1	182.57	174.57	173.24	58.97	43.97	44.08	48.26	60.26	67.69	gi|743797299|ref|XP_010924947.1| PREDICTED: IAA-amino acid hydrolase ILR1-like 1 [Elaeis guineensis]
c126030_g1	182.38	174.38	161.85	105.74	90.74	108.74	126.31	138.31	150.07	gi|743759311|ref|XP_010931430.1| PREDICTED: transcription factor ILR3-like [Elaeis guineensis]
c146593_g1	182.1	156.64	157.1	70.84	37.75	35.84	108.77	83.77	80.53	gi|695061054|ref|XP_009418946.1| PREDICTED: lactoylglutathione lyase [Musa acuminata subsp. malaccensis]
c142698_g1	181.97	189.79	178.76	67.39	53.39	46.13	66.74	51.69	60.49	gi|11414898|dbj|BAB18538.1| uricase [Lotus japonicus] gi|388517671|gb|AFK46897.1| unknown [Lotus japonicus]
c148240_g4	181.79	169.79	177.96	92.85	87.85	89.09	90.04	74.04	75.31	gi|1035938499|gb|OAY65831.1| Aldehyde dehydrogenase family 2 member B7, mitochondrial [Ananas comosus]
c143703_g2	181.52	169.52	173.27	53.62	42.05	45.62	103.66	94.66	94.85	gi|1035937450|gb|OAY65237.1| Metal transporter Nramp2, partial [Ananas comosus]
c146310_g1	181.5	176.5	188.33	73.34	65.34	61.57	161.82	155.41	154.82	gi|18652196|gb|AAL77005.1| aldehyde dehydrogenase, partial [Allium cepa]
c139460_g2	181.44	150.71	163.44	26.77	21.77	24.31	55.22	37.23	37.22	gi|743755000|ref|XP_010928527.1| PREDICTED: probable choline kinase 2 [Elaeis guineensis]
c131409_g1	180.98	168.98	183.28	84.59	79.59	72.91	331.63	315.63	292.65	gi|743829323|ref|XP_011023487.1| PREDICTED: acyl carrier protein 1, chloroplastic-like isoform X1 [Populus euphratica]
c142379_g1	180.96	153.02	154.62	44.31	60.31	52.31	126.64	91.64	102.49	gi|743853074|ref|XP_010940561.1| PREDICTED: transcription elongation factor SPT5 [Elaeis guineensis]
c137454_g3	180.29	165.29	173.02	89.95	84.76	84.95	291.56	279.9	283.56	gi|731910980|gb|AIZ68171.1| 60S ribosomal protein L3 [Ornithogalum longebracteatum]
c135593_g4	179.61	167.61	165.5	104.69	99.69	94.73	150.39	134.39	133.1	gi|593330743|ref|XP_007138798.1| hypothetical protein PHAVU_009G238300g [Phaseolus vulgaris] gi|593330745|ref|XP_007138799.1| hypothetical protein PHAVU_009G238300g [Phaseolus vulgaris] gi|561011885|gb|ESW10792.1| hypothetical protein PHAVU_009G238300g [Phaseolus vulgaris] gi|561011886|gb|ESW10793.1| hypothetical protein PHAVU_009G238300g [Phaseolus vulgaris]
c133143_g3	178.7	170.7	175.22	104.28	89.28	88.23	162.44	174.44	195.45	-
c147999_g1	178.47	166.47	163.96	90.99	85.99	88.36	93.36	77.36	74.9	gi|661880357|emb|CDP15888.1| unnamed protein product [Coffea canephora]
c144042_g4	178.32	169.8	159.54	121.67	109.36	125.45	155.65	140.05	147.08	gi|695024994|ref|XP_009399730.1| PREDICTED: ubiquitin receptor RAD23d-like isoform X2 [Musa acuminata subsp. malaccensis]
c116006_g2	178.08	170.08	166.86	155.36	140.36	144.36	207.43	219.43	213.88	gi|743870447|ref|XP_010906045.1| PREDICTED: tubulin-folding cofactor A [Elaeis guineensis]
c138086_g2	177.99	163.27	152.99	101.86	60.86	66.86	258.79	233.79	232.63	gi|527206139|gb|EPS71799.1| hypothetical protein M569_02961, partial [Genlisea aurea]
c144517_g4	177.89	157.89	149.58	143	133	109.28	162.15	124.88	147.15	gi|1035959352|gb|OAY80436.1| Small ubiquitin-related modifier 2 [Ananas comosus]
c138017_g7	177.53	169.01	170.65	65.79	53.48	58.09	148.43	134.16	139.86	gi|1035952841|gb|OAY75225.1| Protein CWC A [Ananas comosus]
c141269_g3	177.45	197.96	199.55	60.45	50.63	68.45	188.81	153.81	200.01	gi|126165910|ref|YP_358662.2| RNA polymerase beta&apos;&apos; subunit [Nicotiana sylvestris] gi|126165915|ref|NP_054486.2| RNA polymerase beta&apos;&apos; subunit [Nicotiana tabacum] gi|1001824181|gb|AMM05533.1| RNA polymerase beta&apos;&apos; subunit (plastid) [Nicotiana tabacum]
c149200_g6	177.22	140.46	152.22	98.86	37.58	63.86	123.14	98.14	84.77	gi|1035959842|gb|OAY80838.1| Ribonuclease P protein subunit p25-like protein [Ananas comosus]
c143560_g1	176.59	171.59	167.83	82.15	74.15	74.93	74.06	64.26	67.06	gi|1035920364|gb|OAY49954.1| hypothetical protein MANES_05G096900 [Manihot esculenta] gi|1035920365|gb|OAY49955.1| hypothetical protein MANES_05G096900 [Manihot esculenta] gi|1035920366|gb|OAY49956.1| hypothetical protein MANES_05G096900 [Manihot esculenta]
c129514_g1	175.3	163.3	169.62	26.74	16.97	18.74	20.92	11.92	13.01	gi|695058478|ref|XP_009417556.1| PREDICTED: homeobox-leucine zipper protein HOX16-like [Musa acuminata subsp. malaccensis]
c145869_g1	175.14	163.14	163.39	159.5	154.5	152.13	324.44	308.44	313.4	gi|672122052|ref|XP_008784346.1| PREDICTED: 3-oxoacyl-[acyl-carrier-protein] synthase I, chloroplastic-like [Phoenix dactylifera]
c142824_g4	174.54	169.54	168.96	78.02	70.02	62.16	217.45	201.16	210.45	gi|641868340|gb|KDO87024.1| hypothetical protein CISIN_1g0294371mg, partial [Citrus sinensis]
c136927_g2	174.41	506.27	512.07	171.05	189.13	179.05	624.55	589.55	602.98	gi|695015790|ref|XP_009394782.1| PREDICTED: 60S ribosomal protein L10a-1-like isoform X1 [Musa acuminata subsp. malaccensis]
c126246_g1	173.63	203.9	148.63	212.04	252.96	177.04	150.23	125.23	133.85	gi|672132160|ref|XP_008789658.1| PREDICTED: plasma membrane ATPase 4-like [Phoenix dactylifera]
c140890_g9	173.42	161.42	169.78	149.09	144.09	138.76	257.88	241.88	255.03	gi|922325953|ref|XP_013442369.1| 60S ribosomal protein L37a-2 [Medicago truncatula] gi|657370216|gb|KEH16394.1| 60S ribosomal protein L37a-2 [Medicago truncatula]
c133165_g1	172.96	167.96	160.96	91.15	83.15	91.95	143.03	154.21	136.03	gi|976898554|gb|KVH87511.1| disulfide isomerase [Cynara cardunculus var. scolymus]
c145674_g3	172.9	157.9	159.13	32.67	27.66	27.67	96.7	72.63	88.7	gi|641865398|gb|KDO84083.1| hypothetical protein CISIN_1g024783mg [Citrus sinensis] gi|641865399|gb|KDO84084.1| hypothetical protein CISIN_1g024783mg [Citrus sinensis]
c134375_g1	172.88	146.05	147.88	167.9	120.08	132.9	164.9	139.9	159.85	gi|629108630|gb|KCW73776.1| hypothetical protein EUGRSUZ_E023751, partial [Eucalyptus grandis]
c145412_g6	172.82	160.82	154.23	85.68	80.68	92.89	160.72	144.72	154.18	gi|2502085|gb|AAC12797.1| adenosine triphosphatase [Vigna radiata]
c141929_g3	172.67	152.67	159.64	52.51	42.51	42.88	204.23	185.75	189.23	gi|743763668|ref|XP_010912028.1| PREDICTED: 40S ribosomal protein S10-like [Elaeis guineensis]
c145107_g1	172.45	157.45	169.47	148.19	139.4	143.19	88.25	90.67	80.25	gi|763756625|gb|KJB23956.1| hypothetical protein B456_004G125600 [Gossypium raimondii]
c136215_g1	171.97	166.97	157.02	141.45	133.45	122.38	109	99.31	102	gi|474442365|gb|EMS68433.1| hypothetical protein TRIUR3_33908 [Triticum urartu]
c143062_g7	171.77	152.73	146.77	153.38	123.57	118.38	192.81	167.81	162.04	gi|743777795|ref|XP_010919338.1| PREDICTED: uncharacterized protein LOC105043475 [Elaeis guineensis]
c149889_g1	171.74	156.74	161.1	77.29	70.52	72.29	100.28	92.99	92.28	gi|743836949|ref|XP_010936256.1| PREDICTED: FIP1[V]-like protein [Elaeis guineensis]
c147873_g3	171.29	163.29	159.77	284.99	269.99	280.77	491.32	503.32	581.13	gi|657989269|ref|XP_008386829.1| PREDICTED: tubulin alpha-3 chain-like [Malus domestica]
c136102_g5	171.15	139.67	146.15	145.48	110.22	110.48	136.14	111.14	113.77	gi|743891190|ref|XP_010911257.1| PREDICTED: bifunctional epoxide hydrolase 2-like [Elaeis guineensis]
c149945_g1	171.09	127.97	153.09	36.66	31.66	31.44	36.19	12.67	18.19	gi|743781809|ref|XP_010920984.1| PREDICTED: mitogen-activated protein kinase kinase kinase ANP1-like [Elaeis guineensis]
c148442_g1	170.79	147.26	145.79	44.42	11.97	9.42	40.31	15.31	15.96	gi|743804527|ref|XP_010927214.1| PREDICTED: putative inactive cadmium/zinc-transporting ATPase HMA3 [Elaeis guineensis]
c101808_g1	170.25	165.25	158.27	106.21	98.21	97.19	128.76	149.09	121.76	gi|947128404|gb|KRH76258.1| hypothetical protein GLYMA_01G142300 [Glycine max]
c143506_g1	170.21	148.91	152.21	38.43	33.43	30	53.65	38.11	35.65	gi|672135818|ref|XP_008791584.1| PREDICTED: phosphoenolpyruvate carboxylase kinase 2-like [Phoenix dactylifera]
c136310_g2	169.8	161.28	203.25	91.93	79.62	73.92	417.81	351.63	409.24	gi|672201152|ref|XP_008778062.1| PREDICTED: 40S ribosomal protein S14 [Phoenix dactylifera]
c141667_g2	169.62	198.98	218.45	69.15	89.31	77.15	90.24	55.24	57.1	gi|763756854|gb|KJB24185.1| hypothetical protein B456_004G131900 [Gossypium raimondii] gi|763756856|gb|KJB24187.1| hypothetical protein B456_004G131900 [Gossypium raimondii]
c143449_g5	169.58	169.12	173.33	72	82.56	80	182.66	147.66	170.47	gi|1035934883|gb|OAY63852.1| NADH dehydrogenase (ubiquinone) 1 beta subcomplex subunit 3-B [Ananas comosus]
c134764_g1	169.55	164.55	162.38	59	51	52.35	146.11	137.52	139.11	gi|672131158|ref|XP_008789135.1| PREDICTED: ran-binding protein 1 homolog b-like [Phoenix dactylifera]
c132648_g1	168.9	156.9	153.13	74.24	63.9	66.24	131.88	122.88	121.55	gi|848890153|ref|XP_012845218.1| PREDICTED: 26S proteasome non-ATPase regulatory subunit 12 homolog A-like [Erythranthe guttata] gi|604319953|gb|EYU31117.1| hypothetical protein MIMGU_mgv1a006391mg [Erythranthe guttata]
c118253_g1	168.82	124.55	134.82	32.74	23.74	22.03	87.74	119.89	101.74	gi|743756147|ref|XP_010915357.1| PREDICTED: NADP-dependent malic enzyme isoform X1 [Elaeis guineensis]
c136917_g1	168.71	141.86	143.71	168.44	129.24	133.44	191.28	166.28	166.29	gi|1035962390|gb|OAY83019.1| Multiprotein-bridging factor 1a [Ananas comosus]
c136825_g2	168.63	160.63	165.11	97.69	82.69	80.77	78.31	90.31	92.4	gi|695077167|ref|XP_009385909.1| PREDICTED: NADPH--cytochrome P450 reductase-like [Musa acuminata subsp. malaccensis]
c147075_g4	168.27	159.75	171.54	159.02	146.71	145.63	182.83	164.15	174.26	gi|731910338|gb|AIZ68137.1| vacuolar ATP synthase catalytic subunit [Ornithogalum saundersiae]
c141691_g4	167.82	159.82	170.26	86.53	71.53	65.09	257.23	269.23	270.3	-
c148011_g1	167.68	159.55	142.68	99.22	64.41	64.22	123.76	98.76	86.78	gi|695055283|ref|XP_009415812.1| PREDICTED: protein Dr1 homolog isoform X1 [Musa acuminata subsp. malaccensis]
c138710_g4	167.2	136.61	142.2	141.68	116.04	106.68	229.65	204.65	204.4	gi|695035012|ref|XP_009404974.1| PREDICTED: patellin-3-like [Musa acuminata subsp. malaccensis]
c130527_g2	166.99	135.19	132.99	74.48	65.48	73.93	191.24	192.63	205.24	gi|763786449|gb|KJB53445.1| hypothetical protein B456_009G400400 [Gossypium raimondii]
c132639_g2	166.58	158.58	168.42	90.91	75.91	89.49	234.58	246.58	239.35	gi|923826562|ref|XP_013696050.1| PREDICTED: ubiquitin-40S ribosomal protein S27a-3-like [Brassica napus]
c129761_g2	166.33	161.33	166.88	68.76	60.76	62.92	52.01	44.47	45.01	gi|743855229|ref|XP_010941298.1| PREDICTED: acyl-CoA-binding domain-containing protein 3-like isoform X2 [Elaeis guineensis]
c134350_g2	166.04	157.52	165.6	111.57	99.26	121.64	251.38	242.68	242.81	-
c138183_g2	165.56	160.56	164.85	99	91	90.62	111.14	109.12	104.14	gi|743801994|ref|XP_010926491.1| PREDICTED: vacuolar protein sorting-associated protein 4B-like [Elaeis guineensis]
c141212_g1	165.35	153.35	148.51	98.45	89.97	90.45	179.12	170.12	161.03	gi|694330443|ref|XP_009355925.1| PREDICTED: succinyl-CoA ligase [ADP-forming] subunit alpha-2, mitochondrial [Pyrus x bretschneideri]
c140663_g5	165.3	125.29	131.3	89.32	80.32	76.34	166.51	182.45	180.51	gi|702275066|ref|XP_010044222.1| PREDICTED: uncharacterized protein LOC104433237 [Eucalyptus grandis] gi|629121780|gb|KCW86270.1| hypothetical protein EUGRSUZ_B02953 [Eucalyptus grandis]
c139862_g3	165.26	156.74	163.62	96.61	84.3	82.34	101.11	97.26	92.54	gi|695068440|ref|XP_009381163.1| PREDICTED: uncharacterized protein LOC103969381 [Musa acuminata subsp. malaccensis]
c138332_g1	165.12	157.12	174.25	212.8	197.8	195.44	302.67	314.67	300.74	gi|743777500|ref|XP_010919185.1| PREDICTED: fasciclin-like arabinogalactan protein 8 [Elaeis guineensis]
c137734_g2	165.03	157.03	160.29	109	94	97.68	107.38	119.38	120.33	gi|743796934|ref|XP_010924854.1| PREDICTED: abscisic acid receptor PYL8 [Elaeis guineensis]
c143185_g3	164.97	146.07	146.97	74.26	69.26	64.81	175.1	161.71	157.1	gi|944086578|gb|KQK21930.1| hypothetical protein BRADI_1g64020 [Brachypodium distachyon]
c147130_g3	164.83	156.31	156.68	127.44	115.13	117.23	112.01	104.24	103.44	gi|743775995|ref|XP_010918392.1| PREDICTED: vacuolar protein sorting-associated protein 2 homolog 1 [Elaeis guineensis]
c124039_g3	164.65	143.24	159.43	71.66	72.52	64.25	154.43	167.17	150.29	gi|719978023|ref|XP_010249036.1| PREDICTED: protein transport protein Sec61 subunit gamma-like [Nelumbo nucifera]
c150014_g1	164.63	152.63	155.83	133.28	128.28	129.31	426.06	410.06	406.43	gi|695032144|ref|XP_009403607.1| PREDICTED: serine hydroxymethyltransferase 4 [Musa acuminata subsp. malaccensis]
c135081_g2	164.41	152.41	145.06	54	49	56.48	100.32	84.32	96.77	gi|502161436|ref|XP_004512164.1| PREDICTED: SKP1-like protein 1A [Cicer arietinum]
c145966_g1	164.07	155.55	167	82.33	70.02	75.25	267.36	243.35	258.79	gi|565468388|ref|XP_006292074.1| hypothetical protein CARUB_v10018269mg, partial [Capsella rubella] gi|482560781|gb|EOA24972.1| hypothetical protein CARUB_v10018269mg, partial [Capsella rubella]
c138645_g4	164.03	101.66	111.82	92.09	62.21	103	566.61	492.87	475.84	-
c135805_g5	163.89	263.05	280.17	68.06	80.43	76.06	126.04	91.04	87.07	gi|297741915|emb|CBI33350.3| unnamed protein product [Vitis vinifera]
c100714_g1	163.18	119.8	138.18	79.86	79.93	44.86	127.71	102.71	94.62	-
c126163_g2	162.68	211.42	205.53	151.03	142.51	159.03	400.46	365.46	356.77	gi|1028951980|ref|XP_016719390.1| PREDICTED: 60S acidic ribosomal protein P2B-like [Gossypium hirsutum] gi|1028951982|ref|XP_016719391.1| PREDICTED: 60S acidic ribosomal protein P2B-like [Gossypium hirsutum]
c135151_g2	162.43	119.26	137.43	135.31	78.6	100.31	134.31	109.31	120.87	gi|672178560|ref|XP_008809414.1| PREDICTED: uncharacterized protein LOC103721127 [Phoenix dactylifera]
c140883_g1	162.4	139.36	137.4	86.89	50.64	51.89	167.42	142.42	149.13	gi|672142917|ref|XP_008795323.1| PREDICTED: serine/arginine-rich splicing factor SR45-like, partial [Phoenix dactylifera]
c138289_g1	162.06	116.26	117.1	143.21	106.12	112.28	169.94	131.46	129.79	gi|1035937984|gb|OAY65537.1| putative quinone-oxidoreductase, chloroplastic [Ananas comosus]
c145857_g1	161.97	149.97	151.9	73.01	70.92	65.01	149.7	140.7	141.52	gi|731438607|ref|XP_010647468.1| PREDICTED: LOW QUALITY PROTEIN: hsp70-Hsp90 organizing protein 3-like [Vitis vinifera]
c148316_g3	161.87	156.87	160.98	23.4	15.4	12.45	42.8	35.37	35.8	gi|743756527|ref|XP_010917281.1| PREDICTED: LOW QUALITY PROTEIN: probable glutamate carboxypeptidase 2 [Elaeis guineensis]
c142060_g2	161.85	149.85	168.29	77.68	72.68	68.38	56.25	40.25	38	gi|225217003|gb|ACN85291.1| unknown, partial [Oryza coarctata]
c143053_g2	161.81	149.81	158.51	78.21	77.93	70.21	121.46	112.46	107.11	gi|743829215|ref|XP_010934086.1| PREDICTED: synaptotagmin-4-like isoform X1 [Elaeis guineensis]
c247715_g1	161.53	153.53	124.04	29.5	14.5	16.97	49.84	61.84	57.13	-
c126969_g1	161.47	146.47	149.36	58.53	56.17	53.53	43.01	32.56	35.01	gi|901826773|gb|KMZ76107.1| hypothetical protein ZOSMA_106G00120 [Zostera marina]
c143406_g2	160.6	145.6	154.44	142.4	138.85	137.4	190.64	187.22	182.64	gi|743799887|ref|XP_010925645.1| PREDICTED: 14-3-3 protein 9 isoform X1 [Elaeis guineensis]
c141052_g1	160.53	141.08	135.53	80.47	44.87	45.47	166.87	141.87	152.45	-
c147341_g5	160.16	152.16	130.63	231.83	216.83	198.85	223.14	235.14	232.78	gi|356600095|gb|AET22400.1| vacuolar H+-pyrophosphatase, partial [Citrus sinensis]
c138868_g2	160.14	118.62	138.14	71.41	55.73	59.41	114.09	122.91	124.09	gi|729459743|ref|XP_010525152.1| PREDICTED: 14-3-3-like protein [Tarenaya hassleriana] gi|729459746|ref|XP_010525153.1| PREDICTED: 14-3-3-like protein [Tarenaya hassleriana] gi|729459749|ref|XP_010525154.1| PREDICTED: 14-3-3-like protein [Tarenaya hassleriana] gi|90657659|gb|ABD96957.1| hypothetical protein [Tarenaya spinosa]
c150879_g2	160	145	164.12	385.66	407.85	380.66	315.15	304.97	307.15	gi|672198644|ref|XP_008777388.1| PREDICTED: putative disease resistance RPP13-like protein 1 [Phoenix dactylifera]
c132069_g2	159.54	112.38	125.54	10.33	1.33	2.09	3.21	2.72	2.31	gi|672135818|ref|XP_008791584.1| PREDICTED: phosphoenolpyruvate carboxylase kinase 2-like [Phoenix dactylifera]
c126784_g1	159.1	151.1	152.24	143.85	128.85	124.7	394.55	406.55	446.92	gi|566254203|ref|XP_006387416.1| hypothetical protein POPTR_1064s00200g [Populus trichocarpa] gi|550307019|gb|ERP46330.1| hypothetical protein POPTR_1064s00200g [Populus trichocarpa]
c142920_g2	158.47	153.47	160.91	49.92	41.92	39.64	112.35	101.65	105.35	gi|695010311|ref|XP_009391825.1| PREDICTED: uncharacterized protein LOC103977897 [Musa acuminata subsp. malaccensis]
c145215_g2	158.45	129.7	133.45	86.39	51.79	51.39	129.57	104.57	100.88	gi|743782400|ref|XP_010921133.1| PREDICTED: O-acetyl-ADP-ribose deacetylase MACROD2-like isoform X2 [Elaeis guineensis]
c127180_g1	158.43	146.43	155.27	127.54	122.54	121.11	228.19	212.19	205.41	gi|449464842|ref|XP_004150138.1| PREDICTED: NADH dehydrogenase [ubiquinone] 1 beta subcomplex subunit 9 [Cucumis sativus] gi|700206735|gb|KGN61854.1| hypothetical protein Csa_2G252030 [Cucumis sativus]
c288382_g1	158.42	120.99	135.79	71.33	57.43	63.7	188.47	186.55	131.33	gi|695034298|ref|XP_009404653.1| PREDICTED: 60S ribosomal protein L13a-4-like [Musa acuminata subsp. malaccensis]
c135997_g1	158.04	149.52	155	217	204.69	197.38	99.41	94.53	90.84	gi|695018533|ref|XP_009396235.1| PREDICTED: plasma membrane ATPase [Musa acuminata subsp. malaccensis]
c138300_g1	157.98	231.48	244.1	157.04	167.52	165.04	404.52	369.52	367.67	gi|743942840|ref|XP_011015920.1| PREDICTED: 60S ribosomal protein L9-like [Populus euphratica]
c133446_g3	157.87	148.19	139.87	84.27	79.27	81.31	163.4	142.68	145.4	-
c139610_g1	157.43	150.87	152.21	91.78	88.13	84.37	117.73	113.63	113.59	gi|672116670|ref|XP_008781505.1| PREDICTED: serine/threonine-protein kinase SAPK7 [Phoenix dactylifera]
c128519_g1	157.28	122.99	123.28	97.16	88.16	98.91	162.92	171.44	176.92	gi|1002860985|ref|XP_015694362.1| PREDICTED: uncharacterized protein At5g39570 isoform X2 [Oryza brachyantha]
c148500_g4	156.77	132.93	131.77	112.59	68.11	77.59	144.54	119.54	93.4	gi|1035957178|gb|OAY78630.1| DNA-damage-repair/toleration protein [Ananas comosus]
c136678_g1	156.7	151.7	152.34	108.51	100.51	96.09	121.06	119.43	114.06	gi|720014057|ref|XP_010260377.1| PREDICTED: 28 kDa heat- and acid-stable phosphoprotein-like [Nelumbo nucifera]
c145980_g3	156.36	148.36	156.31	92.37	77.37	80.04	176.68	188.68	179.56	gi|743859928|ref|XP_010942879.1| PREDICTED: heterogeneous nuclear ribonucleoprotein 1-like [Elaeis guineensis]
c147404_g1	156.23	144.23	150.96	99.43	94.43	86.43	128.89	112.89	118.95	gi|743804711|ref|XP_010927259.1| PREDICTED: serrate RNA effector molecule-like isoform X2 [Elaeis guineensis]
c148779_g1	155.86	140.86	130.8	102.36	97.1	97.36	142.41	131.28	134.41	gi|672161583|ref|XP_008800614.1| PREDICTED: OBERON-like protein isoform X1 [Phoenix dactylifera]
c145000_g1	155.41	150.41	153.47	101.36	93.36	103.09	268.17	266.33	261.17	-
c145151_g3	155.31	147.31	146.66	124.3	109.3	103.57	126.39	138.39	131.5	gi|848916849|ref|XP_012855935.1| PREDICTED: cytochrome b-c1 complex subunit 7 [Erythranthe guttata] gi|604302371|gb|EYU21947.1| hypothetical protein MIMGU_mgv1a016385mg [Erythranthe guttata]
c150331_g2	155.29	152.06	150.07	162.58	164.2	155.17	54.57	55.44	50.43	gi|743755000|ref|XP_010928527.1| PREDICTED: probable choline kinase 2 [Elaeis guineensis]
c127585_g1	154.99	135.01	129.99	172.52	132.66	137.52	174.97	149.97	159.17	gi|695078145|ref|XP_009386450.1| PREDICTED: probable cellulose synthase A catalytic subunit 8 [UDP-forming] [Musa acuminata subsp. malaccensis] gi|695078147|ref|XP_009386451.1| PREDICTED: probable cellulose synthase A catalytic subunit 8 [UDP-forming] [Musa acuminata subsp. malaccensis]
c143300_g2	154.98	139.98	142.91	86.51	84.46	81.51	164.98	149.79	156.98	gi|672108452|ref|XP_008785218.1| PREDICTED: peptidyl-prolyl cis-trans isomerase CYP95-like isoform X2 [Phoenix dactylifera]
c119536_g1	154.94	149.94	156.94	279.12	271.12	253.62	287.26	281.23	280.26	gi|6319128|gb|AAF07174.1| H+-pyrophosphatase [Vitis vinifera]
c94083_g1	154.92	115.27	129.92	200.54	201.03	165.54	264.19	239.19	228.11	gi|1035898808|gb|OAY28409.1| hypothetical protein MANES_15G064200 [Manihot esculenta]
c143765_g2	154.89	146.89	145.33	15.44	0.44	0.33	32.78	44.78	46.79	gi|1035959156|gb|OAY80285.1| Senescence-specific cysteine protease SAG39 [Ananas comosus]
c146661_g3	154.85	139.85	139.89	80.52	73.13	75.52	137.31	125.03	129.31	gi|695058261|ref|XP_009417439.1| PREDICTED: proteasome subunit beta type-3 [Musa acuminata subsp. malaccensis]
c258170_g1	154.67	67.71	132.67	39.61	37.79	27.61	55.23	60.36	65.23	-
c148977_g3	154.42	146.42	169.86	64.35	49.35	55.4	29.15	41.15	32.32	gi|743893317|ref|XP_010911773.1| PREDICTED: phosphoenolpyruvate carboxylase 2, partial [Elaeis guineensis]
c123468_g2	153.65	126.94	135.65	0.55	0.41	0.8	18.95	0.84	0.95	gi|1035919464|gb|OAY49054.1| hypothetical protein MANES_05G025800 [Manihot esculenta]
c146487_g2	153.25	128.9	128.25	91.88	65.7	56.88	203.01	178.01	199.17	-
c134095_g1	152.87	147.87	151	112.03	104.03	99.37	149.95	131.79	142.95	gi|743781318|ref|XP_010920856.1| PREDICTED: PHD finger protein ALFIN-LIKE 2 isoform X3 [Elaeis guineensis]
c134297_g1	152.75	137.56	134.75	77.98	72.98	77.72	139.4	124.45	121.4	gi|672114025|ref|XP_008775037.1| PREDICTED: uncharacterized protein LOC103695473 [Phoenix dactylifera]
c148130_g3	152.51	105.69	118.51	67.8	58.8	44.16	64.47	70.19	78.47	-
c106286_g1	152.5	128.69	145.42	22.21	22.39	18.31	60.11	59.04	70.15	gi|1035965546|gb|OAY85809.1| putative sugar kinase [Ananas comosus]
c141234_g7	152.32	125.43	130.32	54.76	44.23	42.76	79.87	87.23	89.87	gi|659128275|ref|XP_008464130.1| PREDICTED: CAX-interacting protein 4 [Cucumis melo]
c138841_g2	152.27	143.75	151.01	85.83	73.52	82.23	118.44	111.92	109.87	gi|728819706|gb|KHG03339.1| 54S ribosomal L37, mitochondrial [Gossypium arboreum]
c119463_g1	152.21	137.21	138.24	68.75	58.9	63.75	18.64	12.46	14.67	gi|2150134|gb|AAB71136.1| acid invertase [Asparagus officinalis]
c134494_g1	151.98	143.98	146.14	214.49	199.49	198.34	456	468	433.78	gi|3559803|emb|CAA06839.1| invertase [Allium cepa]
c122753_g3	151.92	131.92	128.12	63.02	53.02	46.39	127.46	112.17	112.46	gi|567875231|ref|XP_006430205.1| hypothetical protein CICLE_v10013189mg [Citrus clementina] gi|557532262|gb|ESR43445.1| hypothetical protein CICLE_v10013189mg [Citrus clementina]
c94097_g1	151.62	128.73	126.62	154.36	112.53	119.36	238.67	213.67	212.44	gi|743785490|ref|XP_010921920.1| PREDICTED: protein EARLY RESPONSIVE TO DEHYDRATION 15 [Elaeis guineensis] gi|743785494|ref|XP_010921921.1| PREDICTED: protein EARLY RESPONSIVE TO DEHYDRATION 15 [Elaeis guineensis]
c140847_g1	151.34	140.23	148.13	1871.6	1857.6	1832.67	105.91	104.87	99.66	gi|509544186|gb|AGN30962.1| chromoplast-specific carotenoid-associated protein [Narcissus tazetta var. chinensis]
c138776_g6	151.18	117.21	117.18	59.29	50.29	36.52	138.89	129.96	152.89	gi|694368410|ref|XP_009362429.1| PREDICTED: patellin-3-like [Pyrus x bretschneideri]
c141194_g1	151.18	139.18	139.7	56.87	51.77	48.87	55.45	46.45	49.43	gi|514074429|gb|AGO33166.1| MYB transcription factor [Narcissus tazetta var. chinensis]
c138100_g1	151.06	146.06	156.58	64.48	56.48	57.74	259.22	228.59	252.22	-
c114707_g1	150.72	128.51	125.72	96.18	54.34	61.18	195.71	170.71	164.69	gi|297737051|emb|CBI26252.3| unnamed protein product [Vitis vinifera]
c146350_g3	150.7	138.7	141.1	64.24	59.88	56.24	98.34	89.34	92.19	gi|719985942|ref|XP_010251551.1| PREDICTED: V-type proton ATPase subunit E [Nelumbo nucifera]
c129724_g1	150.66	130.66	141.51	68.97	58.97	65.44	163.58	154.33	148.58	-
c135851_g1	150.39	124.57	122.88	73.95	72.37	75.21	143.36	128.36	125.41	gi|672166601|ref|XP_008803231.1| PREDICTED: uncharacterized protein LOC103716832 [Phoenix dactylifera]
c119668_g2	150.36	113.26	123.76	99.12	92.66	82.91	141.95	128.58	121.09	gi|695035012|ref|XP_009404974.1| PREDICTED: patellin-3-like [Musa acuminata subsp. malaccensis]
c144377_g5	149.7	129.7	118.54	191.16	181.16	141.51	109.32	95.01	94.32	-
c140036_g2	149.42	137.42	140.99	63.85	62.45	55.85	81.03	72.03	70.4	gi|743876495|ref|XP_010907596.1| PREDICTED: uncharacterized protein LOC105034232 [Elaeis guineensis]
c134547_g2	149.37	117.04	124.37	95.33	63.85	60.33	128.14	103.14	112.39	gi|743830371|ref|XP_010934405.1| PREDICTED: histone deacetylase complex subunit SAP18 [Elaeis guineensis]
c125980_g1	149.17	137.17	143.28	115.51	110.51	107.71	174.42	158.42	147.22	gi|720077420|ref|XP_010241031.1| PREDICTED: probable histone H2A.3 [Nelumbo nucifera]
c147153_g3	149.01	111.22	115.01	67.44	58.44	56.36	497.22	521.73	511.22	gi|1012347274|gb|KYP58465.1| Histone H3.2, partial [Cajanus cajan]
c142260_g3	148.79	140.79	159.39	75.98	60.98	65.32	230.93	242.93	229.64	-
c150590_g4	148.63	151.79	143.41	413.26	401.51	405.85	342.33	340.4	338.19	gi|672135702|ref|XP_008791524.1| PREDICTED: chorismate synthase, chloroplastic-like [Phoenix dactylifera]
c134168_g3	148.03	130.81	123.03	102.87	63.01	67.87	107.14	82.14	78.59	-
c131961_g1	147.95	122.25	113.95	98.09	89.09	84.29	95.33	111.22	109.33	gi|848873007|ref|XP_012837063.1| PREDICTED: uncharacterized protein LOC105957662 [Erythranthe guttata] gi|604333455|gb|EYU37806.1| hypothetical protein MIMGU_mgv1a014926mg [Erythranthe guttata]
c134269_g1	147.93	139.93	146.82	19.34	4.34	4.96	25.68	21.39	20.12	gi|1035935050|gb|OAY64007.1| Cytochrome P450 71A9 [Ananas comosus]
c133181_g1	147.73	132.73	133.67	235.76	216.47	230.76	110.93	111.63	102.93	gi|743813426|ref|XP_010929714.1| PREDICTED: uncharacterized protein LOC105051113 [Elaeis guineensis]
c133190_g1	147.67	139.67	152.21	89.82	74.82	85.44	128.24	140.24	135.63	gi|548862621|gb|ERN19979.1| hypothetical protein AMTR_s00071p00140730 [Amborella trichopoda]
c106271_g1	147.65	101.96	124.47	45.04	51.12	42.02	255.92	152.01	189.8	gi|672170112|ref|XP_008805106.1| PREDICTED: 40S ribosomal protein S19-2-like [Phoenix dactylifera]
c116912_g1	147.42	141.54	122.42	117.41	92.09	82.41	231.08	206.08	171.72	gi|947071351|gb|KRH20242.1| hypothetical protein GLYMA_13G165200 [Glycine max]
c138161_g1	146.9	131.9	138.12	14.28	9.51	9.28	28.38	19.38	20.38	gi|1002861830|ref|XP_006657773.2| PREDICTED: septum-promoting GTP-binding protein 1 [Oryza brachyantha]
c146208_g1	146.88	131.88	137.89	77.48	71.09	72.48	100.94	96.72	92.94	gi|1035936423|gb|OAY64754.1| Aspartic proteinase Asp1 [Ananas comosus]
c132246_g1	146.64	131.64	125.16	50.23	46.8	45.23	136.63	129.6	128.63	gi|672132231|ref|XP_008789695.1| PREDICTED: ras GTPase-activating protein-binding protein 1-like [Phoenix dactylifera]
c147914_g1	146.39	134.39	141.72	116.49	111.49	109.93	303.77	287.77	275.82	gi|922505043|ref|XP_013589557.1| PREDICTED: uncharacterized protein LOC106297989 [Brassica oleracea var. oleracea]
c137017_g1	145.92	130.92	134.05	74.63	63.21	69.63	120.1	106.11	112.1	gi|672115707|ref|XP_008780998.1| PREDICTED: 26S proteasome non-ATPase regulatory subunit 4 homolog [Phoenix dactylifera]
c137235_g4	145.4	140.4	149.81	66.5	58.5	59.24	84.56	81.67	77.56	gi|743857572|ref|XP_010942151.1| PREDICTED: zyxin [Elaeis guineensis]
c116947_g1	144.49	108.73	126.49	31.88	26.88	28.72	107.13	89.38	89.13	gi|118481900|gb|ABK92885.1| unknown [Populus trichocarpa]
c148516_g1	144.4	129.4	139.89	53.07	44.39	48.07	157.06	151.4	149.06	gi|743821703|ref|XP_010932105.1| PREDICTED: putative lysozyme-like protein [Elaeis guineensis]
c139025_g1	144.24	132.24	135.6	36.35	27.46	28.35	96.17	87.17	83.05	gi|695014602|ref|XP_009394133.1| PREDICTED: protein trichome birefringence-like 38 [Musa acuminata subsp. malaccensis]
c129469_g1	143.84	136.04	125.84	67.83	62.83	62.36	207.8	187.73	189.8	gi|567878893|ref|XP_006432005.1| hypothetical protein CICLE_v10002735mg [Citrus clementina] gi|557534127|gb|ESR45245.1| hypothetical protein CICLE_v10002735mg [Citrus clementina]
c140129_g4	143.21	148.45	148.92	65.12	63.76	62.97	92.98	99.77	108.76	gi|743774615|ref|XP_010917667.1| PREDICTED: serine/threonine-protein phosphatase 4 regulatory subunit 2-B isoform X1 [Elaeis guineensis]
c189331_g1	143.18	105.76	157.48	21.99	25.81	42	182.63	132.05	104.88	-
c98686_g3	143.06	170.36	158.36	34.96	39.36	24.84	67.27	49.36	80.51	-
c138096_g3	142.4	118.79	117.4	79.87	38.17	44.87	165.63	140.63	151.11	gi|695032041|ref|XP_009403552.1| PREDICTED: nuclear transport factor 2 [Musa acuminata subsp. malaccensis]
c150417_g2	142.31	135.81	137.09	58.39	56.83	50.98	113.99	101.26	109.85	gi|719972255|ref|XP_010277017.1| PREDICTED: FAM10 family protein At4g22670-like [Nelumbo nucifera] gi|719972258|ref|XP_010277023.1| PREDICTED: FAM10 family protein At4g22670-like [Nelumbo nucifera] gi|719972261|ref|XP_010277030.1| PREDICTED: FAM10 family protein At4g22670-like [Nelumbo nucifera] gi|719972266|ref|XP_010277042.1| PREDICTED: FAM10 family protein At4g22670-like [Nelumbo nucifera]
c139395_g2	142.24	130.24	123.47	76.64	71.64	88.01	154.89	138.89	141.55	gi|720073740|ref|XP_010278803.1| PREDICTED: acyl-CoA-binding protein-like [Nelumbo nucifera]
c147377_g7	142.16	130.16	134.44	40.27	35.27	32.77	36.57	20.57	17.56	gi|672125450|ref|XP_008786143.1| PREDICTED: remorin-like [Phoenix dactylifera]
c132851_g1	141.67	133.67	139.33	95.46	80.46	76.84	169.7	181.7	187.9	gi|743883156|ref|XP_010909337.1| PREDICTED: ras-related protein RABA5e-like [Elaeis guineensis]
c137618_g2	141.24	129.24	119.78	33.39	24.65	25.39	99.19	90.19	83.33	gi|743758283|ref|XP_010926002.1| PREDICTED: tubby-like F-box protein 5 [Elaeis guineensis]
c138898_g2	140.81	132.29	121.58	172	159.69	156.53	86.19	85.04	77.62	gi|743838541|ref|XP_010936731.1| PREDICTED: peroxisomal membrane protein PEX14-like [Elaeis guineensis]
c75369_g1	139.83	142.82	117.83	112.91	78.36	100.91	70.97	101.84	80.97	-
c133953_g3	139.83	114.12	114.83	92.75	60.94	57.75	86.47	61.47	64.14	gi|743821878|ref|XP_010932150.1| PREDICTED: thioredoxin reductase NTRB [Elaeis guineensis]
c147015_g1	139.34	139.42	140.3	68.54	80.19	79.36	81.41	74.69	72.01	gi|743875428|ref|XP_010907335.1| PREDICTED: ferredoxin--NADP reductase, root isozyme, chloroplastic-like isoform X1 [Elaeis guineensis]
c132099_g1	139.17	58.7	61.67	9.07	5.16	3.94	63.09	25.71	26.27	gi|672116457|ref|XP_008781394.1| PREDICTED: vacuolar iron transporter homolog 4-like [Phoenix dactylifera]
c144887_g2	139.14	129.73	133.92	78.88	73.2	71.47	81.25	78.67	77.11	gi|672155557|ref|XP_008797756.1| PREDICTED: uncharacterized protein LOC103712852 [Phoenix dactylifera]
c149529_g4	139.11	136.88	148.38	77.67	96.92	94.87	116.64	119.35	115.27	gi|743759311|ref|XP_010931430.1| PREDICTED: transcription factor ILR3-like [Elaeis guineensis]
c148259_g6	138.95	127.1	133.73	141.66	141.49	134.25	217.45	213.86	213.31	gi|242053811|ref|XP_002456051.1| hypothetical protein SORBIDRAFT_03g029570 [Sorghum bicolor]
c137923_g2	138.93	113.73	113.58	89.62	92.02	82.43	169.61	143.99	150.6	gi|1035957741|gb|OAY79094.1| Serine/arginine-rich SC35-like splicing factor SCL30 [Ananas comosus]
c145059_g2	138.85	95.53	104.85	80.49	71.49	82.95	534.63	592.42	548.63	gi|944048562|gb|KQJ84203.1| hypothetical protein BRADI_5g19360 [Brachypodium distachyon]
c148972_g2	138.78	135.13	154.58	56.04	65.92	64.04	104.29	69.29	74.42	gi|743882674|ref|XP_010909216.1| PREDICTED: UPF0664 stress-induced protein C29B12.11c-like [Elaeis guineensis]
c127221_g4	138.69	126.69	123.85	99.16	94.16	81.4	206.15	190.15	188.6	gi|743799501|ref|XP_010925494.1| PREDICTED: protein argonaute 2-like [Elaeis guineensis]
c142497_g1	138.51	123.51	128.68	115.39	108.19	110.39	97.92	95	89.92	gi|743873234|ref|XP_010906765.1| PREDICTED: adenylosuccinate synthetase, chloroplastic-like [Elaeis guineensis]
c145983_g1	138.15	126.15	133.23	72.25	63.8	64.25	94.91	85.91	81.29	gi|802778894|ref|XP_012091265.1| PREDICTED: tropinone reductase-like 3 [Jatropha curcas] gi|643703619|gb|KDP20683.1| hypothetical protein JCGZ_21154 [Jatropha curcas]
c146214_g5	137.55	129.55	137.17	125.41	110.41	108.54	139.66	151.66	153.47	gi|719993010|ref|XP_010253754.1| PREDICTED: calcium-dependent protein kinase 13 [Nelumbo nucifera]
c149910_g1	137.33	132.33	139.08	201.92	193.92	192.32	244.96	232.98	237.96	gi|743781529|ref|XP_010920914.1| PREDICTED: protein IQ-DOMAIN 1-like [Elaeis guineensis] gi|743781532|ref|XP_010920916.1| PREDICTED: protein IQ-DOMAIN 1-like [Elaeis guineensis] gi|743781536|ref|XP_010920917.1| PREDICTED: protein IQ-DOMAIN 1-like [Elaeis guineensis]
c139978_g7	137.16	125.16	134.98	72.64	60.28	64.64	84.5	75.5	78.47	gi|1009155212|ref|XP_015895591.1| PREDICTED: uncharacterized protein LOC107429425 [Ziziphus jujuba]
c143085_g2	136.99	131.99	129.3	143.79	135.79	135.29	40.01	34.59	33.01	gi|672142749|ref|XP_008795238.1| PREDICTED: GDP-L-galactose phosphorylase 1-like [Phoenix dactylifera]
c127631_g1	136.49	124.49	135.73	1.58	0.58	1.5	1.53	1.93	2.25	gi|743777652|ref|XP_010919262.1| PREDICTED: CEN-like protein 1 [Elaeis guineensis]
c142035_g1	136.42	133.97	131.2	54.94	46.57	47.53	104.08	99.95	99.94	gi|1035948776|gb|OAY72472.1| DEAD-box ATP-dependent RNA helicase 21 [Ananas comosus]
c147022_g3	136.29	61.09	111.29	79.89	94.45	44.89	122.03	97.03	108.55	-
c299913_g1	136.04	167.28	118.04	114.46	109.46	37.4	122.17	67.29	104.17	gi|292385872|gb|ADE22251.1| eukaryotic translation initiation factor small subunit [Zea mays]
c146398_g5	135.96	109.81	117.96	70.44	65.44	55.11	309.9	288.46	291.9	gi|695021621|ref|XP_009397905.1| PREDICTED: 60S ribosomal protein L37-3-like [Musa acuminata subsp. malaccensis]
c147981_g1	135.55	127.55	132.57	146.18	131.18	136.52	106.54	118.54	127.15	gi|719988882|ref|XP_010252480.1| PREDICTED: proline synthase co-transcribed bacterial homolog protein-like [Nelumbo nucifera]
c144939_g4	135.35	127.35	116.95	122.44	107.44	88.59	137.4	149.4	170.16	gi|658002516|ref|XP_008393751.1| PREDICTED: uncharacterized protein At2g23090-like [Malus domestica] gi|658058582|ref|XP_008365103.1| PREDICTED: uncharacterized protein At2g23090-like [Malus domestica]
c149444_g1	135.34	134.45	130.12	87.8	89.17	80.39	155.44	144.65	151.3	gi|672112885|ref|XP_008808113.1| PREDICTED: heterogeneous nuclear ribonucleoprotein Q-like isoform X1 [Phoenix dactylifera] gi|672112887|ref|XP_008808122.1| PREDICTED: heterogeneous nuclear ribonucleoprotein Q-like isoform X1 [Phoenix dactylifera] gi|672112889|ref|XP_008808129.1| PREDICTED: heterogeneous nuclear ribonucleoprotein Q-like isoform X1 [Phoenix dactylifera]
c140634_g2	135.11	220.63	230.88	112.65	127.61	120.65	233.69	198.69	198.31	gi|719996759|ref|XP_010254879.1| PREDICTED: U1 small nuclear ribonucleoprotein 70 kDa-like [Nelumbo nucifera]
c144663_g1	135	80.8	85.58	134.49	87.41	86.67	121.31	71.78	76.44	gi|478427917|gb|AGI97941.1| p-coumarate 3-hydroxylase [Narcissus tazetta]
c134898_g1	134.86	36.95	34.58	107.05	32.97	36.05	170.56	64.86	52.56	gi|590593490|ref|XP_007017581.1| 20S proteasome alpha subunit F2 [Theobroma cacao] gi|508722909|gb|EOY14806.1| 20S proteasome alpha subunit F2 [Theobroma cacao]
c134271_g5	134.79	71.12	80.02	54.46	27.37	28.85	111.23	65.18	61.41	gi|694995569|ref|XP_009389345.1| PREDICTED: mitochondrial import inner membrane translocase subunit TIM23-1-like [Musa acuminata subsp. malaccensis]
c146100_g6	134.77	45.15	58.47	53.97	24.8	23.19	325	178.49	152.46	gi|195617694|gb|ACG30677.1| histone H4 [Zea mays]
c143173_g2	134.66	126.66	133.87	158.27	143.27	150.01	91.68	103.68	96.33	-
c139846_g3	134.64	122.64	128.7	31.17	26.17	120.91	191.46	175.46	145.57	gi|694413910|ref|XP_009335198.1| PREDICTED: malate dehydrogenase, mitochondrial [Pyrus x bretschneideri]
c145153_g3	134.56	129.56	129.53	298	290	290.74	323.37	311.36	316.37	gi|567859858|ref|XP_006422583.1| hypothetical protein CICLE_v10029003mg [Citrus clementina] gi|557524517|gb|ESR35823.1| hypothetical protein CICLE_v10029003mg [Citrus clementina] gi|641849217|gb|KDO68092.1| hypothetical protein CISIN_1g023370mg [Citrus sinensis]
c143567_g1	134.48	110.05	86.24	73.08	56.75	48.2	168.7	109.83	108.45	gi|743892255|ref|XP_010911506.1| PREDICTED: protein FLX-like 2, partial [Elaeis guineensis]
c144027_g1	134.46	125.94	123.74	49.56	37.25	48.13	86.89	84.63	78.32	-
c125571_g1	134.44	105.43	112.44	37.79	14.93	25.79	110.26	99.91	120.26	-
c277884_g1	134.44	10.85	36.29	91.74	12.69	28.15	176.46	32.86	23.24	gi|743776234|ref|XP_010918518.1| PREDICTED: membrane steroid-binding protein 2 [Elaeis guineensis]
c138798_g2	134.29	60.57	53.34	48.09	21.8	23.04	61.74	29.57	30.97	gi|1012243132|ref|XP_015941437.1| PREDICTED: cysteine-rich PDZ-binding protein [Arachis duranensis] gi|1021568487|ref|XP_016175467.1| PREDICTED: cysteine-rich PDZ-binding protein [Arachis ipaensis]
c20738_g1	133.94	111.78	111.07	35.91	21.15	26	95.5	85.84	86.8	gi|672183730|ref|XP_008812153.1| PREDICTED: uncharacterized protein LOC103723114 [Phoenix dactylifera]
c146146_g3	133.92	63.31	58.22	91.86	42	46.98	99.1	40.39	42.04	gi|743776405|ref|XP_010918609.1| PREDICTED: arsenate reductase 2.2 [Elaeis guineensis]
c150487_g1	133.91	121.91	125.38	67.7	62.7	56.78	88.85	72.85	85.67	-
c149389_g4	133.88	87.7	94.82	8.13	0.12	0.86	19.22	6.15	6.08	gi|743780443|ref|XP_010920510.1| PREDICTED: probable transcriptional regulator RABBIT EARS [Elaeis guineensis]
c123374_g1	133.83	51.18	56.61	162.35	75.87	77.41	861.41	370.87	372.5	gi|901823778|gb|KMZ74938.1| Nucleotide-diphospho-sugar transferases superfamily protein [Zostera marina]
c132973_g1	133.69	51.45	70.6	64.85	23.73	16.21	85.41	41.52	31.12	gi|695006151|ref|XP_009389554.1| PREDICTED: metacaspase-1-like [Musa acuminata subsp. malaccensis]
c121577_g1	133.62	118.62	122.87	34.77	32.33	29.77	130.25	118.77	122.25	gi|763755386|gb|KJB22717.1| hypothetical protein B456_004G062400 [Gossypium raimondii] gi|763755387|gb|KJB22718.1| hypothetical protein B456_004G062400 [Gossypium raimondii]
c144077_g3	133.6	68.63	69.76	67.17	32.68	36.86	177.06	95.82	91.46	gi|743844465|ref|XP_010938353.1| PREDICTED: 60S ribosomal protein L19-3 [Elaeis guineensis]
c92379_g1	133.57	70.07	65.68	139.1	46.61	49.64	211.09	82.04	85.35	gi|743881856|ref|XP_010909011.1| PREDICTED: chloride conductance regulatory protein ICln [Elaeis guineensis] gi|743881860|ref|XP_010909012.1| PREDICTED: chloride conductance regulatory protein ICln [Elaeis guineensis] gi|743881864|ref|XP_010909013.1| PREDICTED: chloride conductance regulatory protein ICln [Elaeis guineensis]
c133921_g2	133.54	80.93	89.44	41.25	17.63	22.42	104.06	66.46	67.82	gi|672184844|ref|XP_008812669.1| PREDICTED: DNA-directed RNA polymerases II, IV and V subunit 12 [Phoenix dactylifera]
c143342_g1	133.52	128.52	130.92	114.18	106.18	108.91	163.34	157.91	156.34	gi|743869136|ref|XP_010905740.1| PREDICTED: uncharacterized protein LOC105032859 [Elaeis guineensis]
c285155_g1	133.46	55.35	54.35	3.84	0.98	1.62	108.85	47.02	54.23	gi|695074257|ref|XP_009384323.1| PREDICTED: non-specific lipid-transfer protein-like [Musa acuminata subsp. malaccensis]
c148354_g2	133.41	151.98	151.27	86.62	124.74	121.59	123.17	132.71	135.97	gi|695009459|ref|XP_009391366.1| PREDICTED: alpha carbonic anhydrase 7-like [Musa acuminata subsp. malaccensis]
c54692_g1	133.21	19.88	9.74	53.59	3.91	2.96	105.71	12.21	16.33	-
c148452_g3	133.15	50.2	59.25	343.45	196.73	194.71	417	246.45	241.78	gi|99033683|gb|ABF61863.1| chaperone [Agave tequilana]
c150218_g1	133.12	128.12	129.11	102.13	94.13	89.77	107.43	101.23	100.43	gi|1035949313|gb|OAY72861.1| Serine/threonine-protein phosphatase [Ananas comosus]
c150013_g2	133.06	52.05	56.94	183.06	74.81	70.56	249.23	100.7	109.89	gi|743775538|ref|XP_010918151.1| PREDICTED: 24-methylenesterol C-methyltransferase 2 [Elaeis guineensis]
c129522_g1	133.05	80.11	82.43	25.29	20.35	17.19	74.63	43.97	46.15	gi|470108589|ref|XP_004290595.1| PREDICTED: caffeoyl-CoA O-methyltransferase [Fragaria vesca subsp. vesca]
c142446_g2	133.03	57.15	68.59	105.87	36.85	54.29	223.33	107.2	100.88	gi|694422534|ref|XP_009339096.1| PREDICTED: protein Asterix-like [Pyrus x bretschneideri] gi|694422536|ref|XP_009339097.1| PREDICTED: protein Asterix-like [Pyrus x bretschneideri]
c143967_g4	132.91	138.54	145.14	24.33	23.97	25.42	102.32	111.93	112.76	gi|743779494|ref|XP_010920217.1| PREDICTED: transcription initiation factor IIB [Elaeis guineensis]
c145245_g5	132.87	127.87	132.95	28.85	20.85	25.77	14.46	7.7	7.46	gi|672134880|ref|XP_008791094.1| PREDICTED: glycerophosphodiester phosphodiesterase gde1-like isoform X1 [Phoenix dactylifera]
c127475_g2	132.82	120.82	126.93	73.17	46.75	65.17	112.76	103.76	102.42	gi|672178843|ref|XP_008809569.1| PREDICTED: protein BOBBER 1-like [Phoenix dactylifera]
c144059_g1	132.78	187.94	189.9	58.46	116.35	119.97	136.04	203.67	185.45	gi|695024292|ref|XP_009399353.1| PREDICTED: transmembrane emp24 domain-containing protein p24beta3-like [Musa acuminata subsp. malaccensis]
c148517_g4	132.71	61.09	54.75	123.69	56.39	53.68	46.57	23.29	19.74	-
c128170_g1	132.53	61.41	68.98	1.64	1.23	1.16	0.58	0.19	0.12	gi|698495459|ref|XP_009793839.1| PREDICTED: 1-aminocyclopropane-1-carboxylate oxidase 5-like [Nicotiana sylvestris]
c149450_g1	132.51	44.25	49.27	72.34	35.59	37.66	122.2	46.87	49.31	gi|743782107|ref|XP_010921062.1| PREDICTED: uncharacterized 38.1 kDa protein-like isoform X2 [Elaeis guineensis]
c144567_g3	132.48	18.27	28.42	129.13	19.48	17.29	82.97	24.01	21.24	gi|461902|sp|P34887.1|CYPH_ALLCE RecName: Full=Peptidyl-prolyl cis-trans isomerase; Short=PPIase; AltName: Full=Cyclophilin; AltName: Full=Cyclosporin A-binding protein; AltName: Full=Rotamase gi|289118|gb|AAA32642.1| cyclophilin [Allium cepa]
c139558_g1	132.44	76.88	78.45	110.57	73.94	77.12	125.76	80.41	80.03	gi|720023951|ref|XP_010263488.1| PREDICTED: caffeoyl-CoA O-methyltransferase [Nelumbo nucifera]
c142149_g1	132.31	83.18	82.31	77.52	55.3	56.95	119.77	79.06	78.68	gi|719969448|ref|XP_010268476.1| PREDICTED: uncharacterized protein LOC104605415 [Nelumbo nucifera]
c134525_g1	132.3	34.15	19.58	89.82	31.02	53.81	217.91	31.24	30.1	-
c142662_g2	132.24	46.07	49	0.19	0.16	0.07	1.09	0.15	0.34	gi|514803513|ref|XP_004976643.1| PREDICTED: AT-hook motif nuclear-localized protein 23 [Setaria italica]
c134550_g1	132.18	129.18	126.96	197.82	195.29	190.41	158.3	165.58	154.16	gi|1035964839|gb|OAY85177.1| Mitochondrial dicarboxylate/tricarboxylate transporter DTC [Ananas comosus]
c134995_g1	132.14	127.14	130.31	204.58	196.58	154.84	52.56	46.39	45.56	gi|695052250|ref|XP_009414177.1| PREDICTED: gibberellin-regulated protein 5-like isoform X1 [Musa acuminata subsp. malaccensis]
c138461_g1	132.11	120.11	122.88	12.48	11.48	11.77	50.21	34.21	35.29	gi|695005453|ref|XP_009389178.1| PREDICTED: thaumatin-like protein 1 [Musa acuminata subsp. malaccensis]
c96161_g1	132.02	19.17	11.86	28.45	3.72	5.98	96.78	13.52	16.65	-
c138951_g1	131.93	49.19	41.97	123.47	44.55	41.71	117.73	41.37	44.86	gi|672199199|ref|XP_008777552.1| PREDICTED: cysteine desulfurase 1, mitochondrial-like [Phoenix dactylifera]
c148284_g3	131.89	18.34	30.95	87.67	15.98	15.44	107.4	14.29	18.28	gi|672196942|ref|XP_008776943.1| PREDICTED: LOW QUALITY PROTEIN: uncharacterized protein LOC103696977 [Phoenix dactylifera]
c136738_g2	131.88	95.4	97.88	32.68	23.68	24.13	33.99	44.98	47.99	gi|747080587|ref|XP_011087549.1| PREDICTED: uncharacterized protein LOC105169000 [Sesamum indicum]
c90582_g1	131.79	18.29	22.33	2330.98	314.07	332.67	271.12	47.75	71.02	gi|719988949|ref|XP_010252499.1| PREDICTED: uncharacterized protein LOC104594073 [Nelumbo nucifera]
c118842_g2	131.77	52.91	52.51	87.86	41.03	32.64	123.67	46.83	48.64	gi|743784630|ref|XP_010921707.1| PREDICTED: uncharacterized protein LOC105045215 [Elaeis guineensis]
c137712_g1	131.7	241.97	243.71	30.75	76.66	78.92	43.86	91.99	97.48	gi|743806988|ref|XP_010927917.1| PREDICTED: BTB/POZ and TAZ domain-containing protein 3-like [Elaeis guineensis] gi|743806990|ref|XP_010927918.1| PREDICTED: BTB/POZ and TAZ domain-containing protein 3-like [Elaeis guineensis]
c116070_g1	131.66	37.58	36.15	76.23	24.49	36.94	161.98	49.56	57.96	gi|1035941961|gb|OAY67825.1| Heterogeneous nuclear ribonucleoprotein Q [Ananas comosus]
c148649_g3	131.56	181.62	177.38	3.72	14.28	14.51	5.48	16.38	13.39	gi|743869659|ref|XP_010905864.1| PREDICTED: protease Do-like 7 [Elaeis guineensis]
c133669_g1	131.46	119.46	124.69	62.16	50.86	54.16	109.92	100.92	100.44	-
c150855_g1	131.36	88.59	88.57	31.1	13.71	16	27.55	20.01	21.23	gi|769803496|ref|XP_011625966.1| PREDICTED: copper transport protein ATX1 [Amborella trichopoda]
c69314_g1	131.35	21.94	21.75	109.42	18.37	10.77	131.26	19.34	26.27	gi|695022544|ref|XP_009398405.1| PREDICTED: uncharacterized protein LOC103983007 isoform X2 [Musa acuminata subsp. malaccensis]
c142019_g2	131.14	97.08	98.3	0.06	0.1	0.35	1.34	1.14	1.57	gi|727496288|ref|XP_010424188.1| PREDICTED: uncharacterized protein LOC104709237 [Camelina sativa]
c108191_g1	131.1	26.57	24.12	40.15	0	11.08	108.82	22.73	27.49	-
c150736_g1	131.08	87.01	91.64	70.42	73.89	74.52	58.52	39	39.59	gi|743824715|ref|XP_010932849.1| PREDICTED: GDP-mannose 3,5-epimerase 2 [Elaeis guineensis]
c146484_g5	130.95	114.54	121.73	128.12	114.68	104.74	308.01	263.37	225.24	-
c143615_g1	130.93	65.24	69.16	105.54	61.49	62.35	118.12	62.65	67.7	gi|672125377|ref|XP_008786105.1| PREDICTED: uncharacterized protein LOC103704543 isoform X1 [Phoenix dactylifera]
c146770_g3	130.84	92.51	102.74	70.36	49.7	49.77	97.48	48.36	48.7	gi|672128461|ref|XP_008787719.1| PREDICTED: molybdopterin biosynthesis protein CNX1 [Phoenix dactylifera]
c128647_g1	130.81	185.48	184.91	46.02	80.91	81.62	45.19	58.25	59.91	gi|380691544|emb|CCA60865.1| phosphoenolpyruvate carboxylase, partial [Alloteropsis semialata subsp. semialata]
c137729_g1	130.81	116.56	130.48	95.06	94.97	92.42	206.91	196.71	189.9	gi|743791033|ref|XP_010923316.1| PREDICTED: transcription factor bHLH79 isoform X1 [Elaeis guineensis]
c95475_g1	130.78	115.78	113.09	30.69	29.03	25.69	60.67	58.94	52.67	gi|743770963|ref|XP_010915768.1| PREDICTED: uncharacterized protein LOC105040781 [Elaeis guineensis]
c132510_g1	130.7	102.61	113.23	47.51	46.63	45.16	103.62	93.36	74.09	gi|1035954516|gb|OAY76512.1| 54S ribosomal protein L51, mitochondrial [Ananas comosus]
c128299_g1	130.69	84.08	87.49	76.32	59.19	54.15	120.23	75.34	74.23	gi|672182023|ref|XP_008811248.1| PREDICTED: uncharacterized protein LOC103722459 [Phoenix dactylifera]
c141739_g1	130.65	135.42	125.43	102.51	81.67	95.1	141.09	150.23	136.95	gi|743871584|ref|XP_010906341.1| PREDICTED: protein RER1B-like [Elaeis guineensis]
c147532_g2	130.61	235.61	241.08	39.64	85.99	85.23	113.49	241.83	236.05	gi|731910832|gb|AIZ68158.1| heat shock protein 90 [Ornithogalum longebracteatum]
c147989_g13	130.6	114.65	121.13	76.31	80.23	79.42	107.61	78	75.48	gi|672166693|ref|XP_008803276.1| PREDICTED: transcriptional corepressor SEUSS-like [Phoenix dactylifera] gi|672166695|ref|XP_008803277.1| PREDICTED: transcriptional corepressor SEUSS-like [Phoenix dactylifera] gi|672166697|ref|XP_008803278.1| PREDICTED: transcriptional corepressor SEUSS-like [Phoenix dactylifera] gi|672166699|ref|XP_008803279.1| PREDICTED: transcriptional corepressor SEUSS-like […
c24410_g1	130.54	68.75	32.99	64.22	12.69	42.22	105.08	36.15	25.82	-
c115893_g1	130.53	47.93	44.63	99.75	40.41	39.44	109.61	45.67	45.1	gi|255638995|gb|ACU19798.1| unknown [Glycine max]
c144751_g3	130.51	92.2	90.78	74.46	42.99	48.3	105.13	78.88	80.28	gi|743772627|ref|XP_010916627.1| PREDICTED: UDP-glucuronate:xylan alpha-glucuronosyltransferase 2-like isoform X2 [Elaeis guineensis]
c139112_g1	130.45	177.58	189.7	29.33	54.65	38.65	55.17	39.12	38.85	gi|743879127|ref|XP_010908343.1| PREDICTED: probable tyrosine-protein phosphatase At1g05000 [Elaeis guineensis]
c109219_g1	130.41	61.14	66.27	62.95	38.59	30.12	24.16	15.13	14.07	gi|719965050|ref|XP_010255294.1| PREDICTED: uncharacterized protein LOC104596014 [Nelumbo nucifera]
c136654_g1	130.25	74.8	83.95	69.11	47.2	48.99	47.34	29.9	28.18	gi|672166498|ref|XP_008803179.1| PREDICTED: extradiol ring-cleavage dioxygenase-like [Phoenix dactylifera]
c234479_g1	130.19	31.11	35.2	16.59	6.24	5.81	80.43	15.25	17.4	gi|1029116572|ref|XP_016736746.1| PREDICTED: scopoletin glucosyltransferase-like [Gossypium hirsutum]
c130038_g2	130.17	38.17	39.6	85.34	31.19	32.21	170.99	55.1	61.75	gi|661899126|emb|CDO97120.1| unnamed protein product [Coffea canephora]
c139806_g1	130.11	374.97	385.69	189.39	795.57	748.79	118.63	571.46	561.55	-
c149343_g1	129.96	201.81	197.87	75.96	165.24	167.42	91.13	169.41	172.55	gi|641848487|gb|KDO67364.1| hypothetical protein CISIN_1g020272mg [Citrus sinensis]
c94493_g1	129.91	121.91	122.41	66.05	51.05	52.75	137.66	149.66	174.09	-
c120181_g1	129.59	66.95	54.03	352.41	194.22	209.11	387.35	189.27	178.15	-
c129936_g1	129.56	108.02	98.14	61.56	101.51	65.94	208.39	179.12	198.2	gi|672122880|ref|XP_008784784.1| PREDICTED: 40S ribosomal protein S12-like isoform X2 [Phoenix dactylifera]
c148113_g2	129.47	97.85	93.63	67.51	67.37	65.99	115.51	78.57	79.08	gi|743863902|ref|XP_010943901.1| PREDICTED: nucleolin-like isoform X2 [Elaeis guineensis]
c113625_g1	129.42	84.34	119.93	120.4	99.63	97.05	184.79	148.45	150.23	-
c148240_g2	129.4	44.54	52.8	44.13	9.44	10.62	106.11	61.34	68.25	gi|18652196|gb|AAL77005.1| aldehyde dehydrogenase, partial [Allium cepa]
c142332_g5	129.37	117.37	116.84	207.58	202.58	203.07	187.26	171.26	171.23	gi|763797703|gb|KJB64658.1| hypothetical protein B456_010G059800 [Gossypium raimondii]
c139865_g4	129.36	105.77	104.36	81.68	41.85	46.68	123.13	98.13	102.17	gi|695078970|ref|XP_009386889.1| PREDICTED: UBP1-associated protein 2B-like [Musa acuminata subsp. malaccensis]
c144764_g3	129.32	33.55	34.55	116.77	33.55	58.09	135.32	28.08	32.74	gi|695019940|ref|XP_009397000.1| PREDICTED: splicing factor 3B subunit 6-like protein [Musa acuminata subsp. malaccensis]
c149107_g5	129.27	300.57	284.98	24.49	49.7	47.71	31.87	78.57	80.7	gi|743885404|ref|XP_010909913.1| PREDICTED: cationic amino acid transporter 2, vacuolar-like [Elaeis guineensis]
c136181_g2	129.22	97.92	99.17	48.05	42.59	44	77.3	67.64	66.16	gi|743768490|ref|XP_010914520.1| PREDICTED: protein DEHYDRATION-INDUCED 19 homolog 2-like isoform X2 [Elaeis guineensis]
c148513_g4	129.07	121.85	122.93	41.45	50.88	49.14	183.86	172.05	166	gi|672118013|ref|XP_008782204.1| PREDICTED: polyadenylate-binding protein RBP47-like isoform X1 [Phoenix dactylifera]
c145861_g1	129	234.24	258.25	86.06	167.89	173.89	149.51	255.78	250.7	gi|720038640|ref|XP_010268045.1| PREDICTED: probable protein disulfide-isomerase A6 [Nelumbo nucifera]
c145565_g1	128.94	392.27	394.25	22.35	93.07	86.07	16.1	72.72	73.49	gi|743807125|ref|XP_010927988.1| PREDICTED: sodium-coupled neutral amino acid transporter 2-like [Elaeis guineensis]
c131134_g1	128.89	123.89	115.52	67.82	59.82	58.77	95.95	82.32	88.95	gi|720020314|ref|XP_010262366.1| PREDICTED: casein kinase I-like [Nelumbo nucifera]
c121591_g1	128.89	59.03	57.82	0.92	0.35	0	4.17	2.64	2.65	gi|672124192|ref|XP_008785470.1| PREDICTED: UDP-glycosyltransferase 85A5-like [Phoenix dactylifera]
c149946_g1	128.88	72.4	87.58	57.96	42.44	41.71	120.24	73.72	71.03	gi|743806706|ref|XP_010927771.1| PREDICTED: aspartokinase 2, chloroplastic-like [Elaeis guineensis]
c116746_g1	128.87	116.87	119.47	36.29	31.29	28.41	121.64	105.64	111.32	gi|747096533|ref|XP_011096192.1| PREDICTED: vesicle-associated protein 4-2 [Sesamum indicum]
c23162_g1	128.76	99.74	103.76	96.98	75.25	61.98	146.87	121.87	127.77	gi|672174637|ref|XP_008807446.1| PREDICTED: uncharacterized protein LOC103719813 isoform X2 [Phoenix dactylifera]
c149580_g6	128.68	47.05	53.15	69.1	31.28	29.21	131.73	45.63	45.3	gi|697167217|ref|XP_009592455.1| PREDICTED: 26S proteasome regulatory subunit 4 homolog A-like, partial [Nicotiana tomentosiformis]
c104149_g1	128.67	83.79	108.46	16.7	12.83	19.99	51.61	50.19	47.28	gi|743755766|ref|XP_010913307.1| PREDICTED: nuclear transcription factor Y subunit B-3-like isoform X3 [Elaeis guineensis]
c127160_g1	128.37	62.79	67.33	15.38	8.58	9.45	42.18	22.47	22.78	gi|743783194|ref|XP_010921344.1| PREDICTED: uncharacterized protein LOC105044938 [Elaeis guineensis]
c103697_g1	128.28	120.28	61.51	111.09	96.09	99.72	351.87	363.87	279.68	gi|194695264|gb|ACF81716.1| unknown [Zea mays] gi|313586535|gb|ADR71278.1| 60S ribosomal protein L23C [Hevea brasiliensis] gi|992282249|gb|KXG40219.1| hypothetical protein SORBI_001G510800 [Sorghum bicolor]
c138122_g6	128.26	117.69	129.1	116.78	115.83	111.99	145.22	147.65	148.23	gi|743765386|ref|XP_010912913.1| PREDICTED: uncharacterized protein LOC105038739 [Elaeis guineensis]
c128583_g1	128.18	120.18	119.82	104.4	89.4	93.54	190.18	202.18	210.35	gi|672181077|ref|XP_008810744.1| PREDICTED: protein SPIRAL1-like 3 isoform X2 [Phoenix dactylifera]
c145356_g3	128.03	90.99	88.91	492.81	224.26	225.81	153.7	99.63	97.78	gi|743829496|ref|XP_010934167.1| PREDICTED: protein CURVATURE THYLAKOID 1B, chloroplastic-like [Elaeis guineensis]
c133549_g1	128.02	35.31	37.82	157.25	49.93	60.45	123.76	37.72	45.43	-
c140589_g3	127.99	67.43	65.31	40.3	23.77	24.11	74.46	36.9	39.23	gi|719963183|ref|XP_010248911.1| PREDICTED: uncharacterized protein LOC104591663 [Nelumbo nucifera]
c126341_g1	127.96	122.96	137.34	18.49	10.49	10.88	46.6	42.3	39.6	gi|743819231|ref|XP_010931461.1| PREDICTED: mini zinc finger protein 1-like [Elaeis guineensis]
c135966_g2	127.77	119.77	123.17	93.81	78.81	74.87	155.32	167.32	168.11	gi|1025271841|ref|XP_016493839.1| PREDICTED: polyadenylate-binding protein 8-like [Nicotiana tabacum]
c142693_g1	127.69	112.88	114.86	28.6	16.04	15.09	70.54	44.01	62.44	gi|1035938896|gb|OAY66071.1| hypothetical protein ACMD2_10371 [Ananas comosus]
c140041_g1	127.68	153.76	160.26	190.68	249.1	244.92	198.32	289.09	270.36	gi|743755082|ref|XP_010932447.1| PREDICTED: mitochondrial outer membrane protein porin 1-like [Elaeis guineensis]
c128004_g1	127.66	119.66	129.08	56.08	41.08	49.37	22.74	34.74	30.64	gi|514793889|ref|XP_004972924.1| PREDICTED: E3 ubiquitin-protein ligase RGLG2 [Setaria italica] gi|944236585|gb|KQL00923.1| hypothetical protein SETIT_013872mg [Setaria italica]
c146002_g1	127.66	112.31	86.65	277.42	130.28	158	274.05	136.23	126.47	gi|695045009|ref|XP_009410282.1| PREDICTED: uncharacterized protein LOC103992350 [Musa acuminata subsp. malaccensis]
c140460_g2	127.59	112.33	118.35	63.25	62.35	62.28	97.23	94.24	93.56	gi|672184800|ref|XP_008812660.1| PREDICTED: cyclin-L1-1 isoform X4 [Phoenix dactylifera]
c144550_g4	127.43	109.36	122.21	77.76	63.8	70.35	128.96	101.39	124.82	gi|113594686|dbj|BAF18560.1| Os06g0124900, partial [Oryza sativa Japonica Group]
c140754_g2	127.01	120.29	121.79	114.75	96.01	107.34	139.9	131.55	135.76	gi|695033730|ref|XP_009404348.1| PREDICTED: probable mediator of RNA polymerase II transcription subunit 26c [Musa acuminata subsp. malaccensis]
c130257_g1	126.92	139.06	136.93	96.38	84.27	92.39	111.77	98.82	106.29	gi|1035963950|gb|OAY84391.1| hypothetical protein ACMD2_02013 [Ananas comosus]
c113334_g1	126.92	46.98	37.86	16.21	5.86	5.81	60.91	18.42	25.92	gi|695075055|ref|XP_009384754.1| PREDICTED: scopoletin glucosyltransferase-like [Musa acuminata subsp. malaccensis]
c139369_g1	126.71	114.71	118.06	75.54	70.54	76.54	107.28	91.28	100.67	gi|950981737|ref|XP_014502366.1| PREDICTED: pyruvate dehydrogenase E1 component subunit alpha, mitochondrial [Vigna radiata var. radiata]
c122259_g1	126.7	59.01	64.84	73.84	22.52	31.94	174.24	58.97	60.71	gi|695060321|ref|XP_009418545.1| PREDICTED: mitotic-spindle organizing protein 1A-like [Musa acuminata subsp. malaccensis] gi|695060323|ref|XP_009418546.1| PREDICTED: mitotic-spindle organizing protein 1A-like [Musa acuminata subsp. malaccensis]
c150108_g1	126.64	617.75	565.42	31.26	49.95	39.26	360.54	325.54	315.86	-
c145621_g1	126.6	54.98	61.9	94.82	52.23	53.18	126.45	59.6	50.64	-
c148301_g2	126.53	159.67	159.92	66.75	95.25	98.36	147.95	178.1	179.91	gi|743808292|ref|XP_010928300.1| PREDICTED: pyrophosphate-energized vacuolar membrane proton pump [Elaeis guineensis]
c146974_g6	126.52	207.05	244.51	84.04	165.31	146.11	166.3	317.99	274.02	gi|1025341328|ref|XP_016508315.1| PREDICTED: elongation factor 1-alpha-like [Nicotiana tabacum]
c117283_g1	126.51	149.34	104.51	149.5	125.8	137.5	31.2	8.67	41.2	gi|386688290|gb|AFJ21575.1| vacuolar invertase [Agave tequilana] gi|386688302|gb|AFJ21581.1| putative vacuolar invertase [Agave tequilana]
c111541_g1	126.5	21.31	24.02	123.8	20.13	27.08	511.12	161.52	186.1	-
c91211_g1	126.49	44.2	36.53	69.89	11.55	26.71	123.62	35.21	36.66	-
c145425_g1	126.39	87.01	86.23	21.92	26.44	35.26	49.02	42.34	47.19	gi|720005574|ref|XP_010257702.1| PREDICTED: zinc finger A20 and AN1 domain-containing stress-associated protein 6-like [Nelumbo nucifera]
c145761_g6	126.38	91.31	90.93	47.6	44.13	38.02	109.42	69.96	60.46	-
c145646_g8	126.3	86.57	104.85	61.06	51.41	55.31	164.88	114.88	125.98	gi|672113146|ref|XP_008809425.1| PREDICTED: protein YIPF1 homolog isoform X2 [Phoenix dactylifera]
c117642_g1	126.24	93.96	101.24	102.17	51.07	67.17	154.31	129.31	146.07	-
c55716_g1	126.18	94.13	80.44	50.39	38.44	78.36	65.78	108.69	65.38	gi|802673381|ref|XP_012081596.1| PREDICTED: probable LRR receptor-like serine/threonine-protein kinase At5g10290 [Jatropha curcas] gi|802673394|ref|XP_012081597.1| PREDICTED: probable LRR receptor-like serine/threonine-protein kinase At5g10290 [Jatropha curcas]
c145175_g2	126.14	159.55	167.4	114.48	187.25	173.89	64.91	100.27	98.33	gi|672190218|ref|XP_008775186.1| PREDICTED: LOW QUALITY PROTEIN: 3-isopropylmalate dehydratase large subunit-like [Phoenix dactylifera]
c143325_g1	126.02	58.51	59.02	32.11	17.13	17.01	82.98	40.97	44.69	gi|743812016|ref|XP_010929316.1| PREDICTED: probable WRKY transcription factor 11 [Elaeis guineensis]
c51026_g1	125.84	117.84	121.56	25.33	10.33	26.73	70.53	82.53	48.07	gi|672156690|ref|XP_008798028.1| PREDICTED: uncharacterized protein LOC103713044 [Phoenix dactylifera]
c137447_g1	125.73	156.5	152.81	74.14	118.96	116.8	150.97	238.08	244.65	gi|255740155|gb|ACU31840.1| translation elongation factor 1 alpha, partial [Populus trichocarpa x Populus deltoides]
c150843_g2	125.69	217.95	222.65	182.09	436.71	446.36	109.45	211.91	208.24	gi|743757227|ref|XP_010921013.1| PREDICTED: LOW QUALITY PROTEIN: probable disease resistance protein At1g12280 [Elaeis guineensis]
c145398_g2	125.58	120.58	115.09	31.42	23.42	27.3	50.61	44.53	43.61	gi|695051261|ref|XP_009413649.1| PREDICTED: uncharacterized protein LOC103994913 [Musa acuminata subsp. malaccensis] gi|695051263|ref|XP_009413650.1| PREDICTED: uncharacterized protein LOC103994913 [Musa acuminata subsp. malaccensis]
c128268_g1	125.54	968.53	979.7	1.82	40	34.12	8.63	106.51	97.33	-
c138742_g1	125.48	117.48	125.25	90.18	75.18	65.81	116.9	128.9	124.91	gi|470117351|ref|XP_004294822.1| PREDICTED: uncharacterized protein LOC101299457 isoform X1 [Fragaria vesca subsp. vesca]
c133106_g1	125.39	50.13	51.65	134	54.84	56.77	283.3	119.41	111.75	gi|743872622|ref|XP_010906598.1| PREDICTED: E3 ubiquitin-protein ligase RING1-like [Elaeis guineensis]
c132830_g3	125.33	79.15	91.33	157.52	148.52	164.32	430.7	453.68	444.7	gi|1009113519|ref|XP_015873189.1| PREDICTED: tubulin beta-4 chain-like, partial [Ziziphus jujuba]
c145378_g2	125.33	37.46	38.28	89.61	30.67	32.31	146.87	45.42	53.41	gi|947067954|gb|KRH17097.1| hypothetical protein GLYMA_14G1977001, partial [Glycine max]
c148807_g2	125.32	89.18	55.96	46.15	22.72	20.85	74.74	48.63	54.25	gi|442803155|gb|AGC78890.1| hypothetical protein (mitochondrion) [Vicia faba] gi|442803268|gb|AGC79003.1| hypothetical protein (mitochondrion) [Vicia faba]
c142817_g1	125.11	116.41	112.98	39.06	41.26	40.78	20.73	23.22	23.96	gi|672172242|ref|XP_008806208.1| PREDICTED: uncharacterized protein LOC103718962 [Phoenix dactylifera]
c125407_g3	125.08	73.6	78.17	74.02	52.01	54.25	84.63	57.69	58.22	gi|672114460|ref|XP_008777084.1| PREDICTED: oxysterol-binding protein-related protein 3A-like [Phoenix dactylifera]
c143238_g1	124.93	44.95	43.7	0.75	0.61	0.76	1.09	4.67	0.69	-
c148678_g4	124.92	30.31	31.46	72.55	21.53	21.19	119.29	34.61	38.08	gi|224111990|ref|XP_002316045.1| DNA-binding enhancer family protein [Populus trichocarpa] gi|743798373|ref|XP_011010492.1| PREDICTED: huntingtin-interacting protein K-like [Populus euphratica] gi|222865085|gb|EEF02216.1| DNA-binding enhancer family protein [Populus trichocarpa]
c143082_g2	124.92	137.66	135.08	250.1	304.32	308.25	160.21	174.5	180.81	gi|743884872|ref|XP_010909790.1| PREDICTED: ankyrin repeat domain-containing protein 2-like [Elaeis guineensis]
c132353_g1	124.91	116.39	106.81	100.32	88.01	58.41	159.86	151.45	151.29	gi|721642296|ref|XP_010231997.1| PREDICTED: uncharacterized protein LOC100841225 isoform X2 [Brachypodium distachyon] gi|944073143|gb|KQK08627.1| hypothetical protein BRADI_2g42932 [Brachypodium distachyon]
c142049_g6	124.82	86.63	99.82	86.34	49.15	51.34	104.77	79.77	80.68	gi|672115707|ref|XP_008780998.1| PREDICTED: 26S proteasome non-ATPase regulatory subunit 4 homolog [Phoenix dactylifera]
c150051_g1	124.82	702.75	708.44	53.56	394.6	384.18	56.35	384.75	370.84	gi|743835355|ref|XP_010935787.1| PREDICTED: puromycin-sensitive aminopeptidase isoform X1 [Elaeis guineensis] gi|743835357|ref|XP_010935788.1| PREDICTED: puromycin-sensitive aminopeptidase isoform X1 [Elaeis guineensis]
c141796_g1	124.81	112.81	124.22	50.92	45.92	49.04	78.41	62.41	57.6	-
c150066_g1	124.81	130.38	126.53	33.74	45.77	57.32	76.93	87.98	83.59	gi|743833835|ref|XP_010935362.1| PREDICTED: protein argonaute 1B-like [Elaeis guineensis]
c136702_g4	124.77	112.77	117.96	96.5	78.57	88.5	203.53	194.53	198.89	gi|720001716|ref|XP_010256446.1| PREDICTED: transcription factor BTF3 homolog 4-like isoform X2 [Nelumbo nucifera]
c127620_g1	124.73	59.33	60.5	4.58	1.91	1.92	12.36	7.41	7.75	gi|590689878|ref|XP_007043352.1| Uclacyanin 1, putative [Theobroma cacao] gi|508707287|gb|EOX99183.1| Uclacyanin 1, putative [Theobroma cacao]
c140534_g2	124.67	112.67	123.59	307.03	312.81	299.03	146.25	137.25	139.7	gi|720020476|ref|XP_010262413.1| PREDICTED: DAG protein, chloroplastic [Nelumbo nucifera]
c149935_g3	124.6	41.55	40.11	130.33	79.13	50.38	119.52	49.05	47.24	gi|672188413|ref|XP_008813581.1| PREDICTED: anthranilate phosphoribosyltransferase, chloroplastic-like isoform X2 [Phoenix dactylifera]
c144394_g1	124.54	104.07	102.2	49.73	46.19	47.34	87.09	75.62	76.02	gi|1035962306|gb|OAY82946.1| Ras-related protein RABA5a [Ananas comosus]
c133107_g1	124.54	119.43	124.26	2.86	4.02	3.3	8.01	11.45	11.08	gi|743840976|ref|XP_010937411.1| PREDICTED: nitronate monooxygenase [Elaeis guineensis] gi|743840980|ref|XP_010937412.1| PREDICTED: nitronate monooxygenase [Elaeis guineensis] gi|743840986|ref|XP_010937413.1| PREDICTED: nitronate monooxygenase [Elaeis guineensis]
c150517_g2	124.43	75.67	78	54.74	35.52	37.72	114.56	71.35	79.42	gi|743762418|ref|XP_010908053.1| PREDICTED: uncharacterized protein LOC105034541 [Elaeis guineensis]
c149379_g2	124.42	109.42	106.21	74.77	60.56	69.77	150.17	130.98	142.17	-
c145819_g3	124.41	65.84	73.37	67.36	44.27	44.14	66.76	38.1	40.06	gi|743759054|ref|XP_010930069.1| PREDICTED: protein TRANSPARENT TESTA 12-like isoform X1 [Elaeis guineensis]
c131230_g5	124.35	116.35	118.4	60.32	45.32	54.8	166.85	178.85	192.77	gi|743918324|ref|XP_011003162.1| PREDICTED: ubiquitin-40S ribosomal protein S27a-like [Populus euphratica]
c46179_g1	124.26	49.14	38.49	71.95	16.96	31.31	80.59	24.49	27.16	-
c140580_g1	124.18	112.18	123.06	83.34	78.34	84.75	166.8	150.8	149.82	gi|743811331|ref|XP_010929133.1| PREDICTED: protein transport protein SEC13 homolog B-like [Elaeis guineensis]
c145189_g3	124.18	113.79	118.96	80.18	74.91	72.77	233.24	241.24	229.1	gi|743764091|ref|XP_010912250.1| PREDICTED: 60S acidic ribosomal protein P2B-like [Elaeis guineensis] gi|448872696|gb|AGE46033.1| 60S acidic ribosomal protein P2B [Elaeis guineensis]
c72256_g1	124.18	59.97	66.16	58.99	41.76	40.22	82.9	44.03	32.96	-
c128856_g1	124.12	42.64	41.91	70.95	24.27	24.1	145.19	52.73	51.95	gi|743873851|ref|XP_010906930.1| PREDICTED: prohibitin-3, mitochondrial-like [Elaeis guineensis]
c122644_g1	124.03	24.51	24.13	74.19	18.14	21.63	146.2	26.31	26.36	gi|672168639|ref|XP_008804326.1| PREDICTED: importin-5-like [Phoenix dactylifera]
c144207_g1	123.92	108.92	99.24	58.54	56.09	53.54	88.06	75.63	80.06	gi|1026028557|ref|XP_016560536.1| PREDICTED: pre-mRNA-splicing factor CWC25 homolog isoform X2 [Capsicum annuum]
c148393_g1	123.83	111.83	117.15	88.31	83.56	80.31	91.53	82.53	93.61	gi|728843375|gb|KHG22818.1| Serine/threonine-protein phosphatase BSL3 -like protein [Gossypium arboreum]
c139894_g2	123.83	144.48	141.34	76	115.8	108.44	98.43	125.83	122.29	gi|672124062|ref|XP_008785408.1| PREDICTED: 26S proteasome non-ATPase regulatory subunit 7 homolog A isoform X1 [Phoenix dactylifera]
c20228_g1	123.8	0	0	19.67	0	0	40.48	0	0	-
c148913_g2	123.73	115.21	121.28	92.92	80.61	84.21	112.95	99.47	104.38	gi|672170429|ref|XP_008805271.1| PREDICTED: caltractin-like isoform X2 [Phoenix dactylifera]
c130187_g1	123.72	74.59	66.33	99.45	77.69	43.53	667.45	363.2	327.16	gi|728823408|gb|KHG05288.1| Tubulin beta-1 chain [Gossypium arboreum] gi|728823870|gb|KHG05501.1| Tubulin beta-1 chain [Gossypium arboreum]
c146777_g2	123.72	82.27	93.59	23.89	18.33	17.2	20.26	14.82	14.54	gi|768806664|gb|AJV90886.1| PLATZ1 [Narcissus tazetta var. chinensis]
c149648_g6	123.69	54.53	58.05	43.79	19.8	23.56	103.19	37.88	39.16	gi|672109107|ref|XP_008788500.1| PREDICTED: transcription factor HBP-1a-like isoform X3 [Phoenix dactylifera]
c144403_g1	123.68	99.25	99.26	75.06	63.29	62.34	103.34	71.23	72.89	gi|725827527|gb|AIY34665.1| 4-coumarate:CoA ligase-like protein [Ornithogalum longebracteatum]
c120670_g1	123.67	118.67	141.48	124.17	116.17	120.79	67.57	56.04	60.57	gi|743860526|ref|XP_010943034.1| PREDICTED: polcalcin Phl p 7-like [Elaeis guineensis]
c114124_g1	123.5	41.75	48.3	103.97	40.1	54.12	127.56	40.34	38.2	-
c144394_g3	123.47	109.27	118.1	96.77	105.77	102.29	172.53	182.9	168.07	gi|225443554|ref|XP_002277579.1| PREDICTED: ras-related protein RABA1f [Vitis vinifera]
c120864_g1	123.31	71.88	68.35	30.09	17.66	13.97	46.37	21.76	26.1	-
c128182_g1	123.28	62.8	63.99	85.72	47.29	43.87	140.14	76.81	74.33	gi|253684301|gb|ACT33369.1| mago nashi [Lycoris radiata]
c143462_g5	123.25	583.63	603.16	14.75	111.88	112.67	40.63	317.26	309.7	gi|672201358|ref|XP_008778118.1| PREDICTED: uncharacterized protein LOC103697950 [Phoenix dactylifera]
c134069_g3	123.17	103.61	119.96	99.04	85.04	80.45	228.96	217.9	222.71	gi|399525610|gb|AFP44117.1| 60S ribosomal protein [Lycoris longituba]
c139607_g1	123.16	90.88	98.16	121.26	77.51	86.26	130.59	105.59	105.86	gi|371721826|gb|AEX55236.1| late embryogenesis abundant protein lea14-a [Allium sativum]
c148425_g1	123.02	88.56	104.36	53.74	51.71	49.78	100.7	59.75	63	gi|743758894|ref|XP_010929323.1| PREDICTED: transcription factor GTE9-like isoform X2 [Elaeis guineensis]
c146753_g1	122.88	100.94	97.88	105.68	70.64	70.68	153.81	128.81	128.79	gi|695028836|ref|XP_009401810.1| PREDICTED: zinc finger protein GIS2-like [Musa acuminata subsp. malaccensis] gi|695028838|ref|XP_009401811.1| PREDICTED: zinc finger protein GIS2-like [Musa acuminata subsp. malaccensis] gi|695028840|ref|XP_009401812.1| PREDICTED: zinc finger protein GIS2-like [Musa acuminata subsp. malaccensis] gi|695028842|ref|XP_009401813.1| PREDICTED: zinc finger protein GIS2-…
c117588_g1	122.85	58.01	56.37	41.85	22.31	27.36	45.95	26.55	19.21	gi|1035956923|gb|OAY78430.1| F-box protein PP2-A13 [Ananas comosus]
c145151_g1	122.8	85.54	97.8	95.6	56.25	60.6	143.63	118.63	106.25	gi|527197526|gb|EPS66003.1| hypothetical protein M569_08777 [Genlisea aurea]
c137247_g1	122.73	112.34	117.51	46.89	33.48	39.48	109.02	101.43	104.88	gi|1032284404|gb|OAO98731.1| GRF1 [Arabidopsis thaliana]
c135854_g1	122.72	92.35	94.63	65.44	67.95	75.19	83.6	64.28	51.69	gi|703091152|ref|XP_010094273.1| MATH domain-containing protein [Morus notabilis] gi|587866047|gb|EXB55547.1| MATH domain-containing protein [Morus notabilis]
c147563_g1	122.71	51.5	52.55	115.39	57.7	54.87	455.71	188.66	191.85	gi|985563848|dbj|BAU46558.1| fructan:fructan 6G-fructosyltransferase [Allium cepa]
c149087_g1	122.69	110.69	115.27	92.27	78.73	84.27	51.49	42.49	39.85	gi|743870902|ref|XP_010906159.1| PREDICTED: glycerophosphodiester phosphodiesterase GDPD6 isoform X1 [Elaeis guineensis]
c120011_g1	122.64	217.6	224.5	57.98	134.31	113.83	119.01	251.08	264.8	gi|328923691|gb|AEB65935.1| actin [Cryptocoryne ciliata]
c135944_g1	122.53	110.93	106.47	64.68	61.09	59.9	142.69	136.77	135.05	gi|1035953784|gb|OAY75953.1| Gamma carbonic anhydrase 1, mitochondrial [Ananas comosus]
c146972_g1	122.52	117.6	119.31	248.19	234.19	229.73	556.11	549.48	549.86	gi|1022535358|gb|ANA75053.1| chitinase [Phalaenopsis hybrid cultivar]
c129126_g1	122.4	83.57	87.35	78.08	66.57	66.22	76.99	59.86	61.78	gi|1035940355|gb|OAY66843.1| Hydroxyacylglutathione hydrolase cytoplasmic [Ananas comosus]
c140178_g1	122.37	113.85	116.32	57.2	44.89	42.88	80.02	69.24	71.45	gi|743763423|ref|XP_010911895.1| PREDICTED: protein NRT1/ PTR FAMILY 5.10-like [Elaeis guineensis]
c88035_g1	122.36	81.39	86.38	252.82	176.49	176.22	279.45	185.81	187.16	gi|1035948133|gb|OAY72002.1| Protein YLS9 [Ananas comosus] gi|1035964271|gb|OAY84678.1| Protein YLS9 [Ananas comosus]
c144876_g2	122.3	163.04	170.94	1.54	7.95	10.64	3.31	6.95	6.1	gi|672162861|ref|XP_008801256.1| PREDICTED: cytochrome P450 86B1-like [Phoenix dactylifera]
c142331_g2	122.3	63.34	64.03	80.59	48.41	47.8	101.94	55.34	56.29	gi|1035935478|gb|OAY64253.1| hypothetical protein ACMD2_14623 [Ananas comosus]
c144564_g1	122.29	120.16	119.08	94.55	80.55	75.05	127.05	126.48	120.8	gi|672107724|ref|XP_008781229.1| PREDICTED: ubiquitin receptor RAD23d-like isoform X1 [Phoenix dactylifera]
c145391_g4	122.29	182.34	171.46	69.39	102.19	100.23	167.52	217.9	209.24	gi|720005487|ref|XP_010257672.1| PREDICTED: uncharacterized protein LOC104597674 [Nelumbo nucifera]
c140347_g1	122.2	66.06	85.73	60.42	37.14	33.13	134.58	95.56	94.31	gi|743838529|ref|XP_010936728.1| PREDICTED: uncharacterized protein LOC105056283 [Elaeis guineensis]
c149624_g3	122.15	158.37	135.51	1.58	1.49	1.8	34.39	31.72	38.57	gi|654205728|gb|AIC82456.1| lipoxygenase [Cocos nucifera]
c140270_g1	122.13	794.42	791.26	2.52	25.15	23.35	9.12	57.14	56.82	-
c128734_g4	121.99	78.97	139.49	119.78	260.48	181.04	58.71	95.38	120.38	gi|672209176|ref|XP_008780646.1| PREDICTED: disease resistance protein RPS5-like, partial [Phoenix dactylifera]
c144912_g1	121.91	51.95	46.69	89.08	20.27	16.99	140.53	30.06	59.36	gi|685383938|ref|XP_009124204.1| PREDICTED: DNA-damage-repair/toleration protein DRT102 [Brassica rapa]
c142839_g3	121.83	116.83	97.95	44.25	36.25	32.09	122	101.13	115	gi|672119046|ref|XP_008782748.1| PREDICTED: LOW QUALITY PROTEIN: zinc finger CCCH domain-containing protein 53-like [Phoenix dactylifera]
c137928_g1	121.77	116.38	116.55	66.47	56.89	59.06	123.67	125.74	119.53	-
c116717_g1	121.76	56.67	58.77	44.7	28.84	24.77	81.03	39.86	41.98	gi|743858984|ref|XP_010942517.1| PREDICTED: nuclear transcription factor Y subunit C-2-like [Elaeis guineensis] gi|743858988|ref|XP_010942519.1| PREDICTED: nuclear transcription factor Y subunit C-2-like [Elaeis guineensis] gi|743858992|ref|XP_010942520.1| PREDICTED: nuclear transcription factor Y subunit C-2-like [Elaeis guineensis] gi|743858994|ref|XP_010942521.1| PREDICTED: nuclear transcripti…
c148003_g2	121.75	74.51	74.61	75.72	73.23	70.44	731.05	346.77	376.89	gi|743859449|ref|XP_010942747.1| PREDICTED: EVI5-like protein isoform X1 [Elaeis guineensis] gi|743859465|ref|XP_010942752.1| PREDICTED: EVI5-like protein isoform X1 [Elaeis guineensis]
c132494_g5	121.53	109.53	126.4	37.51	32.51	32.68	86.34	70.34	65.7	-
c136640_g1	121.53	113.01	112.08	80.42	68.11	78.97	279.73	265.15	271.16	gi|359494079|ref|XP_002277391.2| PREDICTED: LOW QUALITY PROTEIN: 65-kDa microtubule-associated protein 1-like [Vitis vinifera]
c108658_g1	121.34	109.34	68.18	37.46	27.62	29.46	57.72	48.72	50.56	gi|527210156|gb|EPS74717.1| hypothetical protein M569_00042, partial [Genlisea aurea]
c123458_g1	121.33	59.69	58.59	45.98	23.76	27.09	123.98	75.87	71.32	gi|702238795|ref|XP_010033533.1| PREDICTED: pyruvate decarboxylase 2 [Eucalyptus grandis] gi|629123736|gb|KCW88161.1| hypothetical protein EUGRSUZ_A00549 [Eucalyptus grandis]
c148378_g4	121.3	125.2	116.46	67.73	85.71	70.69	107.36	125.39	127.15	gi|743767971|ref|XP_010914258.1| PREDICTED: protein SUPPRESSOR OF FRI 4-like [Elaeis guineensis]
c146070_g8	121.23	113.23	107.85	60.67	45.67	41.3	86.44	98.44	108.14	gi|743905781|ref|XP_011046296.1| PREDICTED: probable serine/threonine-protein kinase At4g35230 isoform X2 [Populus euphratica]
c147996_g1	121.19	60.93	68.35	88.09	55.13	56.78	72.34	41.62	42.97	gi|743882670|ref|XP_010909215.1| PREDICTED: BAG family molecular chaperone regulator 4-like [Elaeis guineensis]
c135031_g8	121.17	72.47	91.08	130.82	97.21	95.66	207.33	165.48	162.64	gi|1035904278|gb|OAY33877.1| hypothetical protein MANES_13G132500 [Manihot esculenta]
c143358_g4	121.17	58	60.11	167.9	86.32	85.08	97.8	52.08	53.38	gi|672107213|ref|XP_008799958.1| PREDICTED: hydroxyphenylpyruvate reductase-like [Phoenix dactylifera]
c143265_g3	121.13	60.42	59.76	114.25	66.3	85.35	197.92	116.81	120.34	gi|672114158|ref|XP_008775669.1| PREDICTED: translocase of chloroplast 34, chloroplastic-like [Phoenix dactylifera] gi|672114160|ref|XP_008775675.1| PREDICTED: translocase of chloroplast 34, chloroplastic-like [Phoenix dactylifera]
c150205_g4	121.05	109.05	111.82	135.4	130.4	127.13	368.56	352.56	355.11	gi|743858096|ref|XP_010942271.1| PREDICTED: fasciclin-like arabinogalactan protein 2 [Elaeis guineensis]
c145096_g6	120.99	24.83	26.06	0.95	0	0	7.84	0	0	-
c142276_g1	120.95	37.74	37.15	46.63	10.66	17.17	128.13	39.53	38.22	gi|1029005189|ref|XP_016666483.1| PREDICTED: 60S ribosomal protein L44-like [Gossypium hirsutum]
c137863_g2	120.83	112.31	115.3	90.26	77.95	75.35	87.71	78.43	79.14	gi|703157418|ref|XP_010111720.1| Isocitrate dehydrogenase [NAD] regulatory subunit 1 [Morus notabilis] gi|587945135|gb|EXC31559.1| Isocitrate dehydrogenase [NAD] regulatory subunit 1 [Morus notabilis]
c125097_g1	120.81	26.92	26.53	17.78	7.45	5.14	44.62	16.04	18.44	gi|743757121|ref|XP_010920378.1| PREDICTED: aspartate aminotransferase, cytoplasmic [Elaeis guineensis]
c142603_g5	120.81	45.5	48.49	79.16	42.29	34.44	245.25	120.76	120.76	gi|672182168|ref|XP_008811323.1| PREDICTED: cysteine proteinase inhibitor 1-like [Phoenix dactylifera]
c149189_g1	120.76	73.08	79.08	53.96	46.2	47.1	66.02	51.14	49.65	gi|460412238|ref|XP_004251509.1| PREDICTED: peroxisome biogenesis protein 22 [Solanum lycopersicum]
c146854_g6	120.74	108.74	112.27	71.41	66.05	63.41	112.27	103.27	107.02	gi|720037987|ref|XP_010267842.1| PREDICTED: glycine-rich RNA-binding protein 4, mitochondrial [Nelumbo nucifera]
c140852_g2	120.7	112.7	112.42	56.93	41.93	40.24	105.73	117.73	119.65	gi|743855598|ref|XP_010941506.1| PREDICTED: probable protein Pop3 [Elaeis guineensis]
c131643_g2	120.68	105.68	110.1	167.76	157.86	162.76	138.93	119.73	130.93	gi|1026045808|ref|XP_016569090.1| PREDICTED: 14-3-3 protein 10 [Capsicum annuum]
c149548_g5	120.64	134.53	142.99	87.35	139.67	139.74	58.5	75.56	81.82	gi|731366527|ref|XP_010695120.1| PREDICTED: autophagy-related protein 8f [Beta vulgaris subsp. vulgaris] gi|731366529|ref|XP_010695122.1| PREDICTED: autophagy-related protein 8f [Beta vulgaris subsp. vulgaris] gi|870845022|gb|KMS97854.1| hypothetical protein BVRB_5g122840 [Beta vulgaris subsp. vulgaris]
c146666_g5	120.61	98.56	95.61	204.25	167.24	169.25	292.13	267.13	273.46	-
c144464_g2	120.61	108.61	120.76	29.97	26.06	21.97	98.29	89.29	83.44	gi|695080831|ref|XP_009387901.1| PREDICTED: splicing factor 3A subunit 3 [Musa acuminata subsp. malaccensis]
c145268_g4	120.6	111.05	115.38	50.27	42.8	42.86	30.12	24.13	25.98	gi|695034809|ref|XP_009404870.1| PREDICTED: dirigent protein 22-like [Musa acuminata subsp. malaccensis]
c150495_g1	120.51	120.31	123.58	62.97	67.43	67.17	125.93	89.81	85.29	gi|672132888|ref|XP_008790036.1| PREDICTED: eukaryotic translation initiation factor 4G-like isoform X1 [Phoenix dactylifera]
c148035_g1	120.44	103.71	108.28	31.17	36.05	31.66	74.43	78.07	72.85	gi|743763416|ref|XP_010911892.1| PREDICTED: alkaline/neutral invertase CINV2-like [Elaeis guineensis] gi|743763419|ref|XP_010911893.1| PREDICTED: alkaline/neutral invertase CINV2-like [Elaeis guineensis] gi|743763421|ref|XP_010911894.1| PREDICTED: alkaline/neutral invertase CINV2-like [Elaeis guineensis]
c142984_g1	120.39	115.39	123.29	120.17	112.17	111.41	248.39	237.73	241.39	gi|743806883|ref|XP_010927862.1| PREDICTED: ras-related protein RABA2a-like [Elaeis guineensis]
c125407_g2	120.39	91.08	89.38	66.74	55.82	54.98	103.93	74.2	68.15	gi|694401730|ref|XP_009375898.1| PREDICTED: oxysterol-binding protein-related protein 3C-like isoform X2 [Pyrus x bretschneideri]
c147379_g1	120.35	42.35	63.39	86.4	14.51	53.87	167.64	69.29	54.42	gi|380863080|gb|AFF18833.1| ribonucleoside-diphosphate reductase small chain, partial [Dimocarpus longan]
c142349_g3	120.2	105.48	104.4	60.34	66.2	64.33	105.88	106.15	107.26	gi|743863302|ref|XP_010943758.1| PREDICTED: la protein 1-like [Elaeis guineensis]
c138568_g3	120.16	114.22	114.94	74.53	64.5	67.12	120.78	115.54	116.64	gi|743766392|ref|XP_010913436.1| PREDICTED: betaine aldehyde dehydrogenase 2-like [Elaeis guineensis]
c141631_g1	120.07	81.03	86.85	94.38	74.6	82.68	156.14	121.1	118.34	gi|1001822675|gb|AMM04376.1| UDP-xylose synthase [Ornithogalum longebracteatum]
c137779_g2	120.02	277.73	288.28	2.71	10.58	9.9	16.41	38.32	37.46	gi|256631568|dbj|BAH98158.1| yellow stripe 1-like [Tulipa gesneriana]
c137518_g1	119.98	49.65	52.13	66.41	29.75	30.31	75.78	45.1	41.51	gi|947119647|gb|KRH67896.1| hypothetical protein GLYMA_03G194000 [Glycine max]
c138571_g2	119.96	111.96	115.19	113.04	98.04	98.29	86.23	98.23	92.33	gi|720035385|ref|XP_010267025.1| PREDICTED: NADH dehydrogenase [ubiquinone] iron-sulfur protein 7, mitochondrial [Nelumbo nucifera]
c149335_g1	119.96	107.96	106.87	48.89	42.93	40.89	83.78	74.78	76.4	gi|743778380|ref|XP_010919649.1| PREDICTED: probable quinone oxidoreductase [Elaeis guineensis]
c130481_g2	119.91	107.91	102.42	64.45	59.45	57.81	145.26	129.26	132.02	gi|743823699|ref|XP_010932598.1| PREDICTED: protein FLX-like 3 [Elaeis guineensis]
c145426_g1	119.9	103.41	110.23	66.86	77.6	75.89	102.5	94.72	96.99	gi|372450232|ref|YP_005090385.1| ribosomal protein S11 (mitochondrion) [Phoenix dactylifera] gi|343478437|gb|AEM43925.1| ribosomal protein S11 (mitochondrion) [Phoenix dactylifera]
c145412_g4	119.83	104.83	102.82	59.11	52.86	54.11	108.63	96.3	100.63	gi|695014006|ref|XP_009393807.1| PREDICTED: V-type proton ATPase 16 kDa proteolipid subunit-like [Musa acuminata subsp. malaccensis]
c142965_g2	119.82	540.54	568.55	68.67	77.93	76.67	99.05	64.05	64.99	gi|1035961455|gb|OAY82206.1| Glutamate--cysteine ligase, chloroplastic [Ananas comosus]
c146789_g2	119.82	77.84	88.65	80.96	87.31	76.69	125.81	96.36	110.84	gi|576663720|gb|AHH32690.1| somatic embryogenesis receptor kinase 2, partial [Phoenix dactylifera]
c146453_g7	119.79	95.92	94.79	86.08	44.33	51.08	131.63	106.63	107.85	-
c137197_g1	119.79	61.35	63.81	26.25	14.31	17.72	139.29	79.29	74.37	gi|1035959573|gb|OAY80624.1| Transketolase, chloroplastic [Ananas comosus]
c139523_g1	119.75	58.96	60.3	86.37	41.4	42.4	122.6	59.95	66.86	gi|901795363|gb|KMZ58366.1| hypothetical protein ZOSMA_77G00250 [Zostera marina]
c134628_g1	119.74	74.79	81.64	124.46	68.92	81.74	187.8	100.6	117.33	gi|769815872|ref|XP_011622181.1| PREDICTED: LRR receptor-like serine/threonine-protein kinase EFR [Amborella trichopoda]
c126626_g2	119.7	104.7	101.04	79.56	78.12	74.56	186.39	186.26	178.39	gi|743835465|ref|XP_011025023.1| PREDICTED: 60S ribosomal protein L6-like [Populus euphratica] gi|743835469|ref|XP_011025024.1| PREDICTED: 60S ribosomal protein L6-like [Populus euphratica]
c123319_g2	119.68	107.68	111.83	106.23	101.23	104.47	195.82	179.82	178.52	gi|672203272|ref|XP_008778603.1| PREDICTED: coatomer subunit epsilon-1-like [Phoenix dactylifera]
c149533_g2	119.63	155.68	153.76	36.87	63.81	59.43	93.97	116.59	118.76	gi|743862165|ref|XP_010943467.1| PREDICTED: aconitate hydratase, cytoplasmic-like [Elaeis guineensis]
c142756_g3	119.62	135.85	130.62	36.07	43.34	43.74	57.66	66.3	67.6	gi|743760028|ref|XP_010934966.1| PREDICTED: uncharacterized protein LOC105054982 isoform X1 [Elaeis guineensis] gi|743760030|ref|XP_010934976.1| PREDICTED: uncharacterized protein LOC105054982 isoform X1 [Elaeis guineensis]
c117394_g1	119.61	145.7	155.1	55.18	69.77	83.42	234.19	351.1	348.77	gi|21068670|emb|CAD31841.1| putative adenosine kinase [Cicer arietinum]
c145969_g3	119.56	284.48	288.84	30.19	86.61	83.54	46.15	111.34	116.44	gi|672164048|ref|XP_008801889.1| PREDICTED: F-box/LRR-repeat protein 14 isoform X1 [Phoenix dactylifera] gi|672164050|ref|XP_008801890.1| PREDICTED: F-box/LRR-repeat protein 14 isoform X1 [Phoenix dactylifera]
c127720_g1	119.46	87.24	77.34	12.81	12	12.72	45.66	33.62	35.94	gi|224107975|ref|XP_002314674.1| Homocysteine S-methyltransferase 3 family protein [Populus trichocarpa] gi|222863714|gb|EEF00845.1| Homocysteine S-methyltransferase 3 family protein [Populus trichocarpa]
c146212_g5	119.42	259.82	262.06	19.4	41.98	51.75	39.17	113.84	108.92	gi|743851905|ref|XP_010940255.1| PREDICTED: SNF1-related protein kinase catalytic subunit alpha KIN10-like isoform X2 [Elaeis guineensis]
c141035_g1	119.4	190.44	162.21	323.99	550.02	527.73	433.82	614.87	563.66	gi|731911625|gb|AIZ68214.1| CBL-interacting protein kinase 18-like protein [Ornithogalum longebracteatum]
c143136_g2	119.33	45.71	47.68	47.01	17.3	15.22	74.54	27.64	40.02	gi|1026084764|ref|XP_016541667.1| PREDICTED: multiprotein-bridging factor 1b [Capsicum annuum]
c143595_g2	119.32	131.3	143.31	69.64	105.07	115.98	110.16	152.16	162.68	-
c138288_g1	119.25	110.73	92.82	58.55	46.24	47.05	111.63	106.77	103.06	gi|743755432|ref|XP_010909842.1| PREDICTED: glycylpeptide N-tetradecanoyltransferase 1-like [Elaeis guineensis]
c139262_g1	119.18	27.01	30.87	82.66	16.78	25.56	157.38	44.72	38.29	gi|672166262|ref|XP_008803057.1| PREDICTED: uncharacterized protein LOC103716719 isoform X2 [Phoenix dactylifera]
c143277_g1	119.13	83.99	79.76	66.58	57.02	50.74	109.07	83.64	85.1	gi|743762686|ref|XP_010909367.1| PREDICTED: dnaJ protein ERDJ2A-like [Elaeis guineensis]
c128663_g1	119.12	35.47	32.67	100.19	21.5	24.11	166.31	37.87	49.22	gi|1035955612|gb|OAY77385.1| Succinate dehydrogenase subunit 8A, mitochondrila [Ananas comosus]
c136702_g5	119.07	64.82	47.36	75.96	30.76	28.79	181.64	105.85	85.06	-
c139441_g5	119.04	87.11	94.04	76.97	36.88	41.97	191.69	166.69	147.98	gi|672123840|ref|XP_008785290.1| PREDICTED: 40S ribosomal protein S14-like [Phoenix dactylifera] gi|672123842|ref|XP_008785291.1| PREDICTED: 40S ribosomal protein S14-like [Phoenix dactylifera]
c145928_g1	119.03	86.5	93.14	72.07	54.06	60.69	67.55	52.33	45.59	gi|743776407|ref|XP_010918610.1| PREDICTED: LOW QUALITY PROTEIN: E3 ubiquitin-protein ligase RFWD3 [Elaeis guineensis]
c146616_g1	119.02	22.97	16.7	61.44	5.65	5.82	86.53	13.97	17.73	-
c140406_g2	119.02	105.56	109.06	31.22	51.62	51.33	70.51	72.3	67.61	gi|743877512|ref|XP_010907921.1| PREDICTED: SNF1-related protein kinase regulatory subunit beta-1-like [Elaeis guineensis]
c142983_g1	118.82	113.82	116.82	8.45	0.45	0.53	24.06	20.18	17.06	gi|743760265|ref|XP_010936028.1| PREDICTED: CBL-interacting protein kinase 7-like [Elaeis guineensis]
c147809_g1	118.61	42.49	70	62.25	17.18	22.27	581.23	204.6	231.53	gi|238012858|gb|ACR37464.1| unknown [Zea mays]
c136723_g3	118.52	110.52	124.76	58.01	43.01	51.31	87.15	99.15	96.32	gi|672187294|ref|XP_008813303.1| PREDICTED: uncharacterized protein LOC103723977 [Phoenix dactylifera]
c145394_g1	118.5	57.35	35.39	93.08	46.83	42.16	98.41	37.04	38.36	gi|743818709|ref|XP_010931302.1| PREDICTED: PRA1 family protein B1-like [Elaeis guineensis]
c105862_g1	118.49	88.92	93.49	44.86	7.67	9.86	12.66	9.66	8.72	-
c47154_g1	118.46	100.39	115.25	171.63	157.63	121.97	53.06	62.96	46.81	gi|1012346031|gb|KYP57223.1| Plasma membrane ATPase [Cajanus cajan]
c134882_g2	118.43	98.07	93.43	71.57	40.51	36.57	128.38	103.38	107.28	-
c134001_g3	118.38	96	105.78	60.76	57.55	52.46	126.63	93.13	89.13	gi|763742850|gb|KJB10349.1| hypothetical protein B456_001G197000 [Gossypium raimondii]
c150224_g1	118.34	77.17	73.63	84.31	70.27	70.41	102.16	73.96	73.5	gi|359489218|ref|XP_002270340.2| PREDICTED: nucleolin [Vitis vinifera] gi|731420520|ref|XP_010661414.1| PREDICTED: nucleolin [Vitis vinifera] gi|297734640|emb|CBI16691.3| unnamed protein product [Vitis vinifera]
c132862_g9	118.12	87.21	89.37	5.91	10.67	4.16	12.04	9.21	7.19	gi|743874147|ref|XP_010906999.1| PREDICTED: uncharacterized protein LOC105033777 isoform X2 [Elaeis guineensis]
c134249_g1	118.1	109.58	119.74	97.12	84.81	84.3	92.34	92.5	83.77	gi|42565467|gb|AAS21001.1| diadenosine tetraphosphate hydrolase [Hyacinthus orientalis]
c119668_g3	118.1	102.8	106.5	32.6	41.05	35.24	25.69	26.25	21.42	-
c93463_g1	118.05	40.2	40.04	104.81	32.59	31.13	149.23	63.59	63.9	-
c148167_g1	118	109.01	112.78	71.92	69.55	64.51	68.99	70.05	64.85	gi|922367760|ref|XP_013456046.1| AP2-like ethylene-responsive transcription factor [Medicago truncatula] gi|657388078|gb|KEH30077.1| AP2-like ethylene-responsive transcription factor [Medicago truncatula]
c138690_g2	117.93	39.69	37.11	50.75	20.68	19.41	101.43	31.49	31.14	gi|661878291|emb|CDP17951.1| unnamed protein product [Coffea canephora]
c127836_g1	117.91	128.44	146.83	45.63	60.12	54.55	209.16	248.39	240.05	gi|641848796|gb|KDO67672.1| hypothetical protein CISIN_1g0190621mg, partial [Citrus sinensis]
c132640_g6	117.78	52.88	48.6	46.6	19.29	18.55	74.31	28.67	35.86	gi|695064267|ref|XP_009420671.1| PREDICTED: light-inducible protein CPRF2-like [Musa acuminata subsp. malaccensis]
c142887_g3	117.72	105.72	106.56	34.64	28.91	26.64	60.4	51.4	48.35	gi|743857193|ref|XP_010942061.1| PREDICTED: shikimate O-hydroxycinnamoyltransferase [Elaeis guineensis]
c146874_g3	117.66	175.06	184.14	60.87	93.1	92.44	244.99	393.71	401.89	gi|147776317|emb|CAN76468.1| hypothetical protein VITISV_030042 [Vitis vinifera]
c149923_g2	117.61	120.63	112.39	107.95	106.11	100.54	67.06	45.93	62.92	gi|743805879|ref|XP_010927537.1| PREDICTED: serine/threonine-protein kinase AFC2-like [Elaeis guineensis]
c229422_g1	117.57	100.57	111.14	51.69	62.36	60.28	141.82	149.68	141.89	gi|848867404|ref|XP_012834353.1| PREDICTED: small nuclear ribonucleoprotein E-like [Erythranthe guttata]
c146963_g4	117.53	105.53	94.99	97.5	92.5	94.03	182.13	166.13	155.63	gi|763803750|gb|KJB70688.1| hypothetical protein B456_011G087200 [Gossypium raimondii]
c139151_g1	117.4	58.98	58.77	66.35	38.59	34.47	110.29	54.24	51.79	gi|743846612|ref|XP_010938882.1| PREDICTED: polyadenylate-binding protein RBP47B&apos; [Elaeis guineensis]
c78767_g1	117.36	66.61	67.72	219.42	119.13	123.64	81.68	51.95	52.2	gi|743759655|ref|XP_010933163.1| PREDICTED: uncharacterized protein LOC105053612 isoform X2 [Elaeis guineensis]
c33472_g1	117.33	28.07	29.36	43.11	2.63	12.55	60.68	14	11.08	gi|743777599|ref|XP_010919235.1| PREDICTED: F-box protein PP2-A13-like [Elaeis guineensis]
c147025_g3	117.29	102.29	125.38	45.05	50.41	40.05	196.68	159.92	188.68	gi|1035947559|gb|OAY71578.1| 60S ribosomal protein L15 [Ananas comosus]
c150224_g2	117.27	74.75	70.46	83.57	59.83	59.02	135.85	83.45	89.68	gi|672142048|ref|XP_008794874.1| PREDICTED: nucleolin [Phoenix dactylifera] gi|672142050|ref|XP_008794875.1| PREDICTED: nucleolin [Phoenix dactylifera]
c132037_g5	117.22	86.33	94.5	48.29	48.34	52.09	97.15	96.01	92.04	gi|823210714|ref|XP_012438325.1| PREDICTED: probable signal peptidase complex subunit 1 [Gossypium raimondii]
c130126_g1	117.19	102.19	112.37	148.19	143.33	143.19	120.21	115.02	112.21	gi|672168297|ref|XP_008804147.1| PREDICTED: macrophage migration inhibitory factor homolog isoform X1 [Phoenix dactylifera]
c124841_g1	117.13	112.13	111.51	44.68	36.68	20.89	61.7	37.48	54.7	gi|1012215500|ref|XP_015934321.1| PREDICTED: LOW QUALITY PROTEIN: glutamate synthase [NADH], amyloplastic [Arachis duranensis]
c139737_g2	117.13	58.36	56.74	142.83	87.81	89.52	101.22	56.1	52.73	gi|475513032|gb|EMT05564.1| hypothetical protein F775_31860 [Aegilops tauschii]
c150031_g1	117.12	70.79	66.5	97.62	62.51	65.16	324.03	195.99	201.92	gi|1035963267|gb|OAY83796.1| Clathrin light chain 2 [Ananas comosus]
c147631_g1	116.96	144.58	148.2	331.76	509.55	522.2	385.56	517.28	495.6	gi|672178192|ref|XP_008809220.1| PREDICTED: ruBisCO large subunit-binding protein subunit beta, chloroplastic [Phoenix dactylifera]
c143872_g1	116.95	103.17	102	93.07	77.81	105.77	197.18	141.95	153.58	gi|1025028081|ref|XP_016455979.1| PREDICTED: clathrin interactor EPSIN 2-like [Nicotiana tabacum]
c146260_g1	116.95	57.33	53.84	81.37	45	42.42	152.77	67.66	68.9	gi|672142870|ref|XP_008795301.1| PREDICTED: far upstream element-binding protein 2-like isoform X1 [Phoenix dactylifera]
c144989_g1	116.92	71.49	75.05	61.18	54.26	46.05	145.06	94.67	101.32	gi|743854966|ref|XP_010941160.1| PREDICTED: ER membrane protein complex subunit 2-A-like [Elaeis guineensis]
c136637_g1	116.88	101.88	104.1	35.28	38.01	30.28	92.72	79.93	84.72	gi|695004193|ref|XP_009388498.1| PREDICTED: F-box protein At5g46170-like [Musa acuminata subsp. malaccensis]
c138034_g3	116.87	108.35	114.54	86.27	73.96	71.79	108.34	97.67	99.77	gi|672172319|ref|XP_008806245.1| PREDICTED: proteasome subunit beta type-5-like [Phoenix dactylifera]
c141494_g1	116.85	62.36	68.18	32.6	25.56	22.49	86.73	53.94	53.46	gi|1035934880|gb|OAY63849.1| B-box zinc finger protein 22 [Ananas comosus]
c138041_g1	116.83	71.9	71.88	70.98	44.81	48.16	121.57	81.84	89.74	gi|317454936|gb|ADV19264.1| hypothetical protein-like protein [Helleborus orientalis]
c135283_g1	116.78	180.33	182.83	7.92	19.32	20.95	8.11	15.9	15.48	gi|743764974|ref|XP_010912703.1| PREDICTED: putative 12-oxophytodienoate reductase 11 [Elaeis guineensis]
c140693_g1	116.55	100.12	100.17	58.2	53.34	56.01	83.56	82.77	74.91	gi|672201728|ref|XP_008778213.1| PREDICTED: uncharacterized protein LOC103698037 isoform X2 [Phoenix dactylifera]
c150294_g1	116.54	108.54	112.96	104.08	89.08	85.67	96.16	108.16	105.9	gi|743884294|ref|XP_010909646.1| PREDICTED: putative tRNA (cytidine(32)/guanosine(34)-2&apos;-O)-methyltransferase isoform X1 [Elaeis guineensis]
c136920_g1	116.51	63.69	32.86	3008.82	836.51	827.34	525.16	307.08	237.11	-
c132330_g2	116.5	86.53	88.96	93.36	78.57	80.55	121.26	107.01	99.87	gi|1035946730|gb|OAY70994.1| Abscisic acid receptor PYL8 [Ananas comosus]
c143358_g1	116.41	65.46	64.13	34.52	18.68	19.06	65.11	38.13	36.21	-
c129056_g1	116.4	1360.09	1336.35	3.02	45.59	47.21	13.81	168.59	161.74	-
c101446_g1	116.33	104.33	113.88	13.46	8.46	10.47	39.79	23.79	26.02	gi|743807300|ref|XP_010928061.1| PREDICTED: probable E3 ubiquitin-protein ligase XERICO [Elaeis guineensis]
c139001_g1	116.26	36.9	41.23	55.27	17.91	24.12	94.86	27.13	41.52	gi|743824247|ref|XP_010932732.1| PREDICTED: uncharacterized protein LOC105053331 [Elaeis guineensis]
c143478_g3	116.24	101.24	111.9	39.64	37.12	34.64	89.82	81.79	81.82	gi|695047484|ref|XP_009411622.1| PREDICTED: probable enoyl-CoA hydratase, mitochondrial [Musa acuminata subsp. malaccensis]
c144239_g4	116.24	67.63	64.24	68.71	43.37	40.66	83.36	38.84	49.17	-
c132336_g1	116.24	78.63	75.8	42.33	29.36	28.96	86.03	58.54	56.4	gi|672160300|ref|XP_008799927.1| PREDICTED: probable splicing factor 3A subunit 1 isoform X1 [Phoenix dactylifera]
c113749_g1	116.21	106.67	82.21	46.94	37.94	56.15	161.54	130.47	175.54	gi|1035934895|gb|OAY63864.1| La-related protein 6B [Ananas comosus]
c137358_g1	116.19	19.06	15.1	85.79	31.98	14.38	62.65	2.44	23.62	-
c148795_g2	116.17	104.17	102.58	62.1	54.98	54.1	104.52	95.52	92.01	gi|731911349|gb|AIZ68195.1| eukaryotic translation initiation factor isoform 4G-1 [Ornithogalum longebracteatum]
c129833_g1	116.17	16.08	20.91	1741.74	196.14	218.41	222.41	22.32	36.23	-
c136903_g1	116.13	58.07	60.56	66.06	34.62	35.17	111.12	50.3	51.17	gi|672144777|ref|XP_008796291.1| PREDICTED: 60S ribosomal export protein NMD3 [Phoenix dactylifera]
c149526_g3	116.07	42.43	22.63	40.24	14.81	3.06	119.08	7.52	7.33	gi|697102599|ref|XP_009601943.1| PREDICTED: zinc finger CCCH domain-containing protein 17 [Nicotiana tomentosiformis]
c252297_g1	116.03	10.01	12.87	0	0	0	0	0	0	-
c140583_g2	115.97	52.57	64.51	63.32	25.93	29.45	104.5	47.65	62.3	gi|719966852|ref|XP_010260125.1| PREDICTED: mitochondrial import receptor subunit TOM5 homolog [Nelumbo nucifera]
c119254_g1	115.97	63.33	72.58	74.2	53.25	48.82	122.18	79.45	75.72	gi|672112043|ref|XP_008803766.1| PREDICTED: protein BPS1, chloroplastic-like [Phoenix dactylifera]
c135906_g1	115.95	132.14	129.84	16.55	22.96	23.01	36.54	48.51	42.24	gi|672117302|ref|XP_008781833.1| PREDICTED: plasma membrane ATPase 4 [Phoenix dactylifera] gi|672117304|ref|XP_008781834.1| PREDICTED: plasma membrane ATPase 4 [Phoenix dactylifera]
c148405_g1	115.95	256.72	252.04	2.86	11.31	11.19	18.45	51.47	49.84	gi|672167936|ref|XP_008803948.1| PREDICTED: probable metal-nicotianamine transporter YSL9 [Phoenix dactylifera] gi|672167938|ref|XP_008803949.1| PREDICTED: probable metal-nicotianamine transporter YSL9 [Phoenix dactylifera]
c148170_g2	115.88	103.88	121.05	2.18	0.97	3.19	3.44	2.56	2.03	-
c149766_g1	115.83	110.83	113.37	102.38	94.38	90.81	233.21	222.75	226.21	gi|672131429|ref|XP_008789275.1| PREDICTED: cleavage and polyadenylation specificity factor subunit 3-II [Phoenix dactylifera]
c147486_g3	115.81	113.22	112.6	96.87	82.87	83.79	85.64	81.87	79.39	gi|743880702|ref|XP_010908708.1| PREDICTED: uncharacterized protein LOC105035016 [Elaeis guineensis]
c149415_g1	115.79	41.62	43.05	109.83	61.81	56.63	240.23	74.52	76.48	gi|743761649|ref|XP_010943312.1| PREDICTED: uncharacterized protein LOC105061065 [Elaeis guineensis]
c29064_g1	115.74	30.61	26.63	24.55	14.82	9.27	46.78	23.67	14.66	-
c144635_g3	115.64	23.44	25.1	74.02	18.67	19.3	141.65	31.54	32.74	-
c110526_g1	115.56	88.71	90.56	84.44	67.57	49.44	152.94	127.94	124.71	gi|225440584|ref|XP_002277272.1| PREDICTED: 60S ribosomal protein L35a-1 [Vitis vinifera] gi|225449234|ref|XP_002280039.1| PREDICTED: 60S ribosomal protein L35a-1 [Vitis vinifera] gi|147823354|emb|CAN64195.1| hypothetical protein VITISV_014336 [Vitis vinifera] gi|296086107|emb|CBI31548.3| unnamed protein product [Vitis vinifera] gi|297740261|emb|CBI30443.3| unnamed protein product [Vitis vinifera]
c130202_g1	115.54	107.02	114.71	82.02	69.71	61.19	135.64	124.7	127.07	gi|695052254|ref|XP_009414180.1| PREDICTED: acyl carrier protein 2, mitochondrial-like [Musa acuminata subsp. malaccensis]
c150126_g1	115.47	103.47	114.23	59.7	54.7	49.87	102.82	86.82	74.56	gi|475527924|gb|EMT07556.1| hypothetical protein F775_11805 [Aegilops tauschii]
c139491_g1	115.42	106.44	110.2	98.33	83.11	90.92	172.66	164.1	168.52	gi|1026104215|ref|XP_016551149.1| PREDICTED: homeobox-leucine zipper protein ATHB-6-like [Capsicum annuum]
c148950_g3	115.3	100.3	99.49	133.63	119.24	128.63	164.13	152.2	156.13	gi|672186080|ref|XP_008812993.1| PREDICTED: alcohol dehydrogenase class-3-like [Phoenix dactylifera]
c21018_g1	115.21	31.08	46.43	51.41	30.1	29.61	96.54	43.98	31.38	gi|703115145|ref|XP_010100827.1| hypothetical protein L484_000119 [Morus notabilis] gi|587959596|gb|EXC45032.1| hypothetical protein L484_000119 [Morus notabilis]
c112984_g1	115.19	37.5	39.56	75.02	23.31	22.96	143.71	55.14	49.93	gi|672143518|ref|XP_008795641.1| PREDICTED: uncharacterized protein LOC103711319 [Phoenix dactylifera]
c150108_g3	115.18	148.81	153.84	111.49	187.63	196.69	226.45	351.44	341.37	gi|743870715|ref|XP_010906116.1| PREDICTED: probable cellulose synthase A catalytic subunit 8 [UDP-forming] [Elaeis guineensis] gi|743870719|ref|XP_010906117.1| PREDICTED: probable cellulose synthase A catalytic subunit 8 [UDP-forming] [Elaeis guineensis]
c66116_g1	115.17	65.09	55.71	23.21	5.91	12.26	44.79	40.35	51.39	-
c143495_g2	115.14	45.18	47.05	55.12	22.35	23.94	92.79	40.95	40.44	gi|1035929773|gb|OAY59359.1| hypothetical protein MANES_01G026600 [Manihot esculenta]
c142090_g3	115.06	82.59	93.06	77.78	71.97	65.78	7.77	6.51	8.88	-
c131305_g2	115.05	58.72	59.66	187.39	111.59	107.23	225.97	144.87	139.75	gi|727604548|ref|XP_010475326.1| PREDICTED: probable fructokinase-2 [Camelina sativa]
c102455_g1	115.04	103.35	112.74	35.01	59.3	50.92	63.18	69.56	60.93	gi|388514741|gb|AFK45432.1| unknown [Lotus japonicus]
c146344_g2	115.02	53.44	61.33	68.42	28.3	31	230.24	117.87	114.81	gi|672132371|ref|XP_008789769.1| PREDICTED: uncharacterized protein LOC103707160 [Phoenix dactylifera]
c147918_g2	114.79	121.67	126.62	104.34	131.89	124.71	91.97	90.69	95.9	gi|672200955|ref|XP_008778009.1| PREDICTED: alanine--tRNA ligase-like [Phoenix dactylifera] gi|672200959|ref|XP_008778010.1| PREDICTED: alanine--tRNA ligase-like [Phoenix dactylifera] gi|672200963|ref|XP_008778012.1| PREDICTED: alanine--tRNA ligase-like [Phoenix dactylifera] gi|672200967|ref|XP_008778013.1| PREDICTED: alanine--tRNA ligase-like [Phoenix dactylifera] gi|672200971|ref|XP_008778014.1…
c150362_g1	114.77	118.85	131.37	65.77	99.77	78.81	115.4	130.35	150.9	gi|672202690|ref|XP_008778448.1| PREDICTED: splicing factor U2af large subunit B-like [Phoenix dactylifera] gi|672202947|ref|XP_008778517.1| PREDICTED: splicing factor U2af large subunit B-like [Phoenix dactylifera]
c89025_g1	114.71	41.18	53.08	0.29	0	0.7	0.44	0	0.49	-
c136729_g2	114.63	51.11	53.73	76.19	42.66	40.21	258.93	130.85	134.21	gi|694365265|ref|XP_009361526.1| PREDICTED: uncharacterized protein LOC103951796 [Pyrus x bretschneideri] gi|694365268|ref|XP_009361527.1| PREDICTED: uncharacterized protein LOC103951796 [Pyrus x bretschneideri]
c141848_g1	114.49	165.03	165.58	57.28	100.68	103.22	100.74	163.7	163.74	gi|586700164|ref|XP_006844752.1| PREDICTED: casein kinase II subunit beta isoform X1 [Amborella trichopoda] gi|769811827|ref|XP_011623504.1| PREDICTED: casein kinase II subunit beta isoform X1 [Amborella trichopoda] gi|548847223|gb|ERN06427.1| hypothetical protein AMTR_s00016p00256100 [Amborella trichopoda]
c136222_g1	114.45	304.73	294.48	58.5	192.34	182.82	167.77	435.08	453.82	gi|1035958253|gb|OAY79539.1| 40S ribosomal protein S3a [Ananas comosus]
c141937_g4	114.42	148.5	143.01	10.76	18.42	17.79	46.11	61.03	57.9	gi|743810121|ref|XP_010928804.1| PREDICTED: xylem cysteine proteinase 1-like [Elaeis guineensis]
c134475_g1	114.38	33.76	40.11	67.82	28.74	22.63	81.25	27.7	26.81	gi|743799079|ref|XP_010925393.1| PREDICTED: protein CLP1 homolog isoform X2 [Elaeis guineensis]
c144672_g2	114.37	99.37	99.63	60	58.53	55	101.93	95.32	93.93	gi|116519148|gb|ABJ99596.1| pyruvate decarboxylase [Lycoris aurea]
c138942_g4	114.22	72.64	84.49	76.48	57.97	68.13	70.76	54.91	48.71	gi|319996466|dbj|BAJ61942.1| ubiquitin [Nymphaea hybrid cultivar]
c148771_g3	114.2	35	35.49	65.13	18.5	20.08	100.54	28.42	23.99	gi|743769701|ref|XP_010915141.1| PREDICTED: glutamine--tRNA ligase-like [Elaeis guineensis]
c139069_g4	114.16	45.47	52.16	52.23	29.89	24.69	11.48	5.07	5.45	gi|743761861|ref|XP_010905201.1| PREDICTED: formimidoyltransferase-cyclodeaminase-like [Elaeis guineensis]
c150003_g1	114.13	106.13	106.83	62.12	47.12	52.07	98.86	110.86	105.9	gi|743833145|ref|XP_010935180.1| PREDICTED: DNA-directed RNA polymerase II subunit 1 [Elaeis guineensis]
c146083_g1	114.09	62.73	63.4	75.81	40.97	32.1	107.47	61.32	76.13	gi|672195720|ref|XP_008776617.1| PREDICTED: dynactin subunit 1 [Phoenix dactylifera]
c132330_g1	114.07	17.5	22.64	51.05	10.69	7.34	90.8	22.43	22.27	gi|695045973|ref|XP_009410795.1| PREDICTED: protein transport protein Sec61 subunit beta-like [Musa acuminata subsp. malaccensis]
c259189_g1	113.97	98.2	95.97	80.51	75.51	75.19	177.43	165.74	159.43	gi|823227110|ref|XP_012446386.1| PREDICTED: 60S acidic ribosomal protein P3 [Gossypium raimondii] gi|728807322|gb|KHF97508.1| 60S acidic ribosomal P3 [Gossypium arboreum] gi|763786758|gb|KJB53754.1| hypothetical protein B456_009G003400 [Gossypium raimondii]
c143276_g5	113.95	48.28	52.05	3.64	2.68	2.95	12.91	5.81	6.96	gi|695054379|ref|XP_009415318.1| PREDICTED: homeobox-leucine zipper protein HOX19-like [Musa acuminata subsp. malaccensis]
c145723_g2	113.93	105.41	95.77	97.71	85.4	79.26	113.95	99.22	105.38	gi|1035898061|gb|OAY27662.1| hypothetical protein MANES_15G005200 [Manihot esculenta]
c146282_g3	113.76	157.76	164.64	57.99	94.54	92.32	73.1	108.47	114.8	gi|769807448|ref|XP_011624653.1| PREDICTED: eukaryotic initiation factor 4A-3 [Amborella trichopoda]
c132796_g1	113.57	88.86	88.57	36.69	1.73	1.69	30.77	5.77	6.3	gi|672119241|ref|XP_008782853.1| PREDICTED: LOW QUALITY PROTEIN: 11 kDa late embryogenesis abundant protein [Phoenix dactylifera]
c136746_g1	113.56	40.62	40.13	46.44	16.13	14.87	55.98	23.09	29.15	gi|743827298|ref|XP_010933554.1| PREDICTED: uncharacterized protein LOC105053912 [Elaeis guineensis]
c149361_g2	113.52	16.78	14.05	48.04	10.89	2.3	114.68	20.89	24.96	-
c141407_g1	113.44	178.92	189.6	61.15	122.47	118.61	155.53	267.3	255.66	gi|720084367|ref|XP_010243187.1| PREDICTED: RNA-binding protein Nova-2-like isoform X3 [Nelumbo nucifera]
c139978_g3	113.38	63.96	68.47	121.55	94.9	80.2	179.96	123.95	108.27	gi|659091520|ref|XP_008446589.1| PREDICTED: uncharacterized protein LOC103489276 [Cucumis melo]
c134843_g1	113.38	61.11	53.29	98.74	45.05	41.99	151.04	80.85	80.34	gi|703152738|ref|XP_010110500.1| hypothetical protein L484_023332 [Morus notabilis] gi|587940097|gb|EXC26718.1| hypothetical protein L484_023332 [Morus notabilis]
c159652_g1	113.32	101.32	133.57	48.91	43.91	41.45	152.06	136.06	115.54	gi|566214658|ref|XP_006371993.1| cytidine deaminase 1 family protein [Populus trichocarpa] gi|550318239|gb|ERP49790.1| cytidine deaminase 1 family protein [Populus trichocarpa]
c147675_g3	113.3	42.1	47.92	28.09	16.51	15.75	40.68	27.55	26.61	gi|703063178|ref|XP_010086901.1| Zinc finger CCCH domain-containing protein 49 [Morus notabilis] gi|587833887|gb|EXB24692.1| Zinc finger CCCH domain-containing protein 49 [Morus notabilis]
c140890_g3	113.21	101.21	100.68	78.17	65.18	70.17	191.51	182.51	175.7	gi|643740333|gb|KDP45992.1| hypothetical protein JCGZ_11895 [Jatropha curcas]
c133595_g1	113.21	47.2	46.66	56.68	26.45	26.09	108.64	49.42	46.65	gi|672158492|ref|XP_008798990.1| PREDICTED: probable pectinesterase/pectinesterase inhibitor 51 [Phoenix dactylifera]
c142567_g3	112.93	147.13	87.93	78.23	38.97	43.23	62.13	45.12	54.6	gi|442803210|gb|AGC78945.1| hypothetical protein (mitochondrion) [Vicia faba]
c63581_g1	112.92	53.49	60.69	34.38	17.52	22.48	43.32	34.68	32.72	gi|720039120|ref|XP_010268203.1| PREDICTED: uncharacterized protein LOC104605228 [Nelumbo nucifera]
c134694_g1	112.91	81.89	87.91	68.17	36.68	33.17	115.91	90.91	102.04	gi|413925723|gb|AFW65655.1| hypothetical protein ZEAMMB73_337013 [Zea mays]
c101435_g1	112.81	60.18	67.9	60.93	34.32	35.44	170.61	83.52	90.11	gi|147769054|emb|CAN65703.1| hypothetical protein VITISV_031282 [Vitis vinifera]
c129278_g1	112.8	118.25	119.93	74.88	88.08	83.09	102.32	116.29	120.9	gi|514762742|ref|XP_004965102.1| PREDICTED: protein CREG1 [Setaria italica] gi|944245807|gb|KQL10101.1| hypothetical protein SETIT_007287mg [Setaria italica]
c148627_g4	112.78	84.43	87.78	118.06	83.86	83.06	138.02	113.02	110.53	-
c148253_g3	112.78	123.89	126.89	22.77	37.37	36.84	18.28	18.57	18.36	gi|743829954|ref|XP_010934290.1| PREDICTED: long-chain-alcohol oxidase FAO2-like [Elaeis guineensis]
c138564_g4	112.76	83.67	85.17	34.48	28.83	42.74	35.88	33.08	18.16	gi|1029014395|ref|XP_016671073.1| PREDICTED: auxin transporter-like protein 2 [Gossypium hirsutum]
c136409_g3	112.7	34.14	38.76	22.13	5.83	6.83	18.16	9.39	6.43	gi|720003582|ref|XP_010257037.1| PREDICTED: abscisic acid receptor PYL4 [Nelumbo nucifera]
c129428_g1	112.5	60.45	65.36	198.62	137.61	141.62	63.37	42.61	42.58	gi|672201200|ref|XP_008778075.1| PREDICTED: LOW QUALITY PROTEIN: geraniol 8-hydroxylase-like [Phoenix dactylifera]
c142825_g3	112.48	103.96	106.5	86.76	74.45	78.06	76.48	65.48	67.91	gi|672192446|ref|XP_008775767.1| PREDICTED: uncharacterized protein LOC103696045 isoform X1 [Phoenix dactylifera]
c133619_g1	112.38	140.66	109.17	24.03	20.05	15.74	205.28	174.14	199.03	gi|747087516|ref|XP_011091303.1| PREDICTED: protein LIGHT-DEPENDENT SHORT HYPOCOTYLS 4 [Sesamum indicum]
c147248_g1	112.34	69.9	70.19	203.51	123.55	122.87	7.46	3.58	3.72	gi|371721804|gb|AEX55225.1| sugar transporter [Allium sativum]
c142228_g1	112.3	55.28	55.61	32.81	21.1	20.02	63.33	32.56	34.38	gi|743867143|ref|XP_010905239.1| PREDICTED: LOW QUALITY PROTEIN: 4-coumarate--CoA ligase-like 4 [Elaeis guineensis]
c142694_g1	112.29	125.5	131.24	125.63	160.96	160.07	134.02	176.62	178.55	gi|743774123|ref|XP_010917415.1| PREDICTED: dnaJ homolog subfamily B member 6-like isoform X1 [Elaeis guineensis]
c138793_g3	112.24	120.92	129.69	0.23	1.98	1.5	0.24	1.68	1.51	gi|1035933910|gb|OAY62979.1| putative flavin-containing monooxygenase 1 [Ananas comosus]
c109034_g1	112.23	38.52	37.86	80.91	46.8	29.35	115.33	23.45	34.23	gi|18491032|gb|AAL68970.1| serine/threonine protein kinase SRPK1 [Elaeis oleifera]
c142850_g1	112.18	97.18	102.91	91.68	72.46	86.68	109.79	89.64	101.79	gi|672134139|ref|XP_008790714.1| PREDICTED: zinc finger protein CONSTANS-LIKE 14-like [Phoenix dactylifera]
c128925_g1	112.17	73.8	65.19	23.69	13.26	14.57	116.75	73.55	78.48	gi|743829021|ref|XP_010934034.1| PREDICTED: cyclic nucleotide-gated cation channel beta-1 [Elaeis guineensis]
c141908_g1	112.16	65.39	64.63	77.37	50.05	54.74	89.92	54.73	49.83	gi|695040890|ref|XP_009408038.1| PREDICTED: homeobox protein knotted-1-like 13 [Musa acuminata subsp. malaccensis]
c142469_g3	112.11	100.11	99.42	43.18	38.18	39.64	72.9	56.9	64.74	gi|586686652|ref|XP_006841988.1| PREDICTED: uncharacterized protein At2g23090 [Amborella trichopoda] gi|548844025|gb|ERN03663.1| hypothetical protein AMTR_s00144p00063280 [Amborella trichopoda]
c127713_g2	112.08	32.35	34.77	157.25	60.87	55.2	204.73	72.25	64.03	gi|672176026|ref|XP_008808076.1| PREDICTED: uncharacterized protein LOC103720244 [Phoenix dactylifera]
c142786_g2	112.04	72.25	70.85	51.51	27.36	28.32	65.6	49.5	43.57	gi|672150093|ref|XP_008797321.1| PREDICTED: L-type lectin-domain containing receptor kinase S.4-like [Phoenix dactylifera]
c134852_g1	111.93	99.13	106.71	39.01	31.82	31.6	85.82	95.46	81.68	gi|955345548|ref|XP_003535891.2| PREDICTED: probable calcium-binding protein CML49 [Glycine max] gi|947084480|gb|KRH33201.1| hypothetical protein GLYMA_10G106400 [Glycine max]
c126961_g2	111.93	78.47	78.91	39.72	30.2	32.86	90.69	66.57	66.19	gi|1009133094|ref|XP_015883720.1| PREDICTED: calmodulin [Ziziphus jujuba]
c150640_g2	111.91	106.91	111.35	45.65	37.65	45.61	49.39	44.97	42.39	gi|596005122|ref|XP_007218347.1| hypothetical protein PRUPE_ppa008681mg [Prunus persica] gi|462414809|gb|EMJ19546.1| hypothetical protein PRUPE_ppa008681mg [Prunus persica]
c133434_g1	111.88	103.36	98.14	59.81	47.5	44.82	142.36	136.98	133.79	gi|695041725|ref|XP_009408479.1| PREDICTED: poly(rC)-binding protein 1-like [Musa acuminata subsp. malaccensis]
c139608_g2	111.87	94	95.07	139.87	130.15	128.54	212.06	170.44	180.2	gi|695057748|ref|XP_009417164.1| PREDICTED: mavicyanin [Musa acuminata subsp. malaccensis]
c141452_g4	111.84	53.14	60.1	69.59	33.55	31.66	102.09	43.87	48.7	gi|720006595|ref|XP_010258033.1| PREDICTED: uncharacterized protein LOC104597932 [Nelumbo nucifera]
c138619_g1	111.79	141.04	150.57	37.15	67.51	62.59	28.53	46.79	42.86	gi|81051963|gb|ABB55317.1| zinc transporter, putative [Asparagus officinalis]
c136071_g2	111.76	99.76	95.71	138.5	133.5	135.31	153.93	137.93	143.98	gi|1035965255|gb|OAY85554.1| Chaperone protein DnaJ [Ananas comosus]
c142274_g3	111.76	40.18	46.76	95.45	36.12	33.96	307.51	128.13	128.65	gi|672111791|ref|XP_008802513.1| PREDICTED: uncharacterized protein LOC103716332 [Phoenix dactylifera]
c148563_g1	111.67	330.11	343.37	41.56	164.7	181.22	64.72	269.38	249.13	gi|700252997|gb|AIU48122.1| structural maintenance of chromosomes protein 1, partial [Asparagus officinalis]
c147462_g2	111.63	102.38	103.44	43.05	46.66	48.08	81.69	75.07	76.01	gi|743822313|ref|XP_010932245.1| PREDICTED: DEAD-box ATP-dependent RNA helicase 20-like [Elaeis guineensis]
c148319_g6	111.56	38.83	49.71	31.77	17.35	13.14	42.98	19.21	19.84	gi|672184453|ref|XP_008812537.1| PREDICTED: citrate synthase, glyoxysomal [Phoenix dactylifera]
c129018_g1	111.55	129.98	131.69	0.31	0	0.18	2.83	4.45	3.75	gi|255566943|ref|XP_002524454.1| PREDICTED: early nodulin-93 [Ricinus communis] gi|223536242|gb|EEF37894.1| Early nodulin, putative [Ricinus communis]
c136277_g1	111.53	152.06	159.41	115.2	115.35	123.2	138.91	103.91	104.71	gi|670399661|ref|XP_008679754.1| PREDICTED: ubiquitin-conjugating enzyme E2 variant 1C [Zea mays] gi|670399663|ref|XP_008679755.1| PREDICTED: ubiquitin-conjugating enzyme E2 variant 1C [Zea mays] gi|195606712|gb|ACG25186.1| ubiquitin-conjugating enzyme spm2 [Zea mays] gi|195606916|gb|ACG25288.1| ubiquitin-conjugating enzyme spm2 [Zea mays] gi|195618108|gb|ACG30884.1| ubiquitin-conjugating enzyme …
c136429_g1	111.51	114.04	119.9	18.9	54.79	65.14	51.07	96.24	108.77	gi|147819070|emb|CAN74125.1| hypothetical protein VITISV_038770 [Vitis vinifera]
c143993_g8	111.49	24.08	17.59	55.75	9.87	9.48	79.41	10.59	13.25	gi|743777137|ref|XP_010918987.1| PREDICTED: transcription initiation factor IIF subunit beta-like [Elaeis guineensis]
c132980_g2	111.46	130.98	136.37	54.08	67.46	65.77	173.97	216.33	214.43	gi|502103333|ref|XP_004492257.1| PREDICTED: 60S ribosomal protein L32-1-like [Cicer arietinum]
c145343_g1	111.38	68.98	76.47	78.6	55.52	56.72	172.93	101.04	107.54	gi|743890434|ref|XP_010911081.1| PREDICTED: putative clathrin assembly protein At2g25430 [Elaeis guineensis]
c149586_g6	111.35	56.32	54.48	51.21	22.93	33.85	86.37	41.3	53.77	gi|1035942948|gb|OAY68457.1| La-related protein 1A [Ananas comosus]
c146565_g3	111.35	70.11	73.97	19.39	14.31	15.64	34.3	23.94	23.69	gi|743810700|ref|XP_010928964.1| PREDICTED: uncharacterized protein LOC105050579 [Elaeis guineensis]
c112349_g1	111.34	85.72	86.34	60.73	24.69	25.73	94.07	69.07	65.73	gi|700253550|gb|AIU48398.1| pollen Ole e 1 allergen and extensin family protein, partial [Asparagus officinalis]
c146723_g1	111.34	69.59	69.26	59.26	37.59	37.36	618.34	395.17	409.93	gi|672117658|ref|XP_008782021.1| PREDICTED: protein ASPARTIC PROTEASE IN GUARD CELL 2-like [Phoenix dactylifera]
c121653_g1	111.33	96.37	106.76	107.01	85.94	94.65	297.34	228.2	224.16	gi|747089038|ref|XP_011092140.1| PREDICTED: calreticulin [Sesamum indicum] gi|747108149|ref|XP_011069385.1| PREDICTED: calreticulin [Sesamum indicum]
c139684_g1	111.26	99.26	106.29	61.9	58.57	53.9	33.08	24.08	24.24	-
c136375_g1	111.2	72.72	71.18	54.01	40.72	40.04	89.75	59.86	61.76	-
c132235_g2	111.09	39.68	35.9	108.9	35.44	33.08	136.73	44.48	49.39	gi|1021042279|gb|KZN00060.1| hypothetical protein DCAR_008814 [Daucus carota subsp. sativus]
c149849_g2	111.07	474.58	565.38	73.95	377.14	334.54	82.76	390.81	395.5	-
c130128_g3	111	68.13	72.63	64.96	63.47	36	127.59	93	45.53	-
c145340_g2	110.99	69.44	14.69	2899.08	732.94	730.27	304.8	209.76	243.1	gi|57013942|ref|YP_173415.1| hypothetical protein NitaMp073 [Nicotiana tabacum] gi|56806578|dbj|BAD83479.1| hypothetical protein (mitochondrion) [Nicotiana tabacum]
c145302_g5	110.96	479.89	493.11	2.81	19.3	17.47	13.71	78.82	69.46	gi|743878559|ref|XP_010908203.1| PREDICTED: uncharacterized protein LOC105034663 [Elaeis guineensis]
c141582_g5	110.89	63.86	59.95	56.44	31.69	30.85	105.3	61.52	65.01	gi|743877220|ref|XP_010907841.1| PREDICTED: protein MODIFIER OF SNC1 11-like [Elaeis guineensis] gi|743877222|ref|XP_010907842.1| PREDICTED: protein MODIFIER OF SNC1 11-like [Elaeis guineensis]
c141883_g1	110.83	87.77	88.52	71.89	57.83	59.38	104.04	85.94	80.94	gi|743844449|ref|XP_010938348.1| PREDICTED: fumarate hydratase 1, mitochondrial [Elaeis guineensis]
c144218_g1	110.76	111.1	122.06	27.97	36.67	36.06	18.64	20.96	22.51	gi|1035948590|gb|OAY72331.1| SPX domain-containing protein 1 [Ananas comosus]
c130722_g1	110.73	52.67	46.3	362.52	159.93	164.57	241.71	114.61	110.49	gi|144226181|dbj|BAF56180.1| glutathione S-transferase [Allium cepa]
c142535_g5	110.68	29.45	29.12	78.74	28.17	27.12	110.92	30.36	27.77	-
c132886_g1	110.66	53.65	56.19	56.37	28.68	27.67	108.24	53.57	49.23	gi|672197047|ref|XP_008776970.1| PREDICTED: cytochrome b-c1 complex subunit Rieske-4, mitochondrial-like [Phoenix dactylifera]
c137141_g1	110.64	56.51	58.54	58.44	35.63	35.44	72	42.36	39.77	gi|743856115|ref|XP_010941763.1| PREDICTED: LOW QUALITY PROTEIN: NPL4-like protein [Elaeis guineensis]
c149712_g7	110.63	15.7	21.36	94.22	9.39	10.78	354.7	64.29	70.06	gi|47026963|gb|AAT08700.1| pollen-specific protein [Hyacinthus orientalis]
c146732_g8	110.61	142.36	151.24	83.28	91.45	89.8	157.92	156.5	169.66	gi|672142206|ref|XP_008794958.1| PREDICTED: proteasome subunit alpha type-4 [Phoenix dactylifera] gi|672142208|ref|XP_008794959.1| PREDICTED: proteasome subunit alpha type-4 [Phoenix dactylifera] gi|672142210|ref|XP_008794960.1| PREDICTED: proteasome subunit alpha type-4 [Phoenix dactylifera]
c123819_g1	110.58	47.53	41.85	63.51	30.99	27.44	86.67	41.86	32.59	gi|747041268|ref|XP_011072158.1| PREDICTED: ribosomal RNA processing protein 36 homolog [Sesamum indicum]
c136774_g1	110.48	40.98	44.97	43.32	16.88	18.36	61.23	32.03	29.42	gi|336478151|gb|AEI60128.1| microsomal delta-12 oleate desaturase [Vitis labrusca]
c129675_g1	110.41	84.2	85.41	363.45	325.71	328.45	56.02	31.02	30.1	-
c143190_g4	110.41	62.97	63.76	93.48	57.59	50.65	121.21	69.55	70.84	-
c152261_g1	110.35	76.36	73.34	0.1	0	0	0.1	0.48	0	gi|672189927|ref|XP_008775111.1| PREDICTED: non-specific lipid transfer protein GPI-anchored 2-like [Phoenix dactylifera]
c125481_g1	110.28	203.45	221.07	63.73	133.89	127.95	47.9	82.02	77.17	gi|743824948|ref|XP_010932911.1| PREDICTED: BEL1-like homeodomain protein 7 [Elaeis guineensis]
c134020_g1	110.25	98.25	96.57	45.51	36.32	37.51	101.4	92.4	90.52	gi|720003633|ref|XP_010257055.1| PREDICTED: eukaryotic translation initiation factor 2 subunit alpha-like [Nelumbo nucifera]
c134390_g1	110.18	87.82	85.18	163.16	123.63	128.16	571.48	546.48	552.53	gi|743779267|ref|XP_010920097.1| PREDICTED: probable aquaporin PIP2-6 [Elaeis guineensis]
c142151_g2	110.17	80.33	82.83	62.51	66.86	59.44	152.91	133.22	140.89	gi|672189725|ref|XP_008775062.1| PREDICTED: pentatricopeptide repeat-containing protein At3g09060 [Phoenix dactylifera] gi|672189729|ref|XP_008775063.1| PREDICTED: pentatricopeptide repeat-containing protein At3g09060 [Phoenix dactylifera] gi|672189745|ref|XP_008775065.1| PREDICTED: pentatricopeptide repeat-containing protein At3g09060 [Phoenix dactylifera]
c136712_g5	109.97	56.61	62.87	92.23	54.63	50.56	183.26	91.19	89.4	gi|672120424|ref|XP_008783477.1| PREDICTED: glucan endo-1,3-beta-glucosidase 7 [Phoenix dactylifera]
c132836_g2	109.96	104.96	118.77	90.4	82.4	82.8	165.54	146.46	158.54	gi|672163561|ref|XP_008801634.1| PREDICTED: eukaryotic translation initiation factor 3 subunit G-like [Phoenix dactylifera]
c139865_g5	109.95	44.08	44.46	70.03	28.67	31.53	129.06	52.05	53.9	gi|695034361|ref|XP_009404688.1| PREDICTED: UBP1-associated protein 2B-like [Musa acuminata subsp. malaccensis] gi|695034363|ref|XP_009404689.1| PREDICTED: UBP1-associated protein 2B-like [Musa acuminata subsp. malaccensis]
c142469_g2	109.94	54.43	59.51	63.25	27.21	30.66	93.28	51.87	55.84	gi|657949019|ref|XP_008340878.1| PREDICTED: uncharacterized protein At2g23090-like [Malus domestica]
c133390_g3	109.93	97.93	112.22	95.38	90.38	95.29	239.83	223.83	222.06	gi|976926951|gb|KVI10790.1| Ribosomal protein S5 domain 2-type fold [Cynara cardunculus var. scolymus]
c142487_g1	109.93	224.35	220.65	120.05	279.09	283.26	75.03	161.29	178.49	gi|28566348|gb|AAO43186.1| S-adenosylmethionine decarboxylase [Narcissus pseudonarcissus]
c138616_g1	109.82	53.63	56.15	125.57	67.18	69.3	225.66	107.19	106.44	gi|743819495|ref|XP_010931549.1| PREDICTED: probable sugar phosphate/phosphate translocator At4g32390 [Elaeis guineensis]
c139160_g1	109.8	231.01	226.73	80.83	232.77	235.32	46.82	131.8	131.97	gi|743792800|ref|XP_010923771.1| PREDICTED: actin-depolymerizing factor-like isoform X2 [Elaeis guineensis]
c111407_g1	109.79	111.77	120.11	82.54	89.07	90.54	99.88	64.88	68.21	gi|743780680|ref|XP_010920575.1| PREDICTED: protein IWS1 homolog isoform X2 [Elaeis guineensis]
c130592_g1	109.77	103.47	104.55	62.38	57.32	54.97	107.93	102.88	103.79	gi|743897285|ref|XP_011041931.1| PREDICTED: PERQ amino acid-rich with GYF domain-containing protein 2-like isoform X3 [Populus euphratica]
c116508_g1	109.68	94.68	98.04	286.33	257.13	281.33	249.15	224.74	241.15	-
c134912_g1	109.64	172.62	180.76	54.07	125.72	133.36	48.79	89.09	74.32	gi|388498966|gb|AFK37549.1| unknown [Lotus japonicus]
c113683_g1	109.6	26.51	25.56	85.6	21.51	25.18	212.94	64.69	55.12	gi|731319968|ref|XP_010670553.1| PREDICTED: 40S ribosomal protein S30 [Beta vulgaris subsp. vulgaris] gi|731325048|ref|XP_010673301.1| PREDICTED: 40S ribosomal protein S30 [Beta vulgaris subsp. vulgaris] gi|870863848|gb|KMT14995.1| hypothetical protein BVRB_3g064990 [Beta vulgaris subsp. vulgaris] gi|870865975|gb|KMT17004.1| hypothetical protein BVRB_2g042070 [Beta vulgaris subsp. vulgaris]
c113174_g1	109.53	73.98	62.12	131.58	79.03	74.2	42.16	22.9	14.84	gi|743789102|ref|XP_010922835.1| PREDICTED: uncharacterized protein LOC105046047 [Elaeis guineensis]
c110259_g1	109.49	218.46	218.77	0.71	7.23	8.24	7.2	5.72	11.53	-
c141415_g3	109.33	95.74	104.11	1565.39	1567.07	1557.98	964.81	963.89	960.67	gi|802685616|ref|XP_012082369.1| PREDICTED: 29 kDa ribonucleoprotein A, chloroplastic [Jatropha curcas] gi|643717678|gb|KDP29121.1| hypothetical protein JCGZ_16510 [Jatropha curcas]
c141262_g1	109.33	106.02	104.11	50.61	38.67	43.2	78.54	69.92	74.4	gi|743785067|ref|XP_010921814.1| PREDICTED: probable histone-arginine methyltransferase CARM1 isoform X1 [Elaeis guineensis]
c144763_g1	109.33	50.26	59.04	37.22	20.47	20.37	66	39.95	45.72	gi|672127685|ref|XP_008787314.1| PREDICTED: protein ROOT PRIMORDIUM DEFECTIVE 1 [Phoenix dactylifera]
c145476_g1	109.31	156.49	151.33	0	0	0	0	0.1	0	gi|695024770|ref|XP_009399613.1| PREDICTED: uncharacterized protein LOC103983971 [Musa acuminata subsp. malaccensis]
c150300_g2	109.3	293.25	308.73	49.72	177.28	175.54	82.82	251.72	256.22	gi|48716409|dbj|BAD23018.1| cation efflux family protein-like [Oryza sativa Japonica Group] gi|50251411|dbj|BAD28449.1| cation efflux family protein-like [Oryza sativa Japonica Group]
c133904_g1	109.21	77.15	64.72	31.95	41.68	41.32	64.02	79.03	48.97	-
c150001_g3	109.2	57.04	58.61	66.07	28.44	23.86	3.76	1.99	2.69	gi|672169465|ref|XP_008804762.1| PREDICTED: UDP-glycosyltransferase 85A2-like [Phoenix dactylifera]
c144141_g2	109.15	61.11	61.08	49.16	32.42	31.82	67.29	48.99	49.52	-
c57203_g1	109.12	24.2	40.37	36.72	7.18	37.16	80.25	62.18	37.12	gi|920707814|gb|KOM49811.1| hypothetical protein LR48_Vigan08g063800 [Vigna angularis] gi|965602548|dbj|BAT89725.1| hypothetical protein VIGAN_06076000 [Vigna angularis var. angularis]
c144030_g2	109.09	47.34	47.13	60.74	28.8	28.22	88.24	34.33	30.51	gi|1027097364|ref|XP_008227610.2| PREDICTED: beta-galactosidase 6 [Prunus mume]
c148744_g1	108.99	54.96	58.66	62.98	32.3	31.67	183.85	102.41	86.34	gi|743757749|ref|XP_010923453.1| PREDICTED: AP2/ERF and B3 domain-containing transcription factor RAV1-like [Elaeis guineensis]
c147713_g1	108.98	413.91	394.81	23.36	104.93	100.85	44.09	146.43	154.99	gi|743755326|ref|XP_010904950.1| PREDICTED: protein ROOT HAIR DEFECTIVE 3-like [Elaeis guineensis]
c142620_g8	108.89	97.42	102.24	51.86	61.5	58.41	113.59	112.55	107.71	gi|672137602|ref|XP_008792530.1| PREDICTED: NAC domain-containing protein 68-like isoform X1 [Phoenix dactylifera]
c150453_g2	108.89	38.46	27.8	83.48	16.84	16.77	108.35	24.08	47.82	gi|728841437|gb|KHG20880.1| Proteasome subunit alpha type-1-B -like protein [Gossypium arboreum]
c136762_g2	108.77	52.89	53.47	100.34	51.72	49.33	236.38	103.52	108.39	gi|743791713|ref|XP_010923506.1| PREDICTED: 60S ribosomal protein L4 [Elaeis guineensis]
c149633_g1	108.76	150.31	148.06	78.64	122.86	131.24	85.67	138.81	123.26	gi|672180250|ref|XP_008810310.1| PREDICTED: proteasome subunit beta type-4-like [Phoenix dactylifera]
c130500_g2	108.73	61.16	61.05	76.49	47.23	48.27	443.76	286.62	279.84	gi|694995050|ref|XP_009412922.1| PREDICTED: probable aquaporin PIP2-6 [Musa acuminata subsp. malaccensis]
c145557_g1	108.71	90.28	89.82	99.34	92.44	87.48	431.5	364.91	370.09	gi|672136056|ref|XP_008791710.1| PREDICTED: 21 kDa protein [Phoenix dactylifera]
c149591_g1	108.69	548.1	557.6	18.78	138.41	132.53	52.52	330.96	319.97	gi|1035944941|gb|OAY69779.1| Cytochrome P450 704C1 [Ananas comosus]
c251939_g1	108.58	14.13	12.25	71.7	10.94	13.72	86.02	9.19	19.4	-
c148196_g2	108.55	96.55	98.79	41.88	36.88	35.87	98.1	82.1	97.14	gi|731910541|gb|AIZ68143.1| PHD finger protein ALFIN-LIKE 3-like isoform X3 [Ornithogalum saundersiae]
c142284_g1	108.54	95.3	105.33	70.33	56.33	51.47	104.54	97.38	98.29	gi|743875039|ref|XP_010907236.1| PREDICTED: U1 small nuclear ribonucleoprotein C-like [Elaeis guineensis]
c38255_g1	108.52	193.52	200.42	13.76	30.02	28.27	8.9	18.51	16.72	gi|672177436|ref|XP_008808813.1| PREDICTED: uncharacterized protein LOC103720742 isoform X1 [Phoenix dactylifera]
c137627_g6	108.49	75.79	83.49	90.83	46.01	55.83	101.59	76.59	87.48	-
c142849_g2	108.36	138.31	130.62	258.69	397.85	435.55	294.47	476.52	506.79	gi|645215194|ref|XP_008221851.1| PREDICTED: ruBisCO large subunit-binding protein subunit beta, chloroplastic [Prunus mume]
c136128_g7	108.28	107.89	107.23	59.61	64.93	65.51	68.61	71.1	73.53	gi|720057661|ref|XP_010274042.1| PREDICTED: RPM1-interacting protein 4-like [Nelumbo nucifera]
c141105_g1	108.25	108.1	103.13	72.53	91.88	86.05	176.04	184.21	191.44	gi|743858518|ref|XP_010942370.1| PREDICTED: obtusifoliol 14-alpha demethylase [Elaeis guineensis] gi|743858522|ref|XP_010942371.1| PREDICTED: obtusifoliol 14-alpha demethylase [Elaeis guineensis] gi|743858526|ref|XP_010942372.1| PREDICTED: obtusifoliol 14-alpha demethylase [Elaeis guineensis] gi|743858530|ref|XP_010942373.1| PREDICTED: obtusifoliol 14-alpha demethylase [Elaeis guineensis] gi|7438…
c141716_g1	108.22	99.39	103	52.04	41.5	44.63	80.42	78.87	76.28	gi|566167613|ref|XP_006384733.1| chaperonin family protein [Populus trichocarpa] gi|550341501|gb|ERP62530.1| chaperonin family protein [Populus trichocarpa]
c137402_g2	108.16	106.67	104.95	82.13	68.13	63.91	88.73	81.21	82.48	gi|672169920|ref|XP_008805009.1| PREDICTED: metal tolerance protein 1-like [Phoenix dactylifera]
c143771_g2	108.06	78.16	83.06	63.11	26.35	28.11	91.01	66.01	56.76	-
c133215_g1	107.99	99.47	105.48	61.95	49.64	47.79	121.78	114.8	113.21	gi|359495700|ref|XP_002275178.2| PREDICTED: vesicle-associated protein 4-2 [Vitis vinifera] gi|297745648|emb|CBI40859.3| unnamed protein product [Vitis vinifera]
c144042_g1	107.9	115.92	119.64	47.14	60.6	58.89	92.81	98.37	94.49	gi|1012330690|gb|KYP42200.1| Putative DNA repair protein RAD23-3 [Cajanus cajan]
c126652_g7	107.88	77.53	73.88	78.81	69.81	60.33	99.03	85.81	113.03	gi|523451495|gb|AGQ43300.1| TUBB3, partial [Oryza nivara] gi|523451497|gb|AGQ43301.1| TUBB3, partial [Oryza rufipogon] gi|523451499|gb|AGQ43302.1| TUBB3, partial [Oryza glumipatula] gi|523451501|gb|AGQ43303.1| TUBB3, partial [Oryza longistaminata] gi|523451503|gb|AGQ43304.1| TUBB3, partial [Oryza barthii] gi|523451505|gb|AGQ43305.1| TUBB3, partial [Oryza meridionalis] gi|523451507|gb|AGQ43306.1| …
c127241_g1	107.87	70.73	72.64	46.93	31.47	29.2	170.72	113.55	122.77	gi|1009121354|ref|XP_015877410.1| PREDICTED: clathrin light chain 2 [Ziziphus jujuba]
c137454_g4	107.79	86.77	88.98	52.62	47.98	51.26	208.41	205.29	198.61	gi|731910980|gb|AIZ68171.1| 60S ribosomal protein L3 [Ornithogalum longebracteatum]
c135594_g1	107.77	102.77	100.13	84.36	76.36	78.96	163.48	150.52	156.48	gi|719984451|ref|XP_010251079.1| PREDICTED: glycine-rich RNA-binding protein 3, mitochondrial [Nelumbo nucifera]
c149459_g5	107.75	95.75	86.67	91.24	86.24	89.74	116.04	100.04	94.12	gi|641819979|gb|KDO40095.1| hypothetical protein CISIN_1g0101662mg, partial [Citrus sinensis]
c135440_g3	107.72	84	83.92	128.77	90.58	93.6	295.07	180.61	193.05	gi|695058542|ref|XP_009417590.1| PREDICTED: RNA-binding protein 24-like [Musa acuminata subsp. malaccensis]
c4167_g1	107.71	33.99	39.31	15.34	7.5	5.39	25.34	7.44	8.86	gi|1035916749|gb|OAY46341.1| hypothetical protein MANES_07G136500 [Manihot esculenta]
c139693_g1	107.65	99.07	102.43	50.81	41.13	43.4	67.49	61.69	63.35	gi|672173074|ref|XP_008806655.1| PREDICTED: ALG-2 interacting protein X-like [Phoenix dactylifera]
c89822_g1	107.59	43.68	42.93	78.85	39.23	39.66	43.17	16.13	19.32	gi|700208128|gb|KGN63247.1| hypothetical protein Csa_2G418340 [Cucumis sativus]
c124083_g1	107.56	40.2	44.29	73.09	28.05	23.98	85.65	30.78	31.83	gi|255543152|ref|XP_002512639.1| PREDICTED: uncharacterized protein LOC8275021 [Ricinus communis] gi|223548600|gb|EEF50091.1| conserved hypothetical protein [Ricinus communis]
c137947_g4	107.54	92.54	92.57	77.72	66.83	72.72	117.01	114.54	109.01	gi|672122644|ref|XP_008784658.1| PREDICTED: probable histone H2A.2 [Phoenix dactylifera]
c148237_g3	107.53	103.96	127.31	39.43	43.92	54.29	84.62	82.05	81.43	gi|548859301|gb|ERN17002.1| hypothetical protein AMTR_s00057p00213330 [Amborella trichopoda]
c137785_g1	107.52	58.93	64.35	0.26	0.07	0.06	0.79	0.39	0.32	gi|1035898459|gb|OAY28060.1| hypothetical protein MANES_15G037900 [Manihot esculenta]
c108851_g1	107.51	46.47	45.31	66.43	31.88	31.43	48.87	16.92	46.96	gi|695034158|ref|XP_009404578.1| PREDICTED: pollen-specific leucine-rich repeat extensin-like protein 1 [Musa acuminata subsp. malaccensis]
c143056_g3	107.31	34.89	44.06	64.35	23.02	33.81	121.63	51.52	50.43	gi|460399928|ref|XP_004245488.1| PREDICTED: signal recognition particle 19 kDa protein [Solanum lycopersicum] gi|970044560|ref|XP_015083702.1| PREDICTED: signal recognition particle 19 kDa protein [Solanum pennellii]
c145876_g4	107.31	40.88	44.55	65.17	31.06	34.09	76.44	32.76	31.04	gi|947054872|gb|KRH04325.1| hypothetical protein GLYMA_17G154400 [Glycine max]
c142110_g1	107.26	98.52	100.94	46.27	54.75	51.65	115.17	114.66	124	gi|743883189|ref|XP_010909345.1| PREDICTED: protein HGV2 isoform X1 [Elaeis guineensis]
c141707_g2	107.25	98.73	89.27	79.17	66.86	63.82	98.4	72.93	89.83	-
c142784_g3	107.19	92.19	102.98	87.52	86.85	82.52	125.92	106.18	117.92	gi|449458876|ref|XP_004147172.1| PREDICTED: NADH dehydrogenase [ubiquinone] 1 alpha subcomplex subunit 13-B [Cucumis sativus] gi|700206428|gb|KGN61547.1| hypothetical protein Csa_2G169710 [Cucumis sativus]
c145096_g5	107.19	22.31	22.95	5.57	1.35	1.85	10.43	2.69	3.88	gi|695066865|ref|XP_009380332.1| PREDICTED: uncharacterized protein LOC103968751 [Musa acuminata subsp. malaccensis]
c146095_g3	107.18	95.18	89.77	104.5	107.47	96.5	80.73	71.73	85.52	-
c142889_g5	107.16	123.21	119.81	48.54	81.08	80.57	183.78	151.11	156.9	gi|951002238|ref|XP_014507284.1| PREDICTED: caffeoylshikimate esterase [Vigna radiata var. radiata]
c147300_g3	107.08	110.77	101.86	93.42	79.92	86.01	97.16	95.11	93.02	gi|743760172|ref|XP_010935739.1| PREDICTED: stem-specific protein TSJT1-like [Elaeis guineensis]
c131737_g2	107.05	95.05	95.55	33.55	28.55	29.9	151.62	135.62	126.7	gi|645218806|ref|XP_008232529.1| PREDICTED: uncharacterized protein LOC103331662 [Prunus mume]
c64600_g1	106.98	20.17	44.04	93.85	0	15.92	118.14	65.84	79.94	-
c143446_g1	106.91	144.86	144.84	10.3	17.29	22.49	71.04	127.95	130.75	gi|641847668|gb|KDO66547.1| hypothetical protein CISIN_1g007703mg [Citrus sinensis]
c141694_g1	106.89	64.91	69.44	106.76	72.57	72.82	163.04	103.48	100.85	gi|743881777|ref|XP_010908989.1| PREDICTED: LOW QUALITY PROTEIN: arginine decarboxylase-like [Elaeis guineensis]
c138490_g1	106.87	69.9	71.4	19.71	24.78	26.33	37.66	41.26	44.04	gi|743843329|ref|XP_010938035.1| PREDICTED: receptor-like protein kinase FERONIA [Elaeis guineensis]
c142494_g1	106.83	101.83	104.95	59.72	51.72	50.71	98.26	94.05	91.26	gi|695029881|ref|XP_009402379.1| PREDICTED: zinc finger CCCH domain-containing protein 33-like [Musa acuminata subsp. malaccensis]
c136356_g1	106.8	70.15	66.27	51.72	35.8	37.36	98.06	57.11	59.12	gi|118154067|gb|ABK63978.1| ZIM motif-containing protein, partial [Triticum aestivum]
c122485_g1	106.7	160.11	129.49	225.36	382.13	361.51	1925.18	2131.83	2364.98	gi|695010879|ref|XP_009392131.1| PREDICTED: 36.4 kDa proline-rich protein-like [Musa acuminata subsp. malaccensis]
c133167_g1	106.58	99.72	101.36	226.75	212.48	219.34	79.82	81.58	75.68	gi|743829625|ref|XP_010934199.1| PREDICTED: uncharacterized protein LOC105054408 [Elaeis guineensis]
c138885_g6	106.55	52.5	55.24	106.89	38.99	43.06	249.42	102.96	104.46	gi|353441070|gb|AEQ94119.1| putative reversibly glycosylatable polypeptide [Elaeis guineensis]
c145763_g1	106.5	44.87	42.1	886.27	430.29	411.82	948.35	459.04	436.29	gi|743849607|ref|XP_010939670.1| PREDICTED: protein EXORDIUM-like 1 [Elaeis guineensis]
c102308_g2	106.34	103.97	101.12	40.82	33.29	33.41	20.14	16.01	16	gi|695047368|ref|XP_009411561.1| PREDICTED: putative glycerol-3-phosphate transporter 1 [Musa acuminata subsp. malaccensis]
c146942_g6	106.34	73.44	86.35	57.53	54.02	49.17	141.99	134.8	128.57	gi|700894141|gb|AIU99499.1| Hydroxyacyl-ACP Dehydrase [Salvia miltiorrhiza]
c132320_g2	106.31	50.36	53.94	8.78	3.61	2.59	14.73	9.4	9.88	gi|672117105|ref|XP_008781732.1| PREDICTED: basic leucine zipper 9 isoform X1 [Phoenix dactylifera]
c149569_g9	106.17	104.38	100.95	65.37	56.75	57.96	66.07	76.9	61.93	gi|657968841|ref|XP_008376131.1| PREDICTED: dynamin-related protein 1B-like [Malus domestica]
c139902_g4	106.15	56.79	54.04	54.17	28.66	33.39	80.74	44.38	47.13	gi|449434891|ref|XP_004135229.1| PREDICTED: protein LSM12 homolog A [Cucumis sativus] gi|700196653|gb|KGN51830.1| hypothetical protein Csa_5G603270 [Cucumis sativus]
c145713_g2	106.12	88.3	100.9	70.69	66.67	63.28	91.42	80.33	87.28	gi|672132697|ref|XP_008789935.1| PREDICTED: small nuclear ribonucleoprotein-associated protein B&apos;-like [Phoenix dactylifera]
c97409_g1	106.11	94.11	93.17	4.42	2.76	3.17	33.92	24.92	25.26	gi|743778568|ref|XP_010919749.1| PREDICTED: blue copper protein-like [Elaeis guineensis]
c149369_g2	106.08	361.94	341.32	52.56	189.07	246.69	81.23	233.64	266.04	gi|672176990|ref|XP_008808576.1| PREDICTED: uncharacterized protein LOC103720587 [Phoenix dactylifera]
c145034_g2	106.02	91.31	102.96	56.51	55.35	51.73	110.32	91.48	91.44	gi|672169083|ref|XP_008804564.1| PREDICTED: probable serine/threonine-protein phosphatase 2A regulatory subunit B&apos;&apos; subunit TON2 [Phoenix dactylifera]
c244173_g1	105.98	56.07	67.04	53.19	64.43	47.77	50.35	28.94	34.04	-
c134658_g1	105.97	68.68	60.42	55.28	33.19	38.3	126.44	80.13	82.76	gi|672119499|ref|XP_008782988.1| PREDICTED: nuclear transcription factor Y subunit C-2-like [Phoenix dactylifera]
c139518_g6	105.97	49.68	53.18	10.74	5.55	4.41	11.4	5.05	7.97	-
c129169_g1	105.92	93.92	104.97	80.49	68.76	72.49	127.48	118.48	114.64	gi|573944129|ref|XP_006654419.1| PREDICTED: cytochrome c [Oryza brachyantha] gi|1002272655|ref|XP_015640631.1| PREDICTED: cytochrome c [Oryza sativa Japonica Group] gi|122169096|sp|Q0DI31.1|CYC_ORYSJ RecName: Full=Cytochrome c gi|152013457|sp|A2Y4S9.1|CYC_ORYSI RecName: Full=Cytochrome c gi|169786|gb|AAA63515.1| cytochrome c [Oryza sativa Indica Group] gi|218249|dbj|BAA02159.1| cytochrome C [Oryz…
c138919_g2	105.92	122.59	121.09	73.2	98.49	99.77	98.76	120.03	125.47	gi|672112573|ref|XP_008806652.1| PREDICTED: ras-related protein RIC1-like isoform X1 [Phoenix dactylifera]
c136622_g1	105.91	23.54	34.21	177.03	62.41	90.68	142.05	37.72	30.77	gi|1000966044|ref|XP_015574780.1| PREDICTED: putative disease resistance RPP13-like protein 1 [Ricinus communis]
c111902_g2	105.89	137.4	162.47	90.73	143.8	157.19	75.15	157.74	149.97	gi|672140578|ref|XP_008794098.1| PREDICTED: profilin-like [Phoenix dactylifera]
c148632_g3	105.83	103.6	102.62	104.18	90.18	87.43	112.69	99.48	106.44	gi|743855588|ref|XP_010941500.1| PREDICTED: DEAD-box ATP-dependent RNA helicase 46-like [Elaeis guineensis]
c139094_g1	105.83	329	344.72	131.84	520.9	531.14	71.98	274.5	267.02	gi|116519134|gb|ABJ99593.1| ferritin [Lycoris aurea]
c139948_g5	105.76	100.76	100.23	39.54	31.54	32.86	15.49	6.58	8.49	gi|672162470|ref|XP_008801051.1| PREDICTED: LOW QUALITY PROTEIN: protein FAF-like, chloroplastic [Phoenix dactylifera]
c124843_g1	105.75	93.75	101.69	81.72	83.65	73.72	127.51	118.51	115.24	gi|672116012|ref|XP_008781156.1| PREDICTED: probable NADH dehydrogenase [ubiquinone] 1 alpha subcomplex subunit 5, mitochondrial [Phoenix dactylifera]
c87365_g1	105.64	30.1	21.37	59.53	0	34.3	51.09	12.16	24	gi|514759593|ref|XP_004964329.1| PREDICTED: 6-phosphogluconate dehydrogenase, decarboxylating 1-like [Setaria italica] gi|514759597|ref|XP_004964330.1| PREDICTED: 6-phosphogluconate dehydrogenase, decarboxylating 1-like [Setaria italica] gi|835966625|ref|XP_012701064.1| PREDICTED: 6-phosphogluconate dehydrogenase, decarboxylating 1-like [Setaria italica] gi|944244698|gb|KQL08992.1| hypothetical p…
c149698_g2	105.62	269.92	281.03	46.86	153.46	149.74	50.34	157.17	151.31	gi|743888412|ref|XP_010910610.1| PREDICTED: pleiotropic drug resistance protein 3-like [Elaeis guineensis]
c145540_g3	105.57	171.49	171.08	43.48	96.23	95.94	81.87	129.85	129.38	gi|743854830|ref|XP_010941090.1| PREDICTED: dihydrolipoyllysine-residue acetyltransferase component 2 of pyruvate dehydrogenase complex, mitochondrial-like [Elaeis guineensis] gi|743854832|ref|XP_010941091.1| PREDICTED: dihydrolipoyllysine-residue acetyltransferase component 2 of pyruvate dehydrogenase complex, mitochondrial-like [Elaeis guineensis]
c146754_g2	105.54	61.3	62.53	6.85	14.1	14.33	29.84	36.23	32.68	gi|743812817|ref|XP_010929537.1| PREDICTED: probable protein phosphatase 2C 39 [Elaeis guineensis] gi|743812821|ref|XP_010929538.1| PREDICTED: probable protein phosphatase 2C 39 [Elaeis guineensis] gi|743812825|ref|XP_010929540.1| PREDICTED: probable protein phosphatase 2C 39 [Elaeis guineensis] gi|743812829|ref|XP_010929541.1| PREDICTED: probable protein phosphatase 2C 39 [Elaeis guineensis] gi|…
c147441_g1	105.48	57.62	49.11	72.08	46.58	46.11	171.07	66.81	86.21	gi|1035940618|gb|OAY66994.1| Translocon-associated protein subunit beta [Ananas comosus]
c147592_g4	105.48	80.1	86.09	53.97	52.23	58.8	88.82	71.51	79.51	gi|743773273|ref|XP_010916974.1| PREDICTED: putative MYST-like histone acetyltransferase 1 isoform X1 [Elaeis guineensis]
c149684_g4	105.34	82.22	91.02	66.72	78.51	77.69	85.88	74.04	64.08	gi|672131962|ref|XP_008789550.1| PREDICTED: cell division cycle protein 48 homolog [Phoenix dactylifera]
c147589_g2	105.33	45.64	43.84	56.6	25.22	24.08	201.82	75.37	73.74	gi|166863145|gb|ABZ01439.1| proliferating cell nuclear antigen, partial [Pinus taeda] gi|166863147|gb|ABZ01440.1| proliferating cell nuclear antigen, partial [Pinus taeda] gi|166863149|gb|ABZ01441.1| proliferating cell nuclear antigen, partial [Pinus taeda] gi|166863151|gb|ABZ01442.1| proliferating cell nuclear antigen, partial [Pinus taeda] gi|166863153|gb|ABZ01443.1| proliferating cell nuclear …
c137789_g1	105.32	115.69	106.23	64.01	66.74	78.53	105.66	112.24	100.84	gi|747066009|ref|XP_011079670.1| PREDICTED: serine/arginine-rich-splicing factor SR34-like [Sesamum indicum]
c150706_g1	105.3	124.94	129.5	56.55	82.9	80.62	77.52	100.49	97.02	gi|695029788|ref|XP_009402330.1| PREDICTED: 2-oxoglutarate dehydrogenase, mitochondrial-like [Musa acuminata subsp. malaccensis]
c100820_g1	105.27	86.91	91.8	17.92	23.08	18.64	29.55	22.93	22.03	gi|672180708|ref|XP_008810553.1| PREDICTED: probable 3-hydroxyacyl-CoA dehydrogenase F54C8.1 [Phoenix dactylifera]
c140730_g3	105.22	118.66	125.15	53.86	80.17	69.97	180.21	240.31	232.86	gi|149391345|gb|ABR25690.1| 60S ribosomal protein l7a, partial [Oryza sativa Indica Group]
c126239_g1	105.18	68.28	68.29	111.95	75.78	81.89	80.29	59.02	59.15	gi|695012994|ref|XP_009393271.1| PREDICTED: peroxisomal 2,4-dienoyl-CoA reductase-like [Musa acuminata subsp. malaccensis]
c134578_g1	105.04	93.11	99.82	0	0	0	0	0	0	gi|743872656|ref|XP_010906608.1| PREDICTED: 14 kDa proline-rich protein DC2.15-like [Elaeis guineensis]
c150703_g1	105.02	40.22	36.34	83.51	32.06	25.1	191.12	83.93	76.81	gi|661902272|dbj|BAP11118.1| putative ribonucleoside-diphosphate reductase small chain C, partial [Zanthoxylum ailanthoides] gi|661902274|dbj|BAP11119.1| putative ribonucleoside-diphosphate reductase small chain C, partial [Zanthoxylum ailanthoides] gi|661902276|dbj|BAP11120.1| putative ribonucleoside-diphosphate reductase small chain C, partial [Zanthoxylum ailanthoides] gi|661902278|dbj|BAP1112…
c141931_g3	105	66.56	70.97	30.62	25.14	24.51	54.07	39.44	39.76	gi|743775457|ref|XP_010918107.1| PREDICTED: WEB family protein At5g55860-like [Elaeis guineensis]
c21327_g1	104.98	52.3	70.98	18.61	9.61	0	87.7	118.14	101.7	gi|657989479|ref|XP_008386942.1| PREDICTED: fructose-bisphosphate aldolase cytoplasmic isozyme-like [Malus domestica]
c280581_g1	104.98	75.35	73.79	19.42	16.38	14.57	69.38	48.06	47.53	gi|743811658|ref|XP_010929218.1| PREDICTED: protein CYPRO4-like [Elaeis guineensis]
c150759_g3	104.89	777.21	767.27	2.86	31.2	29.97	9.59	68.6	62.85	-
c150402_g2	104.75	74.12	64.9	42.3	25.43	25.08	143.81	80.22	85.92	gi|743833972|ref|XP_010935395.1| PREDICTED: protein TRANSPARENT TESTA 12-like [Elaeis guineensis]
c149160_g2	104.64	110.43	106.61	48.94	59.24	69.37	73.43	72.65	71.06	gi|720033039|ref|XP_010266303.1| PREDICTED: mitotic spindle checkpoint protein BUBR1 [Nelumbo nucifera]
c143840_g2	104.63	32.59	35.98	70.74	20.94	17.06	158.81	58.52	29.14	gi|695018595|ref|XP_009396267.1| PREDICTED: chromosome-associated kinesin KIF4-like [Musa acuminata subsp. malaccensis]
c137857_g1	104.61	97.55	98.96	12.72	12.49	13.86	11.03	8.83	8.57	gi|672165870|ref|XP_008802853.1| PREDICTED: protein YLS2-like [Phoenix dactylifera]
c135982_g1	104.57	96.05	99.22	36.25	23.94	20.49	57.23	46.62	48.66	gi|743864075|ref|XP_010943941.1| PREDICTED: expansin-like A2 [Elaeis guineensis]
c137342_g3	104.55	103.77	99.33	259.79	268.26	252.38	326.89	304.34	322.75	gi|695020003|ref|XP_009397036.1| PREDICTED: protein NRT1/ PTR FAMILY 2.13-like isoform X1 [Musa acuminata subsp. malaccensis]
c146469_g1	104.5	168.42	162.12	55.4	106.12	104.97	45.07	72.95	70.62	gi|672128189|ref|XP_008787574.1| PREDICTED: probable polyamine oxidase 2 [Phoenix dactylifera]
c139896_g3	104.49	77.38	85.11	30.45	28.57	27.24	61.25	52.83	52.42	-
c143679_g1	104.26	40.87	42.36	75.64	29.39	33.18	81.7	36.61	37.18	gi|743838137|ref|XP_010936614.1| PREDICTED: U-box domain-containing protein 4 [Elaeis guineensis]
c138188_g3	104.23	95.71	115.96	89.95	77.64	64.36	85	83.39	76.43	-
c131676_g4	104.2	62.6	65.17	49.96	39.99	37.76	88.69	63.8	59.01	gi|672141479|ref|XP_008794569.1| PREDICTED: UPF0235 protein At5g63440 [Phoenix dactylifera] gi|672141481|ref|XP_008794570.1| PREDICTED: UPF0235 protein At5g63440 [Phoenix dactylifera]
c138394_g1	104.16	81.53	88.98	87.51	88.92	80.05	98.67	90.4	86.74	gi|544590483|gb|AGW24659.1| syntaxin 71 [Ornithogalum longebracteatum]
c127201_g1	104.11	96.11	102.06	106.74	91.74	98.07	118.51	130.51	128.23	-
c86125_g1	104.1	99.36	121.35	36.04	29.39	47.46	210.34	189.09	242.14	-
c135369_g1	104	55.15	57.76	42.22	25.69	25.57	81.86	52.94	54.5	gi|694996262|ref|XP_009393079.1| PREDICTED: ER membrane protein complex subunit 8/9 homolog [Musa acuminata subsp. malaccensis]
c147353_g6	103.98	85.22	90.66	60.88	67.17	73.89	86.74	83.47	83.25	gi|743769762|ref|XP_010915172.1| PREDICTED: serine/threonine-protein phosphatase PP2A-1 catalytic subunit-like [Elaeis guineensis]
c135386_g2	103.95	88.21	69.95	61.62	52.62	51.32	104.63	111.32	118.63	gi|672116246|ref|XP_008781278.1| PREDICTED: small nuclear ribonucleoprotein Sm D3 [Phoenix dactylifera]
c147807_g2	103.89	346.79	334.37	21.95	97.88	87.58	63.5	161.16	180.13	gi|672157762|ref|XP_008798601.1| PREDICTED: ATP-dependent 6-phosphofructokinase 3-like [Phoenix dactylifera]
c124166_g1	103.89	73.63	75.17	65.3	59.06	62.46	52.58	49.52	47.5	gi|672118065|ref|XP_008782232.1| PREDICTED: selenoprotein K-like [Phoenix dactylifera]
c132710_g1	103.88	88.88	81.88	25.26	17.42	20.26	41.24	36.32	33.24	-
c130364_g2	103.72	52.06	54.29	7.27	5.71	3.34	166.6	78.46	89.12	gi|672158986|ref|XP_008799243.1| PREDICTED: LOB domain-containing protein 41-like [Phoenix dactylifera]
c142830_g2	103.71	68.29	74.54	48.27	43.67	46.68	97.25	66.01	70.16	gi|743803605|ref|XP_010926963.1| PREDICTED: mitochondrial fission 1 protein A-like [Elaeis guineensis]
c131001_g4	103.6	39.78	43.77	55.37	24.19	23.53	121.04	46.34	47.37	-
c136106_g4	103.6	105.4	110.35	50.86	68.16	67.11	157.07	195.8	198.34	gi|743854742|ref|XP_010941042.1| PREDICTED: 40S ribosomal protein S13 [Elaeis guineensis]
c142899_g1	103.51	91.51	96.84	89.8	86.84	81.8	393.48	384.48	412.65	-
c129957_g1	103.47	61.28	58.12	38.51	30.98	27.37	96.6	70.59	70.02	gi|743831389|ref|XP_010934682.1| PREDICTED: proteasome subunit beta type-1-like [Elaeis guineensis]
c147613_g4	103.44	95.44	80.38	114.92	99.92	132.15	231.17	243.17	256.09	gi|976908148|gb|KVH95378.1| hypothetical protein Ccrd_002518 [Cynara cardunculus var. scolymus]
c135889_g2	103.41	108.59	98.34	58.62	69.44	72.64	103.98	73.84	85.06	gi|672141742|ref|XP_008794708.1| PREDICTED: myb family transcription factor APL-like isoform X2 [Phoenix dactylifera]
c127676_g1	103.4	70.21	73.59	33.59	25.55	24.89	122.1	94.68	96.28	gi|672141631|ref|XP_008794650.1| PREDICTED: glycine-rich RNA-binding protein 4, mitochondrial-like [Phoenix dactylifera]
c142063_g4	103.33	351.29	361.68	35.68	165.01	170.99	85.43	335.45	319.14	gi|743869025|ref|XP_010905720.1| PREDICTED: ras-related protein RABE1c [Elaeis guineensis]
c145454_g2	103.32	38.7	35.89	62.75	29.08	30.3	124.83	44.96	36	gi|743851659|ref|XP_010940193.1| PREDICTED: transcription initiation factor TFIID subunit 9-like [Elaeis guineensis]
c145316_g1	103.31	124.31	124.36	35.39	60.37	58.48	62.29	83.69	83.04	gi|743800604|ref|XP_010926023.1| PREDICTED: mannose-6-phosphate isomerase 2-like [Elaeis guineensis]
c149894_g1	103.31	58.24	64.45	77.82	48.57	49.12	132	64.76	65.95	gi|102139739|gb|ABF69946.1| FtsJ-like methyltransferase family protein [Musa acuminata]
c149824_g1	103.18	47.47	52.12	48.49	26.45	24.97	94.53	43.9	47.14	gi|743771003|ref|XP_010915789.1| PREDICTED: 3-methyl-2-oxobutanoate hydroxymethyltransferase 1, mitochondrial-like [Elaeis guineensis]
c136504_g1	103.17	87.79	97.95	68.28	58.88	60.87	59.86	62.99	55.72	gi|84663861|gb|ABC60343.1| putative glycine-rich protein [Musa acuminata AAA Group]
c122616_g2	103.11	55.93	60.52	55.2	35.74	36.32	52.56	38.46	34.74	gi|695000065|ref|XP_009410045.1| PREDICTED: uncharacterized protein LOC103992162 [Musa acuminata subsp. malaccensis]
c145897_g2	103.1	68.04	71.76	74.12	59.52	53.53	100.13	93.56	67.06	gi|743756115|ref|XP_010915190.1| PREDICTED: hexokinase-2-like [Elaeis guineensis]
c140117_g2	103.04	79.88	77.28	51.95	51.24	52.71	126.71	117.44	118.56	gi|695008482|ref|XP_009390836.1| PREDICTED: uncharacterized protein LOC103977131 [Musa acuminata subsp. malaccensis]
c125843_g2	102.98	35.38	34.69	102.3	34.85	38.08	119.04	35.55	45.71	-
c144167_g3	102.9	90.9	89.25	137.26	132.27	129.26	63.21	54.21	59.54	gi|743781939|ref|XP_010921017.1| PREDICTED: mitoferrin [Elaeis guineensis]
c136601_g1	102.9	52.52	54.24	60.93	35.14	37.48	129.78	72.48	71.4	gi|743788626|ref|XP_010922712.1| PREDICTED: U-box domain-containing protein 16-like [Elaeis guineensis]
c36572_g1	102.82	43.13	47.25	55.22	17.18	21.32	160.64	40.36	55.47	gi|920698821|gb|KOM42046.1| hypothetical protein LR48_Vigan04g224400, partial [Vigna angularis]
c98591_g1	102.8	94.8	102.46	120.97	105.97	132.71	20.7	32.7	95.08	gi|731335540|ref|XP_010678777.1| PREDICTED: iron-sulfur cluster assembly protein 1-like [Beta vulgaris subsp. vulgaris]
c140448_g2	102.77	90.77	84.07	53.6	48.6	49.75	189.1	173.1	189.95	gi|672195561|ref|XP_008776574.1| PREDICTED: 40S ribosomal protein S25-like [Phoenix dactylifera]
c136430_g1	102.76	115.41	126.17	41.42	38.69	41.79	100.2	112.93	110.96	gi|743840502|ref|XP_010937279.1| PREDICTED: eukaryotic translation initiation factor 3 subunit K [Elaeis guineensis]
c134079_g3	102.73	33.35	43.04	67.18	36.45	34.45	74.62	39.86	45.63	gi|695012863|ref|XP_009393203.1| PREDICTED: uncharacterized protein LOC103978955 [Musa acuminata subsp. malaccensis]
c146636_g3	102.69	19.27	17.59	54.93	8.56	11.38	95.07	23.43	20.35	-
c122753_g2	102.55	90.55	102.35	51.38	46.38	61.3	115.06	99.06	91.73	-
c142066_g1	102.51	70.18	74.84	144.94	102.98	100.07	102.67	70.57	68.78	gi|743790002|ref|XP_010923059.1| PREDICTED: non-specific phospholipase C1 [Elaeis guineensis]
c134857_g1	102.4	104.27	108.51	202.13	200.27	205.97	146.14	147.13	146.73	gi|188572010|gb|ACD64979.1| unknown protein [Ophiopogon japonicus]
c133651_g4	102.39	68.23	67.4	72.03	73.06	67.26	135.75	89.13	88.25	gi|695017699|ref|XP_009395794.1| PREDICTED: KRR1 small subunit processome component [Musa acuminata subsp. malaccensis]
c129804_g2	102.38	51.77	49.56	76.85	32.93	37.61	55.54	67.23	68.18	-
c104841_g1	102.37	62.66	68.37	31.14	22.14	13.31	80.08	94.75	94.08	gi|30017489|gb|AAP12911.1| putative reversibly glycosylated polypeptide, 3&apos;-partial, partial [Oryza sativa Japonica Group]
c138496_g1	102.33	100.59	90.6	75.44	59.4	44.45	120.61	38.37	41.59	gi|284434590|gb|ADB85325.1| putative heat shock cognate, partial [Phyllostachys edulis]
c144390_g1	102.3	100.63	96.41	49.25	60.6	52.59	74.53	69.36	74.15	gi|743832993|ref|XP_010935133.1| PREDICTED: uncharacterized protein LOC105055113 isoform X1 [Elaeis guineensis]
c171867_g1	102.25	90.25	67.67	14.38	19.28	6.38	71.28	62.28	85.44	gi|672190537|ref|XP_008775276.1| PREDICTED: poly(rC)-binding protein 1 [Phoenix dactylifera] gi|672190541|ref|XP_008775277.1| PREDICTED: poly(rC)-binding protein 1 [Phoenix dactylifera] gi|672190545|ref|XP_008775278.1| PREDICTED: poly(rC)-binding protein 1 [Phoenix dactylifera]
c147611_g1	102.24	95.8	95.96	34.76	33.55	34.36	28.37	21.67	23.83	gi|743872953|ref|XP_010906691.1| PREDICTED: uncharacterized protein LOC105033529 [Elaeis guineensis]
c150259_g2	102.2	179.96	189.32	37.95	93.3	90.02	77.53	140.21	136.72	gi|743798037|ref|XP_010925132.1| PREDICTED: structural maintenance of chromosomes protein 3 [Elaeis guineensis] gi|743798039|ref|XP_010925134.1| PREDICTED: structural maintenance of chromosomes protein 3 [Elaeis guineensis]
c148691_g2	102.19	65.74	67.45	34.85	21.67	26.14	427.36	239.48	249.26	gi|743818449|ref|XP_010931228.1| PREDICTED: tropinone reductase homolog At1g07440-like [Elaeis guineensis]
c146177_g1	102.17	37.83	36.94	2.44	1.6	1.17	2.21	1.14	1.71	-
c146155_g1	102.13	168.27	165.05	41.68	69.83	71.94	80.65	144.41	142.69	gi|1035959284|gb|OAY80387.1| DNA-directed RNA polymerases II and IV subunit 5A [Ananas comosus]
c135392_g1	102.12	90.12	91.39	434.94	429.94	424.51	130.02	114.02	115.09	gi|695001628|ref|XP_009417196.1| PREDICTED: probable pyridoxal biosynthesis protein PDX1.1 [Musa acuminata subsp. malaccensis]
c147317_g2	102.12	93.6	76.98	68.56	56.25	32.07	90.87	73.74	82.3	-
c125618_g1	102.12	119.22	109.5	54.68	74.37	83.15	145.94	170.29	186.99	gi|743778306|ref|XP_010919610.1| PREDICTED: coatomer subunit alpha-1 [Elaeis guineensis] gi|743778308|ref|XP_010919611.1| PREDICTED: coatomer subunit alpha-1 [Elaeis guineensis] gi|743778310|ref|XP_010919612.1| PREDICTED: coatomer subunit alpha-1 [Elaeis guineensis]
c141463_g2	102.11	41.94	48.49	19.23	13.51	11.42	690.97	373.51	394.96	-
c142710_g2	102.11	129.17	141.53	13.56	21.32	19.54	45.45	66.41	65.2	gi|1026035490|ref|XP_016563900.1| PREDICTED: alpha-galactosidase-like isoform X2 [Capsicum annuum]
c140232_g1	102.09	62.75	60.86	47.89	32.07	35.42	67.04	42.41	45.86	gi|751869150|dbj|BAQ21911.1| gamma-glutamyl transpeptidase [Allium sativum]
c139380_g1	102.09	115.84	117.39	52.8	66.33	60.73	73.59	77.98	82.72	gi|695074052|ref|XP_009384212.1| PREDICTED: probable proteasome inhibitor [Musa acuminata subsp. malaccensis]
c143176_g3	102.08	67.44	70.32	56.38	36.58	39.55	170.38	113.1	111.99	gi|743763668|ref|XP_010912028.1| PREDICTED: 40S ribosomal protein S10-like [Elaeis guineensis]
c142486_g1	102.07	110.54	113	43.85	58.33	59.8	67.73	73.63	70.27	gi|502104038|ref|XP_004492419.1| PREDICTED: auxin transporter-like protein 2 [Cicer arietinum]
c141327_g2	102.06	87.06	89.8	94.69	80.09	89.69	371.68	393.86	363.68	gi|985563848|dbj|BAU46558.1| fructan:fructan 6G-fructosyltransferase [Allium cepa]
c89822_g2	102.04	94.04	105.3	52.72	37.72	35.46	9.32	21.32	21.68	gi|743793140|ref|XP_010923853.1| PREDICTED: uncharacterized protein LOC105046822 [Elaeis guineensis]
c136409_g4	102.04	34.8	33.99	10.96	2.73	3.45	4.44	1.43	0.92	gi|720003582|ref|XP_010257037.1| PREDICTED: abscisic acid receptor PYL4 [Nelumbo nucifera]
c143221_g4	102.03	84.46	88.54	36.27	42.41	35.13	121.81	120.39	122.53	gi|743797271|ref|XP_010924940.1| PREDICTED: 60S ribosomal protein L28-2-like [Elaeis guineensis]
c283237_g1	102.02	67.98	132.49	47.74	86.48	85.48	14.95	61.43	39.95	gi|17221331|emb|CAC83004.1| cytosolic malate dehydrogenase [Sesbania rostrata]
c148376_g4	102.02	142.9	139.53	12.53	21.67	20.98	29.76	47.12	46.34	gi|743876728|ref|XP_010907652.1| PREDICTED: copper amine oxidase 1 [Elaeis guineensis]
c143258_g1	101.94	98.91	99.61	50.74	59.19	56.4	103.06	107.26	109.65	gi|731911329|gb|AIZ68194.1| eukaryotic translation initiation factor 2 subunit gamma-like isoform X1 [Ornithogalum longebracteatum]
c147566_g1	101.91	93.39	98.38	8.54	6.23	8.01	39.08	30.87	30.51	gi|672135207|ref|XP_008791269.1| PREDICTED: proline-rich receptor-like protein kinase PERK13 [Phoenix dactylifera]
c130392_g2	101.89	33.92	38.06	72.17	27.42	29.7	104.91	36.05	31.46	gi|1035955600|gb|OAY77374.1| Importin subunit alpha-1a [Ananas comosus]
c140420_g3	101.88	350.97	382.67	50.32	155.59	162.13	90.06	351.39	338.44	gi|743797195|ref|XP_010924921.1| PREDICTED: DEAD-box ATP-dependent RNA helicase 56 [Elaeis guineensis] gi|743797199|ref|XP_010924922.1| PREDICTED: DEAD-box ATP-dependent RNA helicase 56 [Elaeis guineensis]
c148977_g4	101.85	265.56	270.37	36.36	114.97	112.19	24.61	81.05	78.79	gi|743795961|ref|XP_010924612.1| PREDICTED: phosphoenolpyruvate carboxylase 2 [Elaeis guineensis]
c137895_g1	101.81	93.29	90.83	114.15	101.84	104.82	145.43	136.16	136.86	gi|743772134|ref|XP_010916367.1| PREDICTED: uncharacterized protein LOC105041202 [Elaeis guineensis]
c166771_g1	101.72	49.65	30.94	65.75	49.84	4.14	112.77	50.41	45.39	gi|695068547|ref|XP_009381221.1| PREDICTED: far upstream element-binding protein 2-like [Musa acuminata subsp. malaccensis] gi|695068549|ref|XP_009381222.1| PREDICTED: far upstream element-binding protein 2-like [Musa acuminata subsp. malaccensis]
c134991_g1	101.69	44.33	57.93	103.26	57.53	53.7	139.67	72.25	72	gi|743757725|ref|XP_010923349.1| PREDICTED: centrosomal protein of 55 kDa-like [Elaeis guineensis]
c148192_g1	101.61	195.06	194.06	55.7	136.69	131	31.55	69.05	68.36	gi|672135561|ref|XP_008791449.1| PREDICTED: probable indole-3-acetic acid-amido synthetase GH3.5 [Phoenix dactylifera] gi|672135563|ref|XP_008791450.1| PREDICTED: probable indole-3-acetic acid-amido synthetase GH3.5 [Phoenix dactylifera] gi|672135565|ref|XP_008791451.1| PREDICTED: probable indole-3-acetic acid-amido synthetase GH3.5 [Phoenix dactylifera]
c129876_g4	101.6	98.7	96.38	47.58	38.34	40.17	64.94	65.74	60.8	gi|743799853|ref|XP_010925627.1| PREDICTED: tubby-like F-box protein 1 [Elaeis guineensis]
c136498_g1	101.53	43.91	50.64	94.68	47.97	53.28	60.75	44.41	43.59	gi|672199383|ref|XP_008777598.1| PREDICTED: uncharacterized protein LOC103697505 isoform X3 [Phoenix dactylifera]
c138579_g7	101.46	80.63	82.94	139.44	158.74	159.9	84.26	73.67	82.39	gi|720027858|ref|XP_010264707.1| PREDICTED: pyridoxal biosynthesis protein PDX2-like [Nelumbo nucifera]
c141708_g1	101.45	764.53	788.88	28.6	272.05	263.55	32.46	322.24	313.25	gi|743759075|ref|XP_010930192.1| PREDICTED: B2 protein-like [Elaeis guineensis]
c141902_g5	101.43	249.75	247.27	16.99	51.67	38.97	60.35	167.68	195	gi|1035955708|gb|OAY77459.1| Reticulon-like protein B1 [Ananas comosus]
c149864_g5	101.35	63.7	73.18	60.78	43.92	45.8	94.19	53.94	53.21	gi|763759614|gb|KJB26945.1| hypothetical protein B456_004G267500 [Gossypium raimondii]
c141602_g3	101.33	62.12	59.25	63.22	46.54	52.25	79.88	59	63.8	gi|672129237|ref|XP_008788122.1| PREDICTED: probable prefoldin subunit 4 [Phoenix dactylifera]
c145051_g5	101.26	89.26	87.61	52.7	46.55	44.7	80.5	71.5	81.95	gi|743778137|ref|XP_010919522.1| PREDICTED: NADH dehydrogenase [ubiquinone] 1 beta subcomplex subunit 8, mitochondrial-like isoform X1 [Elaeis guineensis]
c140863_g2	101.15	92.63	92.2	86.86	74.55	70.97	101.89	95.9	93.32	-
c91188_g1	101.14	24.34	26.76	0.32	0.14	0.12	212.26	64.49	64.21	gi|672138457|ref|XP_008792988.1| PREDICTED: putative lipid-transfer protein DIR1 [Phoenix dactylifera]
c245394_g1	101.14	65.54	56	51.86	27.75	22.61	60.84	51.83	67.34	-
c81721_g2	101.14	39.63	30.8	17.57	20.81	10.44	38.56	15.41	23.22	gi|672183650|ref|XP_008812109.1| PREDICTED: uncharacterized protein LOC103723081 [Phoenix dactylifera]
c145141_g4	101.1	96.1	98.52	47.43	39.43	31.57	103.01	86.49	96.01	gi|548848048|gb|ERN07151.1| hypothetical protein AMTR_s00019p00136590 [Amborella trichopoda]
c145979_g5	101.04	53.38	56.05	57.04	30.27	28.48	91.37	45.53	50.01	gi|672176961|ref|XP_008808562.1| PREDICTED: uncharacterized protein LOC103720575 [Phoenix dactylifera]
c147540_g3	101.02	126.94	131.07	26.34	45.59	39.9	40.87	57.5	58.31	gi|672178279|ref|XP_008809269.1| PREDICTED: galactokinase isoform X2 [Phoenix dactylifera]
c134504_g3	100.99	93.71	97.78	55.66	41.66	37.4	120.32	102.84	114.07	gi|719965791|ref|XP_010257491.1| PREDICTED: protein DCL, chloroplastic-like [Nelumbo nucifera]
c140424_g1	100.97	310.37	308.38	28.31	97.84	94.6	62.56	219.01	205.4	gi|1035956321|gb|OAY77950.1| Erlin-2 [Ananas comosus]
c147371_g3	100.97	110.89	121.12	72.05	65.73	65.95	102.43	118.26	113.55	gi|672141545|ref|XP_008794604.1| PREDICTED: ankyrin repeat and SAM domain-containing protein 6 isoform X2 [Phoenix dactylifera]
c145353_g2	100.93	88.93	87.35	64.2	49.67	56.2	102.01	93.01	89.56	-
c136522_g1	100.86	95.86	89.35	77.59	69.59	75.2	130.33	115.47	123.33	gi|296084845|emb|CBI27727.3| unnamed protein product [Vitis vinifera]
c144309_g2	100.86	85.86	112.19	51.39	12.76	46.39	91.11	59.29	83.11	gi|527190577|gb|EPS61756.1| hypothetical protein M569_13042, partial [Genlisea aurea]
c141888_g3	100.85	97.38	87.79	27.36	36.91	39.85	56.73	54.09	54.69	gi|672159662|ref|XP_008799597.1| PREDICTED: UDP-glucose 4-epimerase GEPI48 [Phoenix dactylifera]
c138610_g3	100.85	99.75	99.56	62.94	73.92	73.01	64.65	76.21	69.09	gi|743862765|ref|XP_010943627.1| PREDICTED: MOB kinase activator-like 1 [Elaeis guineensis]
c108419_g1	100.83	86.53	78.09	326.7	251.24	274.22	378.92	327.97	323.61	-
c132098_g2	100.77	47.16	49.92	33.44	24.2	23.42	76.38	42.03	47.3	gi|695073696|ref|XP_009384023.1| PREDICTED: ribosomal RNA-processing protein 14-C-like [Musa acuminata subsp. malaccensis]
c134852_g2	100.76	88.76	101.22	53.56	48.56	38.87	135.5	119.5	109.47	-
c147711_g1	100.72	82.95	79.62	521.98	452.48	447.17	462.6	372.83	367.17	gi|743835120|ref|XP_010935727.1| PREDICTED: ruBisCO large subunit-binding protein subunit alpha-like [Elaeis guineensis]
c131000_g1	100.71	79.66	79.26	68.92	56.97	60.59	26.17	25.86	25.06	gi|672169944|ref|XP_008805022.1| PREDICTED: probable ubiquitin-conjugating enzyme E2 C [Phoenix dactylifera]
c148284_g4	100.59	92.96	99.62	57.12	49.44	44.71	83.79	66.23	71.84	gi|743754637|ref|XP_010937402.1| PREDICTED: uncharacterized protein LOC105055445 isoform X2 [Elaeis guineensis] gi|743754639|ref|XP_010938178.1| PREDICTED: uncharacterized protein LOC105055445 isoform X2 [Elaeis guineensis]
c150519_g2	100.57	38.46	41.01	57.54	21.82	22.13	119.33	28.24	24.09	gi|259151159|emb|CBF11244.1| putative glyceraldehyde-3-phosphate dehydrogenase [Rhododendron simsii]
c144726_g1	100.52	81.38	75.52	83.51	51.84	48.51	66.47	41.47	52.11	-
c140602_g2	100.5	95.5	99.2	72.52	64.52	63.69	85.7	70.57	78.7	gi|743771545|ref|XP_010916061.1| PREDICTED: 60S ribosomal protein L18a-like protein [Elaeis guineensis]
c145471_g2	100.39	37.76	43.96	80.46	41.11	35.52	119.01	57.94	56.53	-
c146258_g1	100.34	92.78	95.12	78.46	72.18	71.05	97.97	92.2	93.83	gi|743886888|ref|XP_010910254.1| PREDICTED: signal recognition particle receptor subunit alpha homolog [Elaeis guineensis] gi|743886892|ref|XP_010910255.1| PREDICTED: signal recognition particle receptor subunit alpha homolog [Elaeis guineensis]
c85633_g1	100.34	78.45	72.88	27.98	20.44	25.18	88.48	73.21	72.79	gi|1035943410|gb|OAY68774.1| hypothetical protein ACMD2_09739 [Ananas comosus]
c133040_g1	100.24	61.65	58.53	39.52	22.75	23.82	60.14	42.4	38.91	gi|951068203|ref|XP_014489570.1| PREDICTED: peptidyl-prolyl cis-trans isomerase CYP22 [Vigna radiata var. radiata] gi|965602120|dbj|BAT89297.1| hypothetical protein VIGAN_06021800 [Vigna angularis var. angularis]
c124807_g1	100.23	30.96	26.11	32.27	5.24	6.29	90.58	30.34	30	-
c143173_g5	100.16	88.16	97.83	50.25	40.64	42.25	66.31	57.31	58.82	gi|590624248|ref|XP_007025552.1| Nucleic acid-binding [Theobroma cacao] gi|508780918|gb|EOY28174.1| Nucleic acid-binding [Theobroma cacao]
c148933_g1	100.16	47.04	55.25	64.87	30.38	33.07	46.33	15.75	24.71	gi|225453845|ref|XP_002277837.1| PREDICTED: lysophospholipid acyltransferase LPEAT2 isoform X2 [Vitis vinifera]
c148787_g1	100.09	687.85	737.39	2.19	21.08	17.3	1.3	14.91	14.68	gi|731911665|gb|AIZ68217.1| CBL-interacting protein kinase 23-like protein [Ornithogalum longebracteatum]
c140371_g1	100.07	88.07	91.97	91.42	84.65	83.42	89.07	80.07	83.97	gi|695073250|ref|XP_009383782.1| PREDICTED: vesicle-associated protein 4-2-like [Musa acuminata subsp. malaccensis]
c146272_g2	100.07	52.22	56.24	89.36	50.82	51.41	108.46	48.98	48.11	gi|695078890|ref|XP_009386846.1| PREDICTED: uncharacterized protein LOC103973899 [Musa acuminata subsp. malaccensis]
c125081_g1	100.07	97.4	103.22	71.32	140.93	142.38	35.75	61.78	63.2	gi|12697488|emb|CAC28220.1| p-type H+-ATPase [Sesbania rostrata]
c146412_g1	100.05	88.05	90.68	57.37	43.42	49.37	64.07	55.07	50.83	gi|743800160|ref|XP_010925791.1| PREDICTED: BTB/POZ domain-containing protein POB1 isoform X2 [Elaeis guineensis]
c116514_g1	100.04	37.05	39.95	55.31	12.45	17.53	20.62	10.06	10.04	-
c140529_g4	99.99	84.99	95.12	113.15	109.02	108.15	58.48	51.28	50.48	gi|695067845|ref|XP_009380843.1| PREDICTED: uncharacterized protein LOC103969120 [Musa acuminata subsp. malaccensis]
c148845_g1	99.99	87.99	66.78	57.17	26.02	49.17	46.94	37.94	45.73	gi|1035949476|gb|OAY72973.1| Baculoviral IAP repeat-containing protein 3, partial [Ananas comosus]
c138943_g6	99.94	84.94	92.39	83.02	74.25	78.02	349.12	331.59	341.12	gi|47026963|gb|AAT08700.1| pollen-specific protein [Hyacinthus orientalis]
c150729_g2	99.94	84.94	84.4	108.89	99.62	103.89	527.71	501.74	519.71	gi|567858482|ref|XP_006421924.1| hypothetical protein CICLE_v10004755mg [Citrus clementina] gi|557523797|gb|ESR35164.1| hypothetical protein CICLE_v10004755mg [Citrus clementina]
c127850_g1	99.94	18.93	18.22	112.72	43.9	32.1	4.74	0	3.96	-
c138174_g1	99.93	45.53	47.9	82.4	45.52	43.72	142.44	65.86	69.87	gi|695065836|ref|XP_009379786.1| PREDICTED: putative glycosyltransferase 5 [Musa acuminata subsp. malaccensis] gi|695065838|ref|XP_009379787.1| PREDICTED: putative glycosyltransferase 5 [Musa acuminata subsp. malaccensis]
c141866_g1	99.81	94.81	96.53	13.99	5.99	12.26	34.1	23.15	27.1	gi|672125338|ref|XP_008786085.1| PREDICTED: transcription factor UNE12-like isoform X2 [Phoenix dactylifera]
c136432_g3	99.79	40.81	36.66	72.48	29.94	35.04	41.34	19.92	20.26	gi|672161649|ref|XP_008800648.1| PREDICTED: LOB domain-containing protein 38-like [Phoenix dactylifera]
c142245_g1	99.74	91.74	101	64.18	49.18	39.16	54.31	66.31	73.31	gi|18420256|ref|NP_568396.1| RING-box protein 1 [Arabidopsis thaliana] gi|37537976|sp|Q940X7.1|RBX1A_ARATH RecName: Full=RING-box protein 1a; AltName: Full=At-Rbx1;1; AltName: Full=Protein RING of cullins 1; AltName: Full=RBX1-2; AltName: Full=RBX1a-At gi|16186265|gb|AAL13435.1| ring box-1-like protein [Arabidopsis thaliana] gi|18252991|gb|AAL62422.1| ring-box protein - like [Arabidopsis thaliana…
c143603_g1	99.74	30.95	31.14	8325.43	3622.83	3628.33	3293.4	1416.96	1416.64	gi|976926492|gb|KVI10354.1| hypothetical protein Ccrd_011240 [Cynara cardunculus var. scolymus]
c142986_g3	99.67	407.36	423.12	17.69	98.56	95.36	69	350.4	331.17	gi|672133009|ref|XP_008790105.1| PREDICTED: signal peptide peptidase 2-like [Phoenix dactylifera] gi|672133011|ref|XP_008790106.1| PREDICTED: signal peptide peptidase 2-like [Phoenix dactylifera] gi|672133013|ref|XP_008790107.1| PREDICTED: signal peptide peptidase 2-like [Phoenix dactylifera] gi|672133015|ref|XP_008790108.1| PREDICTED: signal peptide peptidase 2-like [Phoenix dactylifera] gi|6721…
c150635_g1	99.61	151.06	143.18	65.75	126.28	131.1	64.74	93.01	88.02	gi|763741413|gb|KJB08912.1| hypothetical protein B456_001G1123002, partial [Gossypium raimondii]
c147595_g1	99.6	103.96	103.99	48.13	65.27	61.84	63.65	71.5	67.5	gi|672187983|ref|XP_008813469.1| PREDICTED: probable E3 ubiquitin-protein ligase ARI8 [Phoenix dactylifera]
c131482_g2	99.57	93.13	94.35	54.66	41.84	47.25	115.14	108.98	111	gi|672145643|ref|XP_008796746.1| PREDICTED: LOW QUALITY PROTEIN: membrane steroid-binding protein 2 [Phoenix dactylifera]
c140183_g2	99.49	59.53	63.89	39.33	28.78	28.61	73.84	49.42	53.61	-
c137408_g2	99.49	105.28	102.24	1.51	3.4	2.15	39.24	44.52	42.16	gi|695044028|ref|XP_009409740.1| PREDICTED: ribulose bisphosphate carboxylase small chain clone 512-like [Musa acuminata subsp. malaccensis]
c139948_g7	99.48	51.69	53.09	16.56	12.39	9.7	14.29	5.89	6.38	gi|695043016|ref|XP_009409183.1| PREDICTED: protein FAF-like, chloroplastic [Musa acuminata subsp. malaccensis]
c262568_g1	99.36	25.38	27.57	28.29	18.59	6.89	17.33	18.35	10.6	gi|695020733|ref|XP_009397429.1| PREDICTED: uncharacterized protein LOC103982267 [Musa acuminata subsp. malaccensis]
c136553_g2	99.32	75.34	78.08	70.99	191.39	192.78	46.79	65.16	61.97	gi|695077719|ref|XP_009386215.1| PREDICTED: malate dehydrogenase [NADP], chloroplastic-like [Musa acuminata subsp. malaccensis]
c140881_g2	99.27	90.75	75.21	65.25	52.94	60.48	62.66	57.85	54.09	gi|720080967|ref|XP_010242133.1| PREDICTED: ubiquitin domain-containing protein 1-like [Nelumbo nucifera]
c76182_g1	99.24	97.35	96.03	126.17	112.17	76.4	82.82	85.88	76.57	gi|720058449|ref|XP_010274288.1| PREDICTED: subtilisin-like protease SBT5.3 [Nelumbo nucifera]
c72083_g1	99.15	26.88	28.25	87.2	28.69	41.87	85.25	20.25	29.32	gi|870847615|gb|KMS99962.1| hypothetical protein BVRB_1g018040 isoform B [Beta vulgaris subsp. vulgaris]
c145064_g1	99.13	348.38	348.86	47	53.44	58.05	52.38	83.09	87.21	gi|694452446|ref|XP_009351168.1| PREDICTED: nuA4 complex subunit EAF3 homolog [Pyrus x bretschneideri]
c131664_g1	99.12	691.07	714.76	39.3	393.7	400.6	42.25	367.39	349.86	gi|743884569|ref|XP_010909722.1| PREDICTED: 1,2-dihydroxy-3-keto-5-methylthiopentene dioxygenase 1-like isoform X2 [Elaeis guineensis]
c139807_g1	99.12	56.4	60.03	108.53	79.12	70.25	139.31	59.75	70.65	-
c136395_g4	99.09	87.09	86.99	38.67	30.42	30.67	46.3	37.3	35.17	gi|672115719|ref|XP_008781004.1| PREDICTED: thaumatin-like protein 1 [Phoenix dactylifera]
c143213_g2	99.09	55.66	59.2	70.88	42.04	40.98	73.59	41.87	44.93	gi|672160080|ref|XP_008799812.1| PREDICTED: LOW QUALITY PROTEIN: sorting nexin 2B, partial [Phoenix dactylifera]
c144033_g1	99.05	45.79	45.38	229.22	125.31	125.12	115.08	56.85	59.47	-
c132830_g8	98.9	86.9	98.86	124.82	119.82	107.69	646.8	630.8	591.88	gi|604856315|gb|AHV84769.1| tubulin 8, partial [Codiaeum variegatum]
c138516_g4	98.87	244.04	241.03	29.39	127.65	126.34	56.12	148.22	139.97	gi|567918322|ref|XP_006451167.1| hypothetical protein CICLE_v10009505mg [Citrus clementina] gi|557554393|gb|ESR64407.1| hypothetical protein CICLE_v10009505mg [Citrus clementina]
c131955_g2	98.87	51.95	55.85	46.27	33.09	29.7	55.85	36.25	39	gi|743846790|ref|XP_010938931.1| PREDICTED: uncharacterized protein LOC105057911 [Elaeis guineensis]
c47741_g1	98.86	83.86	65.7	9.44	6.56	7.32	59.79	89.85	51.79	-
c129473_g1	98.86	79.97	79.76	24.38	22.73	19.66	57.02	41.3	45.86	gi|743763501|ref|XP_010911938.1| PREDICTED: uncharacterized protein LOC105037985 [Elaeis guineensis]
c87868_g1	98.81	91.54	93.59	54.77	55.4	47.36	48.54	55.74	44.4	gi|658043051|ref|XP_008357155.1| PREDICTED: 5&apos;-3&apos; exoribonuclease 3-like [Malus domestica]
c135628_g2	98.77	61.77	52.43	21.09	16.35	10.57	99.13	51.3	52.75	gi|672180106|ref|XP_008810235.1| PREDICTED: truncated transcription factor CAULIFLOWER A-like isoform X1 [Phoenix dactylifera]
c125051_g1	98.73	40.93	44.78	70.76	33.53	33.07	89.71	44.07	39.07	gi|672148263|ref|XP_008797172.1| PREDICTED: uncharacterized protein At1g01500-like [Phoenix dactylifera]
c136997_g1	98.71	147.08	157.07	51	101.96	99.94	80.74	137.83	132.75	gi|743826793|ref|XP_010933404.1| PREDICTED: 6-phosphogluconate dehydrogenase, decarboxylating 1-like [Elaeis guineensis] gi|743826796|ref|XP_010933405.1| PREDICTED: 6-phosphogluconate dehydrogenase, decarboxylating 1-like [Elaeis guineensis]
c143423_g4	98.7	53.8	47.71	69.62	41.44	37.76	57.57	25.1	24.67	gi|672111926|ref|XP_008803158.1| PREDICTED: LOW QUALITY PROTEIN: uncharacterized protein LOC103716776 [Phoenix dactylifera]
c131280_g1	98.66	78.05	73.76	31.68	29.76	29.18	74.42	63.19	65.01	gi|672181014|ref|XP_008810711.1| PREDICTED: probable 6-phosphogluconolactonase 4, chloroplastic [Phoenix dactylifera] gi|672181016|ref|XP_008810712.1| PREDICTED: probable 6-phosphogluconolactonase 4, chloroplastic [Phoenix dactylifera]
c143659_g3	98.63	80.64	89.31	26.12	34.5	31.99	27.95	31.61	27.55	gi|743760979|ref|XP_010939889.1| PREDICTED: probable protein phosphatase 2C 78 [Elaeis guineensis]
c135191_g7	98.55	57.85	73.55	50.09	17.07	15.09	181.16	156.16	190	gi|47026912|gb|AAT08677.1| histone H2A [Hyacinthus orientalis]
c89068_g1	98.45	19.18	15.05	57.82	13.84	13.66	71.41	19.99	11.98	-
c132767_g1	98.41	131.03	127.68	62.4	96.66	95.56	98.58	111.32	114.87	gi|743874835|ref|XP_010907177.1| PREDICTED: uncharacterized protein LOC105033903 [Elaeis guineensis]
c140862_g3	98.41	151.72	140.42	80.94	174.15	167.82	41.02	91.05	97.3	gi|731404409|ref|XP_010655423.1| PREDICTED: inositol monophosphatase 3 [Vitis vinifera]
c137503_g2	98.38	95.57	103.68	24.99	33.28	34.15	54.58	57.96	47.82	gi|695017753|ref|XP_009395820.1| PREDICTED: casein kinase I isoform delta-like isoform X1 [Musa acuminata subsp. malaccensis]
c128358_g1	98.37	53.51	51.86	3.46	1.07	1.6	2.9	0.79	0.67	gi|743756426|ref|XP_010916734.1| PREDICTED: probable WRKY transcription factor 65 [Elaeis guineensis]
c126720_g1	98.37	52.96	50.56	28.18	9.25	10.76	175.1	68.73	71.63	-
c140404_g3	98.35	109.41	114.98	27.28	34.49	33.82	62.11	80.07	79.1	gi|695068442|ref|XP_009381164.1| PREDICTED: probable E3 ubiquitin ligase complex SCF subunit sconB [Musa acuminata subsp. malaccensis]
c110223_g1	98.34	86.34	85.54	3.33	2.63	2.09	13.63	10.26	8.49	gi|703150494|ref|XP_010109875.1| Zinc transporter 1 [Morus notabilis] gi|587938034|gb|EXC24818.1| Zinc transporter 1 [Morus notabilis]
c141263_g1	98.33	89.81	94.56	62.87	50.56	45.68	98.56	87.13	89.99	gi|514749914|ref|XP_004961975.1| PREDICTED: uncharacterized protein At5g49945-like [Setaria italica] gi|944251084|gb|KQL15347.1| hypothetical protein SETIT_021893mg [Setaria italica] gi|944251085|gb|KQL15348.1| hypothetical protein SETIT_021893mg [Setaria italica]
c148266_g2	98.31	169.33	172.53	70.69	138.16	149.21	126.65	225.44	215.57	gi|743798793|ref|XP_010925323.1| PREDICTED: coatomer subunit beta&apos;-1-like isoform X1 [Elaeis guineensis]
c142067_g5	98.26	48.86	52.64	58.07	30.34	35.91	122.11	58.6	66.84	gi|743828255|ref|XP_010933813.1| PREDICTED: serine/arginine-rich splicing factor RS31-like [Elaeis guineensis] gi|743828259|ref|XP_010933814.1| PREDICTED: serine/arginine-rich splicing factor RS31-like [Elaeis guineensis] gi|743828265|ref|XP_010933815.1| PREDICTED: serine/arginine-rich splicing factor RS31-like [Elaeis guineensis] gi|743828269|ref|XP_010933816.1| PREDICTED: serine/arginine-rich s…
c147423_g2	98.25	83.25	72.37	49.67	37.59	44.67	87.84	84.89	79.84	gi|720013227|ref|XP_010260102.1| PREDICTED: zinc finger protein GIS2-like [Nelumbo nucifera]
c146772_g1	98.22	107.62	120.17	46.11	62.82	67.18	34.28	49.22	47.31	gi|743804045|ref|XP_010927089.1| PREDICTED: lecithin-cholesterol acyltransferase-like 4 [Elaeis guineensis]
c138966_g3	98.17	83.17	84.19	86.26	72.88	81.26	222.18	188.47	214.18	-
c142692_g2	98.09	83.09	84.19	46.96	43.81	41.96	79.74	66.42	71.74	gi|548850097|gb|ERN08649.1| hypothetical protein AMTR_s00017p00206780 [Amborella trichopoda]
c147353_g1	97.99	120.28	122.07	46.39	50.49	58.11	82.02	107.44	103.23	gi|920696306|gb|KOM39531.1| hypothetical protein LR48_Vigan03g291300 [Vigna angularis]
c144766_g2	97.97	133.04	131.09	62.83	89.28	91.2	76.01	109.45	115.49	gi|548839068|gb|ERM99382.1| hypothetical protein AMTR_s00131p00018630 [Amborella trichopoda]
c134693_g1	97.94	62.91	75.46	46.7	30.33	32.46	32.07	21.84	23.24	gi|695022833|ref|XP_009398560.1| PREDICTED: uncharacterized protein LOC103983117 [Musa acuminata subsp. malaccensis]
c134986_g3	97.91	70.99	71.54	43.22	36.26	35.28	72.13	49.95	51.91	gi|743757937|ref|XP_010924269.1| PREDICTED: 2-hydroxyacyl-CoA lyase-like [Elaeis guineensis]
c147254_g6	97.87	48.22	51.93	27.43	19.56	20.04	45.85	26.05	20.09	gi|769813540|ref|XP_006843194.2| PREDICTED: serine/threonine-protein kinase tricorner isoform X1 [Amborella trichopoda]
c137576_g5	97.82	69.84	69.05	74.15	63.13	66.28	39.8	28.29	32.22	gi|743759729|ref|XP_010933514.1| PREDICTED: uncharacterized protein LOC105053881 [Elaeis guineensis]
c94326_g1	97.8	64	61.86	79.38	47.12	49.85	242.06	160.1	152.03	-
c35300_g1	97.79	82.54	72.79	131.49	35.12	96.49	92.11	67.11	91.83	gi|1002312986|ref|XP_015619874.1| PREDICTED: cytochrome c oxidase subunit 5C [Oryza sativa Japonica Group] gi|48428177|sp|Q9SXX7.3|COX5C_ORYSJ RecName: Full=Cytochrome c oxidase subunit 5C; AltName: Full=Cytochrome c oxidase polypeptide Vc gi|4850330|dbj|BAA77682.1| cytochrome c oxidase subunit 5c [Oryza sativa Japonica Group] gi|113649528|dbj|BAF30040.1| Os12g0561000 [Oryza sativa Japonica Group…
c138417_g4	97.65	85.65	93.57	52.74	47.74	40.86	52.25	36.25	25.9	gi|672164742|ref|XP_008802258.1| PREDICTED: uridine kinase-like protein 1, chloroplastic [Phoenix dactylifera]
c147049_g6	97.65	125.59	127.6	39.82	74.84	72.62	75.81	120.29	126.54	gi|1021558152|ref|XP_016170392.1| PREDICTED: LOW QUALITY PROTEIN: serine/arginine-rich splicing factor SR45a-like [Arachis ipaensis]
c131230_g8	97.64	85.64	79.87	54.1	49.1	46.38	204.87	188.87	217.64	gi|743918324|ref|XP_011003162.1| PREDICTED: ubiquitin-40S ribosomal protein S27a-like [Populus euphratica]
c107843_g1	97.64	283.95	273.86	4.66	18.35	19.24	4.43	16.23	26.05	-
c147446_g2	97.61	49.54	48.34	70.01	36.8	35.18	132.71	57.66	62.07	-
c146090_g4	97.6	171.22	169.24	116.75	245.47	236.88	92.45	164.28	167.65	gi|743755465|ref|XP_010911246.1| PREDICTED: vacuolar-processing enzyme [Elaeis guineensis]
c149962_g1	97.58	169.02	151.5	67.08	129.49	130.27	138.42	202.91	212.85	gi|743778306|ref|XP_010919610.1| PREDICTED: coatomer subunit alpha-1 [Elaeis guineensis] gi|743778308|ref|XP_010919611.1| PREDICTED: coatomer subunit alpha-1 [Elaeis guineensis] gi|743778310|ref|XP_010919612.1| PREDICTED: coatomer subunit alpha-1 [Elaeis guineensis]
c68989_g1	97.58	75.95	78.59	39.94	40.4	36.96	96.96	60.47	67.47	gi|720047047|ref|XP_010270687.1| PREDICTED: splicing factor U2af small subunit A, partial [Nelumbo nucifera]
c136813_g2	97.57	86.42	83.92	40.82	32.08	34.24	87.59	74.83	73.88	gi|743881029|ref|XP_010908797.1| PREDICTED: galacturonosyltransferase 8-like [Elaeis guineensis]
c149887_g1	97.55	46.31	47.24	66.43	55.21	50.93	63.64	49.75	35.4	gi|147856403|emb|CAN80324.1| hypothetical protein VITISV_015014 [Vitis vinifera]
c137991_g1	97.53	32.82	37.04	54.62	22.14	24.73	78.3	27.52	27.59	gi|695031972|ref|XP_009403515.1| PREDICTED: pyridine nucleotide-disulfide oxidoreductase domain-containing protein 2 [Musa acuminata subsp. malaccensis]
c137714_g1	97.47	85.47	94.21	137.7	57.27	129.7	82.31	73.31	98.38	gi|1035937198|gb|OAY65118.1| Nicotinate phosphoribosyltransferase 2 [Ananas comosus]
c142284_g3	97.46	123.01	128.88	22.86	28.36	28.68	59.86	69.71	72.72	gi|695014006|ref|XP_009393807.1| PREDICTED: V-type proton ATPase 16 kDa proteolipid subunit-like [Musa acuminata subsp. malaccensis]
c149096_g3	97.45	97.9	91.84	24.19	46.35	41.98	48.55	38.94	40.07	gi|672140033|ref|XP_008793821.1| PREDICTED: nuclear-pore anchor isoform X2 [Phoenix dactylifera]
c129870_g1	97.43	92.26	92.21	56.9	50	49.49	90.6	83.05	86.46	gi|720016431|ref|XP_010261157.1| PREDICTED: UBP1-associated protein 2A-like [Nelumbo nucifera]
c151291_g1	97.34	58.35	65.47	24.19	11.89	21.42	171.52	97.11	108.68	gi|697142586|ref|XP_009625399.1| PREDICTED: adenosine kinase 2 [Nicotiana tomentosiformis] gi|51949804|gb|AAU14834.1| adenosine kinase isoform 2T [Nicotiana tabacum] gi|51949806|gb|AAU14835.1| adenosine kinase isoform 2T [Nicotiana tabacum]
c136675_g1	97.22	154.43	153.92	9.94	11.51	11.65	157.92	178.57	177.61	gi|1035935050|gb|OAY64007.1| Cytochrome P450 71A9 [Ananas comosus]
c125554_g1	97.18	82.18	61.15	12.99	9.2	7.99	86.45	74.59	78.45	-
c200601_g1	97.17	29.17	32.27	66.15	11.2	18.35	40.65	5.58	8.7	gi|674905703|emb|CDY27367.1| BnaC04g50380D [Brassica napus]
c141888_g4	97.17	110.86	113.31	27.85	52	42.58	39.18	48.21	47.85	gi|743756679|ref|XP_010918160.1| PREDICTED: UDP-glucose 4-epimerase GEPI48-like [Elaeis guineensis]
c150793_g5	97.11	63.25	59.57	96.42	60	60.67	97.03	42.14	41.33	gi|147807800|emb|CAN71056.1| hypothetical protein VITISV_016917 [Vitis vinifera]
c132920_g2	97.09	135.47	139.88	27.8	46.15	43.19	119.8	187.43	188.52	gi|743883178|ref|XP_010909342.1| PREDICTED: histone deacetylase HDT2-like isoform X2 [Elaeis guineensis]
c146357_g2	97.05	36.62	36.86	63.01	27.81	26.27	78.14	33.64	35.1	-
c121483_g1	96.94	41.74	32.91	73.13	43.48	40.33	120.8	40.95	52.08	-
c140177_g4	96.71	81.71	80.88	42.37	42.76	37.37	1290.53	1179.41	1282.53	gi|218454142|gb|ACK76695.1| peroxidase, partial [Pyrus x bretschneideri] gi|218454144|gb|ACK76696.1| peroxidase, partial [Pyrus pyrifolia]
c145583_g1	96.69	220.94	216.32	54.58	162.05	141.98	191.18	447.08	445.37	gi|719964384|ref|XP_010252496.1| PREDICTED: molybdate-anion transporter-like [Nelumbo nucifera]
c139225_g5	96.65	84.65	86.24	22.53	15.73	14.53	28.24	19.24	18.66	gi|743799352|ref|XP_010925452.1| PREDICTED: zinc transporter 7-like [Elaeis guineensis]
c147895_g5	96.64	83.58	85.82	48.77	51.37	48.16	54.46	50.89	50.3	gi|743867604|ref|XP_010905359.1| PREDICTED: coronatine-insensitive protein 1-like [Elaeis guineensis] gi|743867608|ref|XP_010905360.1| PREDICTED: coronatine-insensitive protein 1-like [Elaeis guineensis]
c93264_g1	96.59	12.41	25.65	34.01	6.07	9.1	41.58	5.31	7.45	gi|743761832|ref|XP_010905064.1| PREDICTED: sphingosine kinase 1-like isoform X1 [Elaeis guineensis]
c142919_g2	96.56	189.62	194.83	43.05	97.05	101	57.93	122.91	122.28	gi|502152762|ref|XP_004509081.1| PREDICTED: casein kinase II subunit alpha [Cicer arietinum]
c78417_g1	96.55	15.75	14.54	79.66	7.9	9.76	92.02	8.66	12.75	gi|802586883|ref|XP_012070701.1| PREDICTED: thioredoxin-like protein YLS8 [Jatropha curcas] gi|643731814|gb|KDP39006.1| hypothetical protein JCGZ_00763 [Jatropha curcas]
c140793_g2	96.51	91.51	90.67	14.65	6.65	8.48	51.44	42.49	44.44	gi|695073543|ref|XP_009383943.1| PREDICTED: galactinol synthase 1-like [Musa acuminata subsp. malaccensis]
c138386_g1	96.48	72.66	65.04	41.07	32.39	30.81	74.59	62.82	62.61	gi|743772795|ref|XP_010916710.1| PREDICTED: cytochrome c oxidase subunit 6b-1-like isoform X1 [Elaeis guineensis]
c137563_g1	96.4	91.4	92.43	40.08	32.08	29.98	63.4	54.88	56.4	gi|672111607|ref|XP_008801509.1| PREDICTED: LOW QUALITY PROTEIN: F-box/kelch-repeat protein SKIP20-like [Phoenix dactylifera]
c137689_g3	96.37	98.92	78.37	27.35	22.35	8.03	68.61	72.63	50.61	gi|1035946003|gb|OAY70489.1| Aldose 1-epimerase [Ananas comosus]
c128262_g1	96.24	112.59	106.19	59.4	42.23	65.25	135.61	116.72	113.95	gi|720021394|ref|XP_010262714.1| PREDICTED: nuclear receptor coactivator 6-like isoform X1 [Nelumbo nucifera]
c141191_g3	96.23	169.61	168.67	22.02	47.62	44.96	39.43	68.64	66.76	gi|1035964548|gb|OAY84923.1| Methylmalonate-semialdehyde dehydrogenase (acylating), mitochondrial [Ananas comosus]
c149064_g2	96.23	68.01	68.29	46.27	39.24	44.34	66.34	57.78	57.73	gi|976905128|gb|KVH92772.1| Aldolase-type TIM barrel [Cynara cardunculus var. scolymus]
c104264_g2	96.22	24.31	21.64	60.26	18.16	8.24	71.01	23.04	21.62	gi|645272181|ref|XP_008241272.1| PREDICTED: monodehydroascorbate reductase [Prunus mume]
c131779_g1	96.19	81.19	76.96	39.47	41.79	34.47	619.38	608.5	611.38	gi|1025151661|ref|XP_016473209.1| PREDICTED: gibberellin-regulated protein 6-like [Nicotiana tabacum]
c146398_g2	96.17	102.34	95.8	53.09	22.25	27.8	185.5	83.62	85.64	gi|695027197|ref|XP_009400928.1| PREDICTED: 60S ribosomal protein L37-1-like [Musa acuminata subsp. malaccensis]
c129820_g1	96.14	53.84	49.92	80.58	41.24	45.68	97.46	61.1	61.59	gi|672146594|ref|XP_008797052.1| PREDICTED: peroxiredoxin-2F, mitochondrial [Phoenix dactylifera]
c65217_g1	96.1	50.59	50.91	43.62	27.54	21.25	90.59	69.72	63.28	-
c120733_g1	96.1	27.75	24.48	21.88	7.54	9.28	49.96	13.14	15.2	gi|672109107|ref|XP_008788500.1| PREDICTED: transcription factor HBP-1a-like isoform X3 [Phoenix dactylifera]
c131001_g3	96.03	36.35	27.41	43.98	17.77	17.88	72.66	28.41	29.39	gi|356526926|ref|XP_003532066.1| PREDICTED: reactive oxygen species modulator 1-like [Glycine max] gi|947097354|gb|KRH45939.1| hypothetical protein GLYMA_08G302200 [Glycine max]
c136446_g1	95.97	80.96	90.75	79.1	50.68	71.69	62.49	72.26	58.35	gi|672111486|ref|XP_008800912.1| PREDICTED: probable V-type proton ATPase subunit H [Phoenix dactylifera]
c133390_g2	95.9	90.9	92.25	72.26	64.26	68.52	266.03	273.33	259.03	gi|224060503|ref|XP_002300225.1| ribosomal protein S16 [Populus trichocarpa] gi|743912485|ref|XP_011000124.1| PREDICTED: 40S ribosomal protein S16 [Populus euphratica] gi|118481666|gb|ABK92774.1| unknown [Populus trichocarpa] gi|118483691|gb|ABK93739.1| unknown [Populus trichocarpa] gi|118487129|gb|ABK95393.1| unknown [Populus trichocarpa] gi|222847483|gb|EEE85030.1| ribosomal protein S16 [Populu…
c133618_g2	95.83	56.09	51.7	44.28	33.27	27.23	96.29	56.48	56.94	gi|1024005692|gb|KZV31654.1| cytochrome b-c1 complex subunit 7 [Dorcoceras hygrometricum]
c146257_g1	95.8	552.84	527.17	0.78	5.17	12.48	385.7	2258.22	2226.3	gi|695013884|ref|XP_009393741.1| PREDICTED: probable 2-oxoglutarate-dependent dioxygenase At3g49630 [Musa acuminata subsp. malaccensis]
c136253_g2	95.8	71.75	69.65	156.88	140.26	124.7	259.73	148.27	158.23	gi|743837197|ref|XP_010936328.1| PREDICTED: biotin carboxyl carrier protein of acetyl-CoA carboxylase, chloroplastic isoform X1 [Elaeis guineensis]
c137173_g1	95.79	87.27	90.29	33.18	20.87	18.31	90.59	85.23	82.02	gi|743872681|ref|XP_010906615.1| PREDICTED: BAG family molecular chaperone regulator 7 [Elaeis guineensis]
c115767_g1	95.71	87.71	94.18	29.46	14.46	19.94	33.2	45.2	42.99	-
c111645_g1	95.68	63.55	79.29	12.49	11.7	8.09	51.11	44.57	46.24	gi|238014950|gb|ACR38510.1| unknown [Zea mays] gi|414585900|tpg|DAA36471.1| TPA: hypothetical protein ZEAMMB73_448658 [Zea mays]
c129260_g1	95.68	53.86	55.27	99.58	77.16	62.15	99.92	61.96	63.07	gi|371721820|gb|AEX55233.1| cold-regulated gibberellin-regulated protein 1 LTCOR12 [Allium sativum]
c84687_g1	95.65	32.54	25.02	94.93	50.14	27.2	143.15	44.61	43.62	gi|695008870|ref|XP_009391039.1| PREDICTED: transcription factor GTE7-like [Musa acuminata subsp. malaccensis]
c141868_g2	95.59	260.22	275.34	39.01	123.01	121.02	45.03	128.38	136.72	gi|672145348|ref|XP_008796589.1| PREDICTED: uncharacterized protein LOC103712004 [Phoenix dactylifera]
c112089_g1	95.58	41.83	56.32	0.43	0	0	1.31	0.62	0	gi|672124192|ref|XP_008785470.1| PREDICTED: UDP-glycosyltransferase 85A5-like [Phoenix dactylifera]
c130947_g1	95.57	71.19	61.57	16.36	7.36	17.84	25.89	24.6	39.89	-
c124127_g1	95.5	36.88	40.49	46.6	18.71	20.92	76.28	33.21	31.37	gi|1035901355|gb|OAY30955.1| hypothetical protein MANES_14G071800 [Manihot esculenta]
c135084_g2	95.43	100.53	75.28	64.32	15.19	19.99	90.35	34.84	46.12	gi|695026444|ref|XP_009400519.1| PREDICTED: potassium channel KAT4-like [Musa acuminata subsp. malaccensis]
c116792_g1	95.35	80.35	72.57	48.58	38.76	43.58	75.96	66.96	67.96	gi|657942779|ref|XP_008337927.1| PREDICTED: uncharacterized protein LOC103400976 [Malus domestica] gi|657942781|ref|XP_008337998.1| PREDICTED: uncharacterized protein LOC103400976 [Malus domestica] gi|657968422|ref|XP_008375913.1| PREDICTED: uncharacterized protein LOC103439139 [Malus domestica]
c83259_g1	95.31	87.31	127.43	27.41	12.41	11.96	154.75	166.75	145.59	gi|763800075|gb|KJB67030.1| hypothetical protein B456_010G171000 [Gossypium raimondii]
c129308_g2	95.18	179.53	189.55	32.15	86.93	100.53	94.7	239.81	224.16	gi|1035961773|gb|OAY82480.1| Peptidyl-prolyl cis-trans isomerase FKBP15-1 [Ananas comosus]
c76604_g1	95.1	65.14	62.69	30.41	29.04	24.31	73.88	50.01	54.72	gi|341605580|gb|AEK84143.1| ethylene insensitive 3-like protein [Oncidium hybrid cultivar]
c132042_g2	95.03	87.03	86.32	25.42	10.42	10.88	16.45	14.95	13.63	gi|695076801|ref|XP_009385708.1| PREDICTED: cytidine deaminase 1-like [Musa acuminata subsp. malaccensis]
c147761_g3	95	57.65	61.21	76.91	52.23	55.67	89.16	55.1	36.59	gi|694994547|ref|XP_009408278.1| PREDICTED: DEAD-box ATP-dependent RNA helicase 6 [Musa acuminata subsp. malaccensis]
c145391_g6	94.9	98.55	91.55	53.28	76.22	76.05	89.83	92.98	93.73	gi|720065792|ref|XP_010276375.1| PREDICTED: uncharacterized protein LOC104611142 [Nelumbo nucifera]
c131449_g1	94.85	88.12	84.38	59.8	61.26	61.86	187.84	135.94	125.41	-
c140184_g4	94.85	79.85	81.03	56.01	59.68	51.01	106.59	99.38	98.59	gi|672189454|ref|XP_008774998.1| PREDICTED: uncharacterized protein LOC103695443 isoform X1 [Phoenix dactylifera]
c143117_g3	94.81	45.4	51.31	58.92	36.34	34.48	91.85	43.45	44.33	gi|743862389|ref|XP_010943521.1| PREDICTED: uncharacterized protein LOC105061234 isoform X1 [Elaeis guineensis]
c137481_g2	94.78	211.76	224.04	26.54	78.53	79.31	36.24	83.21	90.06	gi|242036919|ref|XP_002465854.1| hypothetical protein SORBIDRAFT_01g047040 [Sorghum bicolor] gi|241919708|gb|EER92852.1| hypothetical protein SORBI_001G503500 [Sorghum bicolor]
c145129_g2	94.77	89.77	101.96	75.88	67.88	71.71	309.36	293.59	302.36	gi|565461548|ref|XP_006288773.1| hypothetical protein CARUB_v10002094mg, partial [Capsella rubella] gi|482557479|gb|EOA21671.1| hypothetical protein CARUB_v10002094mg, partial [Capsella rubella]
c129695_g2	94.72	62.09	56.42	15.53	13.78	10.7	111.29	76.31	77.72	gi|743850435|ref|XP_010939885.1| PREDICTED: protein TIFY 10B-like [Elaeis guineensis]
c145758_g1	94.71	82.71	74.29	124.47	120.73	116.47	34.4	25.4	18.02	gi|743777844|ref|XP_010919362.1| PREDICTED: cytochrome P450 89A2-like [Elaeis guineensis]
c283534_g1	94.65	102.86	100.39	6.71	4.23	10.26	13.12	16.88	14.14	-
c145602_g2	94.64	126.59	131.11	43.01	66.54	69.54	95.14	139.88	140.13	gi|1001822683|gb|AMM04380.1| UDP-D-apiose/UDP-D-xylose synthase [Ornithogalum longebracteatum]
c146327_g3	94.54	78.64	77.12	45.69	42.93	43.54	80.54	74.52	74.38	gi|743762023|ref|XP_010906041.1| PREDICTED: alpha N-terminal protein methyltransferase 1 isoform X1 [Elaeis guineensis]
c146105_g4	94.53	256.84	269.05	3.03	8.13	8.36	8.38	37.29	40.31	gi|743885125|ref|XP_010909849.1| PREDICTED: solute carrier family 35 member F1-like [Elaeis guineensis] gi|743885128|ref|XP_010909851.1| PREDICTED: solute carrier family 35 member F1-like [Elaeis guineensis]
c255344_g1	94.46	19.95	19.49	71.5	24	19.88	105.14	31.1	30.47	gi|695080041|ref|XP_009387460.1| PREDICTED: F-box protein AFR [Musa acuminata subsp. malaccensis]
c147544_g1	94.41	110.46	112.07	52.37	90.83	90.49	53.85	63.49	64.12	gi|747041803|ref|XP_011075207.1| PREDICTED: neutral alpha-glucosidase C [Sesamum indicum]
c118357_g1	94.37	79.37	73.21	34.97	31	29.97	70.78	58.8	62.78	gi|695013227|ref|XP_009393390.1| PREDICTED: uncharacterized protein At2g27730, mitochondrial-like isoform X2 [Musa acuminata subsp. malaccensis]
c143859_g2	94.34	308.81	317.2	65.55	318.49	300.2	151.86	635.77	646.67	gi|743870715|ref|XP_010906116.1| PREDICTED: probable cellulose synthase A catalytic subunit 8 [UDP-forming] [Elaeis guineensis] gi|743870719|ref|XP_010906117.1| PREDICTED: probable cellulose synthase A catalytic subunit 8 [UDP-forming] [Elaeis guineensis]
c125980_g2	94.19	54.44	48.19	28.42	19.86	17.72	105.96	66.6	67.88	gi|743846516|ref|XP_010938857.1| PREDICTED: histone H2AX [Elaeis guineensis]
c140264_g10	94.18	68.29	66.95	197.77	147.71	149.53	54.91	37.11	35.53	gi|695029577|ref|XP_009402217.1| PREDICTED: protein LURP-one-related 15-like [Musa acuminata subsp. malaccensis]
c140908_g3	94.14	41.37	41.28	271.17	145.51	148.9	88.91	53.65	52.18	gi|672175094|ref|XP_008807605.1| PREDICTED: probable ribose-5-phosphate isomerase 2 [Phoenix dactylifera]
c147743_g1	94.13	201.13	221.6	38.54	148.73	146.46	54.75	192.86	172.57	gi|743771255|ref|XP_010915915.1| PREDICTED: ABC transporter E family member 2-like [Elaeis guineensis]
c141935_g5	94.1	65.63	73.76	157.42	123.73	114.52	125.86	98.87	83.01	gi|695064886|ref|XP_009421014.1| PREDICTED: uncharacterized protein At3g15000, mitochondrial-like [Musa acuminata subsp. malaccensis]
c128869_g1	94.1	37.28	38.07	209.06	81.15	84.55	297.81	133.91	126.64	gi|118489125|gb|ABK96369.1| unknown [Populus trichocarpa x Populus deltoides]
c135419_g1	94.08	54.21	57.51	445.18	268.45	285.58	103.72	59.18	56.83	-
c146430_g2	94.06	77.56	90.85	86.09	72.09	74.24	273.33	277.39	267.08	gi|672161692|ref|XP_008800672.1| PREDICTED: 60S acidic ribosomal protein P1-like [Phoenix dactylifera] gi|672161694|ref|XP_008800673.1| PREDICTED: 60S acidic ribosomal protein P1-like [Phoenix dactylifera]
c127041_g1	94.05	21.91	23.6	94.05	32.02	43.01	141.91	42.65	38.55	-
c141629_g1	93.98	35.79	42.38	0	0.12	0	0.26	0.85	0	gi|743778382|ref|XP_010919650.1| PREDICTED: expansin-B18-like [Elaeis guineensis]
c138747_g1	93.91	47.49	49.07	187.49	99.97	102.3	128.92	76.94	72.56	gi|743795909|ref|XP_010924598.1| PREDICTED: CBL-interacting protein kinase 19-like [Elaeis guineensis]
c148621_g2	93.77	66.08	62.28	66.51	56.81	42.51	91.52	27.12	62.93	gi|7649389|emb|CAB89082.1| S6 ribosomal protein kinase [Asparagus officinalis]
c137525_g6	93.76	81.76	98.21	43.24	38.24	48.99	203.37	187.37	190.3	gi|672137444|ref|XP_008792450.1| PREDICTED: 60S ribosomal protein L30-like [Phoenix dactylifera]
c135432_g2	93.72	72.2	71.53	17.32	15.91	18.47	29.42	28.12	29.99	gi|1035959563|gb|OAY80616.1| MADS-box transcription factor 14 [Ananas comosus]
c145005_g2	93.7	73.8	76.43	63.16	52.18	55.14	68.24	55.69	52.89	gi|731365020|ref|XP_010694296.1| PREDICTED: uncharacterized protein At5g01610 [Beta vulgaris subsp. vulgaris] gi|731365022|ref|XP_010694297.1| PREDICTED: uncharacterized protein At5g01610 [Beta vulgaris subsp. vulgaris] gi|870845906|gb|KMS98558.1| hypothetical protein BVRB_4g092470 [Beta vulgaris subsp. vulgaris]
c131987_g3	93.67	76.03	77.33	120.52	114.26	112.18	60.91	48.85	49.41	-
c145353_g3	93.6	85.6	99.32	62.75	47.75	54.42	66.21	78.21	88.39	gi|661889306|emb|CDP06893.1| unnamed protein product [Coffea canephora]
c111082_g1	93.6	78.6	64.12	70.72	32.02	65.72	102.31	89.32	94.31	gi|695051475|ref|XP_009413764.1| PREDICTED: peptidyl-prolyl cis-trans isomerase Pin1-like [Musa acuminata subsp. malaccensis]
c140464_g1	93.6	84.47	80.42	66.71	73.84	66.55	105.26	91.41	91.85	gi|743756731|ref|XP_010918395.1| PREDICTED: far upstream element-binding protein 3-like [Elaeis guineensis]
c111796_g2	93.45	30.67	27	4.43	2.04	1.08	0.89	0.22	0	gi|672138235|ref|XP_008792867.1| PREDICTED: uncharacterized protein LOC103709344 [Phoenix dactylifera]
c94396_g1	93.41	88.41	85.87	43.72	35.72	31.94	73.52	73.23	66.52	-
c136963_g1	93.38	81.38	80.68	30.03	21.24	22.03	83.06	74.06	79.36	gi|672175610|ref|XP_008807866.1| PREDICTED: uncharacterized protein LOC103720099 isoform X2 [Phoenix dactylifera]
c140829_g3	93.26	75.9	90.05	76.25	62.25	61.18	116.83	106.21	110.58	gi|672176352|ref|XP_008808248.1| PREDICTED: endo-1,3;1,4-beta-D-glucanase-like isoform X1 [Phoenix dactylifera]
c144328_g1	93.23	84.71	72.67	138.32	126.01	116.76	113.64	126.25	105.07	-
c145141_g2	93.23	44.96	44.22	52.02	24.06	24.35	109.23	65.64	64.7	gi|743807097|ref|XP_010927974.1| PREDICTED: tetraspanin-8-like [Elaeis guineensis]
c143495_g1	93.21	40.87	33.64	35.3	23.12	23.76	122.61	41.66	40.94	gi|695076501|ref|XP_009385546.1| PREDICTED: pyruvate decarboxylase 1-like [Musa acuminata subsp. malaccensis]
c149072_g1	93.2	84.12	87.98	43.41	37.41	36	71.05	66.48	66.91	gi|672185981|ref|XP_008812966.1| PREDICTED: LOW QUALITY PROTEIN: SNW/SKI-interacting protein-like [Phoenix dactylifera]
c135153_g1	93.2	59.4	62.31	62.55	41.67	39.62	153.91	81.15	78.45	gi|284520870|gb|ADB93024.1| leucine-rich repeat receptor-like protein kinase, partial [Dendrobium nobile]
c136655_g2	93.19	30.13	29.31	63.13	18.55	22.23	83.81	30.6	33.24	gi|672195557|ref|XP_008776573.1| PREDICTED: uncharacterized protein At2g27730, mitochondrial [Phoenix dactylifera]
c147014_g2	93.12	35.32	37.06	30.73	12.89	12.59	59.83	24.41	15.6	gi|672115382|ref|XP_008780649.1| PREDICTED: FAM203 family protein DDB_G0276861 [Phoenix dactylifera]
c141398_g1	93.12	43.3	50.4	45.92	25.91	27.11	85.05	47.27	41.85	gi|743820774|ref|XP_010931868.1| PREDICTED: organic cation/carnitine transporter 4 [Elaeis guineensis]
c127635_g2	93.07	84.55	76.45	231.67	219.36	214.93	170.01	152.02	161.44	gi|743805125|ref|XP_010927361.1| PREDICTED: vacuolar cation/proton exchanger 1a-like isoform X3 [Elaeis guineensis]
c144608_g1	93.07	92.88	90.23	30.79	34.98	36.57	41.99	46.46	47.5	gi|672163629|ref|XP_008801671.1| PREDICTED: F-box only protein 6-like isoform X1 [Phoenix dactylifera]
c131040_g2	93.06	109.13	111.33	52.87	71.42	77.52	85.61	95.03	104.07	gi|672109142|ref|XP_008788681.1| PREDICTED: probable NADH dehydrogenase [ubiquinone] 1 alpha subcomplex subunit 12 [Phoenix dactylifera]
c129793_g1	93.05	63.19	62.87	24.26	19.41	19.97	35.23	25.56	29.06	gi|743828891|ref|XP_010933996.1| PREDICTED: homeobox protein knotted-1-like 1 isoform X2 [Elaeis guineensis]
c138200_g7	92.93	59.44	59.66	56.97	36.04	31.27	77.94	57.75	54.63	gi|720076138|ref|XP_010279535.1| PREDICTED: RNA-binding protein 8A-like [Nelumbo nucifera]
c183316_g1	92.85	74.45	80.16	50.63	50.57	72.82	95.55	106.81	106.16	gi|743839408|ref|XP_011025935.1| PREDICTED: peptidyl-prolyl cis-trans isomerase Pin1 [Populus euphratica] gi|743938484|ref|XP_011013669.1| PREDICTED: peptidyl-prolyl cis-trans isomerase Pin1 [Populus euphratica]
c150749_g4	92.78	50.49	49.21	38.09	28.79	27.72	54.74	21.89	21.38	-
c132126_g2	92.76	42.21	46.76	41.8	27.64	20.37	71.75	43.19	42.96	gi|719968027|ref|XP_010263565.1| PREDICTED: uncharacterized protein LOC104601793 [Nelumbo nucifera]
c138537_g1	92.76	38.49	42.89	551.94	227.2	228.99	684.31	268.94	262.37	gi|743849920|ref|XP_010939745.1| PREDICTED: mitochondrial uncoupling protein 5-like [Elaeis guineensis]
c107901_g1	92.74	117.98	183.79	31.26	131.01	90.35	32.7	92.77	101.05	gi|1035958495|gb|OAY79735.1| Cell division cycle protein [Ananas comosus]
c7086_g1	92.67	84.15	80.33	75.02	62.71	58.61	106.77	80.71	98.2	gi|672170578|ref|XP_008805349.1| PREDICTED: UBP1-associated protein 2A-like [Phoenix dactylifera]
c146143_g1	92.61	80.61	84.11	60.42	51.12	52.42	67	58	61.51	gi|743849160|ref|XP_010939550.1| PREDICTED: uncharacterized protein LOC105058355 [Elaeis guineensis] gi|743849164|ref|XP_010939551.1| PREDICTED: uncharacterized protein LOC105058355 [Elaeis guineensis] gi|743849168|ref|XP_010939552.1| PREDICTED: uncharacterized protein LOC105058355 [Elaeis guineensis] gi|743849171|ref|XP_010939553.1| PREDICTED: uncharacterized protein LOC105058355 [Elaeis guineen…
c59426_g1	92.59	84.07	86.57	332.32	320.01	321.75	326.88	330.17	318.31	gi|719994898|ref|XP_010254319.1| PREDICTED: uncharacterized protein LOC104595325 [Nelumbo nucifera] gi|719994901|ref|XP_010254320.1| PREDICTED: uncharacterized protein LOC104595325 [Nelumbo nucifera]
c130202_g2	92.57	84.05	87.38	61.35	49.04	46.83	76.82	72.29	68.25	gi|695052254|ref|XP_009414180.1| PREDICTED: acyl carrier protein 2, mitochondrial-like [Musa acuminata subsp. malaccensis]
c86622_g1	92.57	392.08	363.01	33.47	195.69	195.21	23.44	155.32	162.01	gi|507118467|gb|AGM34860.1| glutathione peroxidase, partial [Eleutherococcus senticosus]
c132917_g2	92.56	34.66	38.59	36.25	17.77	17.42	49.91	30.74	28.93	gi|1035940105|gb|OAY66747.1| Reticulon-like protein B22 [Ananas comosus]
c143026_g2	92.55	80.55	90.82	67.04	62.04	69.06	77.38	61.38	73.61	-
c146036_g1	92.53	67.21	61.03	45.29	32.47	33.67	117.06	66.18	63.8	gi|695031819|ref|XP_009403436.1| PREDICTED: far upstream element-binding protein 2-like [Musa acuminata subsp. malaccensis]
c133874_g1	92.5	83.98	85.49	91.61	79.3	82.33	108.28	102.87	99.71	gi|743806008|ref|XP_010927573.1| PREDICTED: succinate dehydrogenase [ubiquinone] iron-sulfur subunit 2, mitochondrial-like [Elaeis guineensis] gi|743806012|ref|XP_010927574.1| PREDICTED: succinate dehydrogenase [ubiquinone] iron-sulfur subunit 2, mitochondrial-like [Elaeis guineensis] gi|743806016|ref|XP_010927575.1| PREDICTED: succinate dehydrogenase [ubiquinone] iron-sulfur subunit 2, mitochond…
c140364_g1	92.5	34.15	36.71	158.53	72	72.27	52.42	28.58	26.3	gi|719976727|ref|XP_010248629.1| PREDICTED: uncharacterized protein LOC104591485 [Nelumbo nucifera]
c74055_g1	92.48	77.48	84.93	49.22	46.01	44.22	122.58	97.32	114.58	-
c146337_g1	92.39	57.1	51.07	87.22	40.37	35.57	181.99	92.97	87.29	gi|743791037|ref|XP_010923317.1| PREDICTED: transcription factor bHLH79 isoform X2 [Elaeis guineensis]
c147928_g1	92.33	47.85	46.49	81.88	43.54	46.99	122.68	59.13	59.8	gi|573592470|gb|AHG06396.1| phenylalanine ammonia lyase 2 [Ornithogalum longebracteatum]
c142703_g3	92.33	184.8	179.42	7.19	21.77	23.53	34.02	65.81	66.75	gi|659075148|ref|XP_008437990.1| PREDICTED: uncharacterized protein LOC103483245 [Cucumis melo]
c134072_g2	92.27	30.77	38.02	96.37	37.52	35.11	96.22	15.28	23.91	gi|1021049872|gb|KZN07652.1| hypothetical protein DCAR_008489 [Daucus carota subsp. sativus]
c134173_g3	92.27	47.46	49.65	42.74	25.04	26.8	68.21	42.03	46.86	gi|695025008|ref|XP_009399738.1| PREDICTED: THO complex subunit 4D-like [Musa acuminata subsp. malaccensis]
c140000_g3	92.23	83.71	81.51	42.06	29.75	27.05	91.67	84.18	83.1	gi|695025076|ref|XP_009399777.1| PREDICTED: heat shock 70 kDa protein 14-like [Musa acuminata subsp. malaccensis]
c129975_g1	92.21	89.5	89	42	28	26.61	77.96	61.86	71.71	gi|168031292|ref|XP_001768155.1| predicted protein [Physcomitrella patens] gi|162680593|gb|EDQ67028.1| predicted protein [Physcomitrella patens]
c143220_g1	92.1	91.95	91.44	90.38	84.66	86.97	112.98	85.85	92.61	gi|672143036|ref|XP_008795385.1| PREDICTED: lysophospholipid acyltransferase 1-like [Phoenix dactylifera]
c134274_g1	92.08	57.73	60.12	2.51	0.44	0.4	6.04	2.47	4.19	gi|357144188|ref|XP_003573204.1| PREDICTED: AT-hook motif nuclear-localized protein 26-like [Brachypodium distachyon] gi|944059045|gb|KQJ94635.1| hypothetical protein BRADI_3g11600 [Brachypodium distachyon]
c135948_g1	92.07	121.56	114.28	42.53	115.43	95.59	40.04	53.07	52.27	-
c128358_g2	92.03	26.82	51.4	0	0	0	0	0	0	-
c150730_g1	91.9	47.54	28.86	401.03	107.83	116.05	84.55	54.38	48.99	gi|763747531|gb|KJB14970.1| hypothetical protein B456_002G152100, partial [Gossypium raimondii]
c136419_g2	91.84	25.61	24.55	157.49	47.36	44.78	98.75	28.9	31.5	gi|672124196|ref|XP_008785472.1| PREDICTED: copper transporter 6-like [Phoenix dactylifera]
c134411_g1	91.74	79.74	73.51	51.12	46.12	49.85	91.35	75.35	65.62	gi|514724587|ref|XP_004955528.1| PREDICTED: probable carboxylesterase 15 [Setaria italica] gi|944258277|gb|KQL22534.1| hypothetical protein SETIT_030423mg [Setaria italica]
c143730_g1	91.73	25.75	24.3	161.55	54.8	58.84	103.64	32.52	39.44	-
c126150_g2	91.67	67.4	71.18	77.78	60.38	69.25	70.31	64.46	56.65	gi|672112899|ref|XP_008808181.1| PREDICTED: V-type proton ATPase subunit C-like [Phoenix dactylifera]
c95176_g1	91.63	66.09	66.63	61.87	28.45	26.87	83.69	58.69	50.98	gi|743829772|ref|XP_010934236.1| PREDICTED: mitochondrial import receptor subunit TOM9-2-like [Elaeis guineensis]
c118124_g1	91.59	83.59	79.7	54.85	39.85	46.88	47.7	59.7	50.58	gi|743820866|ref|XP_010931892.1| PREDICTED: uncharacterized protein LOC105052684 [Elaeis guineensis]
c140483_g1	91.57	61.14	63.33	24.65	15.46	17.73	61.76	45.03	48	gi|743791688|ref|XP_010923500.1| PREDICTED: uncharacterized protein LOC105046575 [Elaeis guineensis]
c146626_g1	91.57	0	0	140.56	0	0	144.29	0	0	-
c148453_g1	91.56	84.75	93.58	47.91	54.32	57.69	62.05	63.21	59.71	gi|743784776|ref|XP_010921744.1| PREDICTED: putative chromatin-remodeling complex ATPase chain [Elaeis guineensis]
c146337_g4	91.55	76.55	80.69	56.62	55.92	51.62	68.05	73.36	60.05	-
c145125_g3	91.55	41.32	42.13	28.54	15.04	15.85	44.72	25.11	20.16	gi|743810261|ref|XP_010928848.1| PREDICTED: uncharacterized protein LOC105050497 [Elaeis guineensis]
c126646_g1	91.54	76.54	76.69	100.23	107.14	95.23	126.04	115.54	118.04	-
c145941_g1	91.49	51.41	50.25	53.89	34.98	30.75	74.93	42.38	43.25	gi|695060772|ref|XP_009418790.1| PREDICTED: uncharacterized protein LOC103998907 [Musa acuminata subsp. malaccensis]
c146975_g4	91.48	37.04	43.08	49.96	26.11	22.82	66.74	29.12	31.5	gi|359489721|ref|XP_002277034.2| PREDICTED: zinc finger CCCH domain-containing protein 1 [Vitis vinifera] gi|297745423|emb|CBI40503.3| unnamed protein product [Vitis vinifera]
c86514_g1	91.34	76.34	73.41	22.98	17.57	17.98	62.86	57.54	54.86	gi|909836607|gb|AKU19319.1| putative progesterone 5beta-reductase [Ornithogalum longebracteatum]
c268633_g1	91.31	6.99	4.27	38.89	0	8.5	16.48	2.13	0	-
c145368_g2	91.27	108.46	112.04	22.62	29.49	27.57	39.14	41.56	43.48	gi|672135700|ref|XP_008791523.1| PREDICTED: probable E3 ubiquitin-protein ligase LOG2 [Phoenix dactylifera]
c141638_g3	91.16	61.6	64.75	17.56	21.51	17.71	47.66	43.49	39.52	gi|743841929|ref|XP_010937663.1| PREDICTED: uncharacterized protein LOC105056963 isoform X3 [Elaeis guineensis]
c95637_g1	91.15	61.18	67.03	41.23	31.02	26.59	66.89	37.04	47.02	gi|695021592|ref|XP_009397889.1| PREDICTED: cell division cycle protein 48 homolog [Musa acuminata subsp. malaccensis]
c132627_g1	91.13	22.37	20.92	77.96	23.46	22.71	62.86	20.54	14.74	gi|703137802|ref|XP_010106562.1| Transcription elongation factor B polypeptide 1 [Morus notabilis] gi|587923388|gb|EXC10738.1| Transcription elongation factor B polypeptide 1 [Morus notabilis]
c145538_g2	91.03	240.85	247.72	30.65	99.91	97.79	152.05	425.76	422.76	gi|586713363|ref|XP_006847231.1| PREDICTED: 40S ribosomal protein S7 [Amborella trichopoda] gi|548850260|gb|ERN08812.1| hypothetical protein AMTR_s00017p00257730 [Amborella trichopoda]
c147820_g2	90.97	46.94	46.07	49.84	24.63	26.67	92.99	48.12	46.03	gi|743800612|ref|XP_010926029.1| PREDICTED: uncharacterized protein LOC105048428 [Elaeis guineensis]
c131201_g2	90.96	82.96	83.27	47.71	32.71	30.16	112.8	124.8	123.16	gi|672190803|ref|XP_008775343.1| PREDICTED: probable histone H2A variant 3 [Phoenix dactylifera]
c135535_g1	90.94	82.42	84.87	62.92	50.61	41.2	49.92	41.2	41.35	gi|695036716|ref|XP_009405827.1| PREDICTED: tetraspanin-3-like [Musa acuminata subsp. malaccensis]
c143320_g1	90.91	52.52	56.34	31.29	22	18.8	53.95	43.46	37.72	-
c138879_g3	90.9	78.9	80.1	119.57	108.89	111.57	131.13	122.13	112.41	gi|743778472|ref|XP_010919697.1| PREDICTED: LOW QUALITY PROTEIN: 3-isopropylmalate dehydratase small subunit 3-like [Elaeis guineensis]
c134504_g5	90.9	41.14	42.62	31.81	18.42	17.53	79.81	40.8	40.16	-
c145933_g3	90.89	78.89	76.13	32.64	23.79	24.64	61.87	52.87	54.6	gi|703157000|ref|XP_010111613.1| hypothetical protein L484_017639 [Morus notabilis] gi|587944921|gb|EXC31358.1| hypothetical protein L484_017639 [Morus notabilis]
c132480_g2	90.89	85.21	85.67	68.92	64.62	61.51	85.99	83.32	81.85	gi|720073080|ref|XP_010278589.1| PREDICTED: E3 ubiquitin-protein ligase At1g12760 isoform X2 [Nelumbo nucifera]
c148117_g1	90.86	72.46	84.23	66.6	77.35	82.9	66.19	48.81	42.65	gi|157043074|gb|ABV02070.1| transcription factor 1R-MYB1 [Chimonanthus praecox]
c125231_g1	90.81	75.81	72.75	11.61	6.93	6.61	24.15	18.9	16.15	gi|695057378|ref|XP_009416958.1| PREDICTED: amino acid permease 6-like [Musa acuminata subsp. malaccensis]
c144851_g2	90.78	219.31	220.36	9.48	31.32	31.12	37.64	91.58	90.81	gi|901820590|gb|KMZ72487.1| hypothetical protein ZOSMA_162G00060 [Zostera marina]
c140376_g1	90.75	78.46	72.34	74.22	72.49	82.67	74.65	63.18	66.72	gi|672141756|ref|XP_008794716.1| PREDICTED: myb family transcription factor APL-like isoform X1 [Phoenix dactylifera] gi|672141758|ref|XP_008794717.1| PREDICTED: myb family transcription factor APL-like isoform X1 [Phoenix dactylifera]
c147361_g2	90.75	117.99	124.94	72.64	103.53	109.94	147.83	183.91	171.02	gi|743804534|ref|XP_010927215.1| PREDICTED: uncharacterized protein LOC105049306 [Elaeis guineensis]
c98638_g1	90.66	60.37	46.45	71.28	38.29	32.35	95.14	28.91	50.36	gi|672129851|ref|XP_008788443.1| PREDICTED: E3 ubiquitin-protein ligase UPL3-like [Phoenix dactylifera]
c102354_g2	90.64	39.07	37.48	3.41	1.48	0.71	66.84	33.77	34.11	gi|1035892979|gb|OAY22583.1| hypothetical protein MANES_18G010000 [Manihot esculenta]
c149416_g1	90.59	107.73	116.3	77.53	141.25	133.09	86.38	133.15	116.93	gi|703142825|ref|XP_010107851.1| hypothetical protein L484_027438 [Morus notabilis] gi|587930122|gb|EXC17251.1| hypothetical protein L484_027438 [Morus notabilis]
c144198_g2	90.54	58.75	64.76	72.27	59.1	45.04	73.8	43.32	45.48	gi|720085655|ref|XP_010243586.1| PREDICTED: probable serine/threonine-protein kinase At1g54610 [Nelumbo nucifera]
c3601_g1	90.54	51.62	69.18	37.27	47.82	42.41	150.87	78.3	96.29	gi|719964173|ref|XP_010251927.1| PREDICTED: protein GPR107-like [Nelumbo nucifera]
c148912_g2	90.52	164.75	173.08	47.02	103.23	111.44	67.45	148.91	147.28	gi|695031923|ref|XP_009403490.1| PREDICTED: serine/threonine protein phosphatase 2A 55 kDa regulatory subunit B beta isoform-like isoform X1 [Musa acuminata subsp. malaccensis]
c138550_g3	90.51	38.65	39.39	85.28	46.01	48.12	220.92	105.55	114.14	gi|695005335|ref|XP_009389115.1| PREDICTED: trihelix transcription factor GTL1-like isoform X1 [Musa acuminata subsp. malaccensis]
c147191_g1	90.51	169.7	170.46	62.2	144.14	153.81	71.67	153.1	151.09	gi|731911223|gb|AIZ68188.1| putative protein phosphatase [Ornithogalum longebracteatum]
c133683_g1	90.5	45.3	47.95	57.91	30.14	32.86	96.04	51.21	52.01	gi|695044492|ref|XP_009409999.1| PREDICTED: probable galacturonosyltransferase 9 [Musa acuminata subsp. malaccensis]
c123468_g1	90.43	78.43	80.37	2.21	0.59	1.32	1.89	1.27	1.86	gi|1035919464|gb|OAY49054.1| hypothetical protein MANES_05G025800 [Manihot esculenta]
c145450_g2	90.41	49.3	50.21	116.64	62.42	58.33	173.68	83.09	81.39	-
c17282_g1	90.38	64.11	39.72	30.16	9.05	12.85	77.33	26.27	61.79	-
c140890_g8	90.35	78.35	80.3	63.62	58.62	65.43	127.81	111.81	116.07	gi|595849622|ref|XP_007209764.1| hypothetical protein PRUPE_ppa013350mg [Prunus persica] gi|462405499|gb|EMJ10963.1| hypothetical protein PRUPE_ppa013350mg [Prunus persica]
c149078_g1	90.27	105.52	94.84	32.27	44.99	47	84.73	80.69	80.21	gi|743794956|ref|XP_010924319.1| PREDICTED: F-box/LRR-repeat protein At3g26922-like [Elaeis guineensis]
c118616_g2	90.24	25.33	25.78	58.72	19.23	15.25	57.43	19.45	22.39	-
c140791_g4	90.21	80.98	82.95	268.14	307.96	340.08	326.62	287.07	272.74	gi|255644675|gb|ACU22840.1| unknown [Glycine max]
c137231_g1	90.16	78.2	83.26	42.16	48.15	48.34	91.9	93.77	95.49	gi|672164414|ref|XP_008802082.1| PREDICTED: pinin-like [Phoenix dactylifera] gi|672164416|ref|XP_008802083.1| PREDICTED: pinin-like [Phoenix dactylifera] gi|672164418|ref|XP_008802084.1| PREDICTED: pinin-like [Phoenix dactylifera] gi|672164420|ref|XP_008802087.1| PREDICTED: pinin-like [Phoenix dactylifera]
c144183_g3	90.1	28.78	32.29	61.23	30.95	36.14	62.01	22.9	19.43	gi|672122537|ref|XP_008784602.1| PREDICTED: oxysterol-binding protein-related protein 3C [Phoenix dactylifera]
c144538_g1	90.08	75.08	78.54	52.23	50.94	47.23	88.68	87.72	80.68	gi|672204291|ref|XP_008778873.1| PREDICTED: U3 small nucleolar RNA-associated protein 25-like [Phoenix dactylifera]
c136529_g6	90.07	48.42	52.07	36.86	24.51	25.27	81.45	50.45	54.55	gi|590653921|ref|XP_007033557.1| Uncharacterized protein TCM_019726 [Theobroma cacao] gi|508712586|gb|EOY04483.1| Uncharacterized protein TCM_019726 [Theobroma cacao]
c114898_g1	90.04	85.89	87.85	6.33	8.14	6.22	4.89	5.31	4.34	gi|672127033|ref|XP_008786975.1| PREDICTED: putative glycerol-3-phosphate transporter 1 [Phoenix dactylifera]
c127037_g1	90	165.45	151.43	13.89	43.58	44.51	59.78	104.2	97.8	gi|743809246|ref|XP_010928555.1| PREDICTED: uncharacterized protein LOC105050293 [Elaeis guineensis]
c143702_g3	89.99	302.5	304.49	46.81	208.2	207.4	53.65	221.41	211.61	gi|695021293|ref|XP_009397730.1| PREDICTED: serine/threonine-protein kinase SAPK10 [Musa acuminata subsp. malaccensis]
c121297_g2	89.94	65.61	58.63	47.65	30.46	20.7	113.75	71.55	82.77	gi|19172403|gb|AAL85887.1|AF479058_1 70 kDa heat shock protein [Sandersonia aurantiaca]
c132402_g4	89.92	77.92	85.07	115.29	92.53	107.29	178.4	169.4	152.71	gi|823126462|ref|XP_012488982.1| PREDICTED: 60S ribosomal protein L29-1-like [Gossypium raimondii] gi|763743147|gb|KJB10646.1| hypothetical protein B456_001G213200 [Gossypium raimondii]
c127186_g5	89.92	48.58	51.32	25.09	15.89	14.75	92.6	54.18	55.81	gi|743858890|ref|XP_010942476.1| PREDICTED: probable prefoldin subunit 5 [Elaeis guineensis]
c143075_g2	89.89	77.89	86.34	33.88	23.63	25.88	48.25	39.25	42.64	-
c136165_g2	89.89	34.52	35.28	70.09	26.2	27.59	170.35	82.7	83.17	gi|720011236|ref|XP_010259500.1| PREDICTED: dynein light chain 2, cytoplasmic-like [Nelumbo nucifera]
c146116_g2	89.84	77.84	79.14	69.84	73.08	61.84	105.33	96.33	88.99	gi|1026068465|ref|XP_016578640.1| PREDICTED: V-type proton ATPase subunit c&apos;&apos;1 isoform X1 [Capsicum annuum] gi|1026068467|ref|XP_016578641.1| PREDICTED: V-type proton ATPase subunit c&apos;&apos;1 isoform X2 [Capsicum annuum]
c143755_g2	89.83	125.76	124.79	49.21	93.17	83.12	60.08	74.26	77.29	gi|695060551|ref|XP_009418669.1| PREDICTED: UTP--glucose-1-phosphate uridylyltransferase [Musa acuminata subsp. malaccensis]
c144909_g6	89.82	68.47	65.81	52.75	52.89	53.52	75.78	51.91	53.32	gi|976912480|gb|KVH98961.1| Protein kinase, catalytic domain-containing protein [Cynara cardunculus var. scolymus]
c146061_g8	89.81	130.45	123.04	27.48	51.19	56.32	55.36	108.55	119.75	gi|970059284|ref|XP_015056371.1| PREDICTED: proteasome subunit alpha type-3-like [Solanum pennellii]
c141348_g1	89.76	47.05	39.73	54.8	27.89	29.71	62.02	30.18	22.36	gi|923643556|ref|XP_013642076.1| PREDICTED: COBW domain-containing protein 1-like [Brassica napus] gi|674916970|emb|CDY16163.1| BnaA09g28970D [Brassica napus]
c144331_g3	89.72	49.64	52.6	38.42	25.9	25.13	73.56	34.2	37.45	gi|672134890|ref|XP_008791099.1| PREDICTED: serine/threonine-protein kinase PBS1-like [Phoenix dactylifera]
c146908_g1	89.68	81.78	87.74	58.19	76.92	65.36	81.95	69.86	78.18	gi|657958817|ref|XP_008370946.1| PREDICTED: DEAD-box ATP-dependent RNA helicase 37-like [Malus domestica]
c129034_g1	89.68	66.05	59.49	32.99	24.66	26.71	94.45	68.35	72.11	gi|743807546|ref|XP_010928120.1| PREDICTED: phosphatidylinositol 4-kinase gamma 7-like [Elaeis guineensis] gi|743807550|ref|XP_010928121.1| PREDICTED: phosphatidylinositol 4-kinase gamma 7-like [Elaeis guineensis] gi|743807554|ref|XP_010928122.1| PREDICTED: phosphatidylinositol 4-kinase gamma 7-like [Elaeis guineensis]
c175103_g1	89.67	4.51	20.49	18.26	16.3	18.1	40.42	4.09	9.51	-
c134676_g2	89.67	47.82	48.8	45.96	26.82	29.85	115.24	51.2	50.04	gi|743778500|ref|XP_010919713.1| PREDICTED: ethylene-responsive transcription factor 2 [Elaeis guineensis]
c117156_g1	89.65	42.48	46.08	20.15	12.21	9.54	51.38	34.79	36.16	gi|802724377|ref|XP_012085707.1| PREDICTED: uncharacterized protein LOC105644832 [Jatropha curcas]
c110886_g2	89.61	67.11	69.13	34.35	30.46	29.72	99.95	71.08	66.49	-
c89144_g1	89.57	69.57	66.16	18.97	8.97	23.25	71.63	36.6	56.63	gi|695052509|ref|XP_009414313.1| PREDICTED: uncharacterized protein LOC103995444 [Musa acuminata subsp. malaccensis]
c149750_g1	89.56	92.54	114.92	32.43	84.6	102.07	36.4	159.22	150.84	gi|672129757|ref|XP_008788394.1| PREDICTED: trans-resveratrol di-O-methyltransferase-like [Phoenix dactylifera]
c149239_g4	89.54	37.75	34.85	10.16	2.5	2.97	78.55	30.51	29.5	gi|672121037|ref|XP_008783809.1| PREDICTED: uncharacterized protein LOC103702940 [Phoenix dactylifera]
c143669_g1	89.51	54.83	57.39	33.98	21.99	19.69	53.73	32.66	30.47	gi|544590485|gb|AGW24660.1| 4-coumarate:coenzyme A ligase [Ornithogalum longebracteatum]
c133921_g3	89.46	99.89	86.25	51.1	37.1	38.2	70.5	45.12	64.25	gi|672184844|ref|XP_008812669.1| PREDICTED: DNA-directed RNA polymerases II, IV and V subunit 12 [Phoenix dactylifera]
c137093_g8	89.39	59.52	57.15	828.02	685.83	666.31	104.75	81.66	63.34	gi|944262757|gb|KQL27014.1| hypothetical protein SETIT_030696mg [Setaria italica]
c141776_g3	89.37	77.37	69.23	53.19	37.2	45.19	73.26	64.26	66.93	-
c149102_g1	89.37	219.88	222.45	31.78	130.33	146.64	79.05	272.25	242.74	gi|728821495|gb|KHG04362.1| DEAD-box ATP-dependent RNA helicase 56 [Gossypium arboreum]
c148663_g1	89.34	47.34	55.4	101.86	93.03	78.59	78.53	49.65	37.92	gi|672117860|ref|XP_008782121.1| PREDICTED: probable protein phosphatase 2C 62 [Phoenix dactylifera]
c144109_g8	89.33	81.33	65.06	58.5	43.5	45.09	18.3	30.3	56.85	-
c148478_g4	89.33	77.78	84.83	39.47	43.56	35.85	57.19	64.62	55.86	gi|700254877|gb|AIU49059.1| LOS4, partial [Yucca filamentosa]
c148254_g1	89.29	92.58	86.08	87.46	73.46	59.46	65.65	73.42	59.4	gi|672117975|ref|XP_008782184.1| PREDICTED: pyridoxine/pyridoxamine 5&apos;-phosphate oxidase 1, chloroplastic [Phoenix dactylifera]
c117608_g1	89.27	34.22	34.21	616.02	257.04	249.51	332.29	141.88	136.85	gi|672152818|ref|XP_008797524.1| PREDICTED: 50S ribosomal protein L31, chloroplastic [Phoenix dactylifera] gi|672152820|ref|XP_008797525.1| PREDICTED: 50S ribosomal protein L31, chloroplastic [Phoenix dactylifera]
c139120_g1	89.23	0	0	123.3	0	0	138.12	0	0	gi|474288277|gb|EMS61232.1| hypothetical protein TRIUR3_16882 [Triticum urartu]
c122169_g1	89.22	45.23	44.49	78.67	45.79	47.03	85.92	46.49	50.65	gi|743802312|ref|XP_010926580.1| PREDICTED: uncharacterized protein LOC105048821 [Elaeis guineensis]
c137010_g1	89.22	34.43	34.17	36.42	16.11	18.83	24.06	13.59	14.07	gi|743782111|ref|XP_010921063.1| PREDICTED: uncharacterized protein LOC105044761 [Elaeis guineensis]
c130246_g1	89.18	77.18	79.39	196.12	183.05	188.12	108.22	99.22	91.86	gi|695021750|ref|XP_009397973.1| PREDICTED: heavy metal-associated isoprenylated plant protein 26-like [Musa acuminata subsp. malaccensis]
c43170_g1	89.16	14.78	8.93	54.88	0	0	108.82	17.82	13.75	gi|1002225040|ref|XP_015614087.1| PREDICTED: probable protein phosphatase 2C 8 [Oryza sativa Japonica Group] gi|75286811|sp|Q5SN75.1|P2C08_ORYSJ RecName: Full=Probable protein phosphatase 2C 8; Short=OsPP2C08 gi|55773943|dbj|BAD72331.1| protein phosphatase 2C-like [Oryza sativa Japonica Group] gi|113533285|dbj|BAF05668.1| Os01g0656200 [Oryza sativa Japonica Group] gi|215686965|dbj|BAG90835.1| unn…
c86726_g1	89.11	44.12	42.97	0.71	0	0	2.88	0.98	1.73	-
c131276_g2	89	41.74	44.79	93.8	49.73	44.67	52.61	22.32	21.89	gi|224091022|ref|XP_002309149.1| AMP deaminase family protein [Populus trichocarpa] gi|222855125|gb|EEE92672.1| AMP deaminase family protein [Populus trichocarpa]
c142756_g5	88.98	56.61	58.01	20.49	16.74	16.53	48.8	33.37	32.21	gi|1035961042|gb|OAY81847.1| 5&apos;-nucleotidase SurE [Ananas comosus]
c106411_g1	88.94	80.94	83.78	64.29	49.29	60.81	86.57	98.57	104.75	gi|698452158|ref|XP_009779334.1| PREDICTED: cytochrome b-c1 complex subunit 9-like [Nicotiana sylvestris] gi|1025219883|ref|XP_016481852.1| PREDICTED: cytochrome b-c1 complex subunit 9-like [Nicotiana tabacum]
c148645_g3	88.91	24.61	27.65	51.64	10.22	24.23	88.09	23.82	28.55	gi|1035953870|gb|OAY76021.1| Serine/threonine-protein phosphatase [Ananas comosus]
c131766_g3	88.91	46.86	45.34	23.12	14.81	15.45	57.32	37.02	38.2	gi|672141134|ref|XP_008794386.1| PREDICTED: ubiquitin receptor RAD23b-like [Phoenix dactylifera] gi|672141136|ref|XP_008794387.1| PREDICTED: ubiquitin receptor RAD23b-like [Phoenix dactylifera]
c146503_g1	88.91	97.34	106.63	55.81	70.48	76.63	75.53	84	76.92	gi|743838151|ref|XP_010936617.1| PREDICTED: heterogeneous nuclear ribonucleoprotein 1-like [Elaeis guineensis]
c145412_g1	88.9	67.22	70.24	98.94	81.98	78.03	120.96	109.14	107.23	gi|695014006|ref|XP_009393807.1| PREDICTED: V-type proton ATPase 16 kDa proteolipid subunit-like [Musa acuminata subsp. malaccensis]
c147996_g4	88.89	36.19	38.68	87.69	49.21	44.42	34.09	14.92	20.03	gi|695050196|ref|XP_009413072.1| PREDICTED: RING-H2 finger protein ATL80-like [Musa acuminata subsp. malaccensis]
c106893_g1	88.87	46.69	50.13	21.68	16.41	15.91	58.24	39.19	31.68	gi|743777137|ref|XP_010918987.1| PREDICTED: transcription initiation factor IIF subunit beta-like [Elaeis guineensis]
c133674_g1	88.85	31.27	33.45	72.82	34.02	34.65	132.79	36.1	33.69	gi|590674803|ref|XP_007039269.1| Duplicated homeodomain-like superfamily protein, putative isoform 2 [Theobroma cacao] gi|508776514|gb|EOY23770.1| Duplicated homeodomain-like superfamily protein, putative isoform 2 [Theobroma cacao]
c135602_g5	88.7	115.28	123.02	31.88	58	53.66	74.88	109.3	111.33	gi|720024409|ref|XP_010263624.1| PREDICTED: protein RER1B [Nelumbo nucifera]
c149369_g3	88.65	27.7	27.99	77.8	20.03	17.78	84.86	23.9	23.78	gi|743884510|ref|XP_010909706.1| PREDICTED: uncharacterized protein LOC105035733 [Elaeis guineensis]
c141514_g1	88.56	93.03	95.16	40.84	68.57	61.5	50.61	60.87	57.36	gi|743770498|ref|XP_010915532.1| PREDICTED: mitogen-activated protein kinase 1 [Elaeis guineensis]
c146472_g1	88.49	59.94	64.84	43.17	44.77	39.15	69.93	47.5	49.65	gi|1035952107|gb|OAY74659.1| hypothetical protein ACMD2_02370 [Ananas comosus]
c87063_g1	88.41	30.64	28.07	155.87	114.71	88.13	187.18	67.56	44.87	-
c118298_g1	88.38	70.61	73.35	27.8	31.86	25.43	70.44	75.69	81.57	gi|567884089|ref|XP_006434603.1| hypothetical protein CICLE_v10003057mg [Citrus clementina] gi|567884091|ref|XP_006434604.1| hypothetical protein CICLE_v10003057mg [Citrus clementina] gi|557536725|gb|ESR47843.1| hypothetical protein CICLE_v10003057mg [Citrus clementina] gi|557536726|gb|ESR47844.1| hypothetical protein CICLE_v10003057mg [Citrus clementina]
c136859_g3	88.23	105.95	111.19	35.65	51.94	54.33	35.73	55.26	53.13	-
c144163_g1	88.18	83.3	89.55	27.95	29.98	27.96	68.8	65.9	66.16	gi|743798493|ref|XP_010925253.1| PREDICTED: protein arginine N-methyltransferase PRMT10 [Elaeis guineensis]
c145398_g1	88.17	76.17	78.61	22.76	18.12	14.76	41.72	32.72	34.9	gi|695077556|ref|XP_009386124.1| PREDICTED: uncharacterized protein LOC103973319 [Musa acuminata subsp. malaccensis]
c136221_g2	88.17	82.32	86.26	54.85	55.1	54.5	75.43	70.1	63.28	gi|937897339|dbj|BAS73319.1| Os01g0633900, partial [Oryza sativa Japonica Group]
c147820_g4	88.12	36.74	36.75	38.51	13.37	13.85	92.84	34.59	31.68	gi|1035938515|gb|OAY65846.1| Transmembrane protein 214-B [Ananas comosus]
c145868_g1	88.07	42.52	41.6	29.3	15.14	15.28	30.63	14.35	15.86	gi|695056170|ref|XP_009416298.1| PREDICTED: zinc transporter 6, chloroplastic [Musa acuminata subsp. malaccensis]
c134464_g1	88.01	56.16	61.76	42.84	30.63	30.83	80.1	60.77	57.74	gi|371721838|gb|AEX55242.1| unknown [Allium sativum]
c146980_g1	88	74.97	76.22	45.47	44.26	42.2	69.39	60.12	62.42	gi|743771133|ref|XP_010915854.1| PREDICTED: probable plastidic glucose transporter 2 [Elaeis guineensis] gi|743771135|ref|XP_010915855.1| PREDICTED: probable plastidic glucose transporter 2 [Elaeis guineensis] gi|743771137|ref|XP_010915856.1| PREDICTED: probable plastidic glucose transporter 2 [Elaeis guineensis]
c120291_g1	87.99	118.73	124.88	2.04	4.73	4.56	20.02	27.59	30.35	gi|695039839|ref|XP_009407472.1| PREDICTED: uncharacterized protein LOC103990145 [Musa acuminata subsp. malaccensis]
c143064_g3	87.98	56.46	61.79	5.1	4.31	4.69	14.1	10.56	9.16	gi|672123252|ref|XP_008784982.1| PREDICTED: galactinol--sucrose galactosyltransferase [Phoenix dactylifera]
c145024_g3	87.95	56.29	55.08	13.56	8.05	9.59	61.01	35.39	42.88	gi|225446672|ref|XP_002281964.1| PREDICTED: uncharacterized protein LOC100265970 [Vitis vinifera]
c146100_g5	87.86	23.05	23.75	45.36	7.27	9.36	205.35	63.15	71.41	gi|747108398|ref|XP_011069522.1| PREDICTED: histone H4-like, partial [Sesamum indicum]
c138543_g4	87.84	75.84	59.43	122.47	117.47	118.16	412.51	396.51	449.64	gi|255674142|dbj|BAF10593.2| Os03g0105600 [Oryza sativa Japonica Group]
c141936_g3	87.76	50.99	58.81	80.26	54.35	56.22	79.05	45.16	47.32	gi|743762408|ref|XP_010908002.1| PREDICTED: uncharacterized protein LOC105034500 isoform X2 [Elaeis guineensis]
c139206_g4	87.74	74.26	74.95	33.73	34.62	32.48	88.62	82.5	80.75	gi|743761483|ref|XP_010942482.1| PREDICTED: uncharacterized protein LOC105060459 [Elaeis guineensis]
c150313_g1	87.71	23.11	34.01	41.68	14.07	15.01	70.88	27.99	20.97	-
c143075_g3	87.67	75.67	89.84	45.32	40.32	48.52	113.85	97.85	82.49	-
c146551_g5	87.66	30.08	33.59	43.55	16.61	18.37	89.51	39.12	36.71	gi|743763815|ref|XP_010912106.1| PREDICTED: probable prolyl 4-hydroxylase 4 [Elaeis guineensis]
c136675_g4	87.65	72.65	84.55	47.63	42.7	42.63	126.6	123.09	118.6	-
c132085_g5	87.61	45.09	40.54	41.44	35.83	44.76	89.28	65.18	50.65	-
c142257_g1	87.61	81.02	85.69	73.48	74	85.42	93.18	102.99	107.15	gi|296089694|emb|CBI39513.3| unnamed protein product [Vitis vinifera]
c135542_g1	87.6	75.6	83.97	81.96	67.51	73.96	112.53	103.53	111.39	gi|695068372|ref|XP_009381126.1| PREDICTED: putative cytochrome c oxidase subunit 5b-like [Musa acuminata subsp. malaccensis]
c141611_g1	87.59	72.59	85	34.69	33.08	29.69	78.14	71.39	70.14	gi|695020869|ref|XP_009397503.1| PREDICTED: uncharacterized protein LOC103982328 [Musa acuminata subsp. malaccensis]
c121217_g2	87.58	96.24	101.24	34.38	45.07	49.8	60.81	77.83	76.55	gi|720072905|ref|XP_010278532.1| PREDICTED: serine/arginine-rich splicing factor RS41 isoform X1 [Nelumbo nucifera]
c140133_g1	87.58	55.63	62.39	55.61	39.91	39.23	93.4	61.92	67.84	gi|743871894|ref|XP_010906404.1| PREDICTED: protein FLX-like 3 [Elaeis guineensis]
c135626_g4	87.57	71.91	58.76	12.53	8.57	5.93	57.83	46.22	46.68	gi|1025056493|ref|XP_016448439.1| PREDICTED: glutamate synthase [NADH], amyloplastic-like [Nicotiana tabacum]
c23435_g1	87.52	41.53	43.67	34.96	18.84	22.72	45.2	23.06	22.93	gi|672117420|ref|XP_008781895.1| PREDICTED: NADPH--cytochrome P450 reductase-like [Phoenix dactylifera]
c150643_g1	87.51	78.99	88.92	38.92	26.61	27.15	60.04	55.47	51.47	gi|672135237|ref|XP_008791285.1| PREDICTED: enolase isoform X2 [Phoenix dactylifera]
[truncated: 331,441+ more rows]
